# Supplementary material for: A Candidate-Gene Association Study for Berry Colour and Anthocyanin Content in Vitis vinifera L
Source: PLoS One. 2012 Sep 28;7(9):e46021. doi: 10.1371/journal.pone.0046021 (PMC3461038; doi:10.1371/journal.pone.0046021)
Supplement: Table S4 — P -values for all the association tests carried under Model B. (XLS) [file pone.0046021.s004.xls]

## Sheet: notes
all regression, for p59 have to compare with chi square too in a difrent table

## Sheet: directly from locate output
	p1	p2	p3	p4	p5	p6	p7	p8	p9	p10	p11	p12	p13	p14	p15	p16	p17	p18	p19	p20	p21	p22	p23	p24	p25	p26	p27	p28	p29	p30	p31	p32	p33	p34	p35	p36	p37	p38	p39	p40	p41	p42	p43	p44	p45	p46	p47	p48	p49
342_112113_S	0.176845	0.331327	0.0449057	0.477055	0.279058	0.935819	0.504983	0.526727	0.469812	0.707301	0.357872	0.734929	0.00678169	0.986513	0.248799	0.0975096	0.108105	0.23549	0.243684	0.297269	0.164536	0.713917	0.97782	0.119966	0.394911	0.129067	0.888273	0.915133	0.533934	0.0582863	0.0527	0.0767418	0.0104817	0.044261	0.565165	0.631374	0.866686	0.984874	0.682795	0.540576	0.270614	0.902348	0.975342	0.81025	0.235172	0.571229	0.805664	0.0476114	0.0162943
342_112719_S	0.113442	0.331331	0.0273706	0.408176	0.39656	0.729938	0.647513	0.749147	0.418957	0.737418	0.264881	0.855	0.0127098	0.953242	0.258694	0.136094	0.0894563	0.190908	0.158119	0.303649	0.108285	0.642979	0.824251	0.102498	0.386639	0.109069	0.971475	0.998852	0.649331	0.026211	0.0215463	0.0342386	0.00645397	0.0322076	0.258465	0.253137	0.463954	0.814747	0.520817	0.564062	0.349198	0.777532	0.803654	0.93806	0.125505	0.576784	0.794009	0.0253923	0.00762277
342_112815_S	0.178921	0.590349	0.252472	0.127507	0.18929	0.504553	0.669178	0.644454	0.172003	0.677813	0.0472335	0.374469	0.551015	0.224092	0.1903	0.0511075	0.331005	0.00118137	0.225865	0.583517	0.457465	0.229735	0.370508	0.00286886	0.158637	0.00347007	0.168907	0.727178	0.341188	0.183974	0.185172	0.123426	0.0402531	0.0222152	0.279684	0.54328	0.257403	0.182162	0.279414	0.453756	0.355111	0.414378	0.226546	0.530433	0.729632	0.213037	0.895831	0.049007	0.0290415
342_113232_S	0.508188	0.961313	0.417331	0.380406	0.468417	0.369587	0.445137	0.581451	0.464989	0.28997	0.502268	0.970841	0.0185359	0.489132	0.117871	0.4645	0.0828025	0.0440105	0.601486	0.922873	0.681818	0.613089	0.595631	0.0442112	0.718023	0.0265441	0.591776	0.273936	0.490799	0.0326513	0.0462148	0.0175623	0.00258952	0.00105788	0.166436	0.232727	0.22909	0.295073	0.742907	0.595532	0.217745	0.793315	0.899737	0.966834	0.939107	0.286244	0.940573	0.00431287	0.00122546
342_113440_S	0.545238	0.409563	0.718613	0.523633	0.267928	0.660758	0.630621	0.676386	0.90517	0.666114	0.377484	0.982463	0.839473	0.743062	0.887285	0.629671	0.497081	0.221137	0.566944	0.409938	0.81701	0.476158	0.928174	0.377258	0.478817	0.442911	0.800939	0.358445	0.279698	0.1749	0.441218	0.117455	0.0050222	0.00972911	0.777628	0.454059	0.799672	0.281472	0.205718	0.972242	0.448602	0.359521	0.935697	0.345703	0.205216	0.0512864	0.46171	0.0256736	0.0145972
342_114160_S	0.561889	0.612099	0.424052	0.723637	0.957909	0.0744326	0.21861	0.0998245	0.981072	0.369542	0.42573	0.156719	0.150086	0.255053	0.228195	0.706201	0.0218963	0.075388	0.586639	0.629601	0.538652	0.973063	0.451311	0.138602	0.307377	0.0400578	0.120442	0.247166	0.694186	0.847054	0.254366	0.777355	0.409183	0.40698	0.149846	0.174621	0.184393	0.885532	0.255578	0.503117	0.156964	0.31007	0.295259	0.122778	0.264377	0.0166677	0.0136572	0.498091	0.714791
342_114222_S	0.230138	0.176197	0.338199	0.105918	0.0664579	0.255558	0.60018	0.198204	0.525496	0.229047	0.146882	0.0152663	0.124045	0.293838	0.225095	0.81957	0.209875	0.875945	0.178746	0.163404	0.207135	0.0920265	0.324248	0.598115	0.156185	0.881348	0.0529295	0.726079	0.142608	0.557576	0.74328	0.221426	4.93891e-10	2.33215e-07	0.537327	0.762362	0.583106	0.152737	0.81451	0.877423	6.65625e-06	0.740455	0.0221036	0.628017	0.0599995	4.25509e-07	0.0119125	0.000111634	7.45505e-05
342_114338_S	0.0858442	0.282781	0.0172704	0.398109	0.343933	0.662823	0.601688	0.823992	0.44619	0.740597	0.283383	0.857634	0.0126362	0.928182	0.258238	0.130245	0.0801496	0.184095	0.123407	0.259477	0.0764759	0.637093	0.887732	0.10375	0.421961	0.104744	0.992807	0.961121	0.615821	0.0185707	0.0164817	0.0225535	0.0065137	0.0257987	0.21106	0.223138	0.382045	0.705079	0.505679	0.63765	0.349266	0.76795	0.850453	0.948005	0.115598	0.638442	0.772026	0.0195285	0.00565755
342_114488_S	0.418621	0.894011	0.723599	0.718937	0.854365	0.902082	0.953796	0.935809	0.546268	0.55525	0.822723	0.393671	0.249821	0.609944	0.795883	0.50267	0.629013	0.384196	0.421906	0.916648	0.720964	0.648696	0.578748	0.673343	0.935755	0.657827	0.430317	0.481848	0.305225	0.461069	0.562476	0.606221	0.738241	0.55165	0.952346	0.639212	0.881584	0.854381	0.501283	0.868746	0.162053	0.532613	0.344144	0.829771	0.963017	0.457756	0.346217	0.853534	0.994556
342_114543_S	0.718747	0.161749	0.636588	0.212612	0.299562	0.497758	0.987965	0.322313	0.841938	0.202886	0.483719	0.158274	0.0938987	0.25433	0.302177	0.509373	0.473529	0.805083	0.579707	0.150343	0.949601	0.1957	0.471995	0.902906	0.514713	0.969565	0.120646	0.348952	0.750318	0.466985	0.343883	0.374998	0.00146848	0.040307	0.810344	0.720202	0.914022	0.291467	0.854278	0.850741	0.0329388	0.635844	0.178427	0.918333	0.672833	0.0260021	0.326312	0.0546742	0.0435842
342_114684_S	0.094421	0.275085	0.0191913	0.407313	0.322841	0.681539	0.620671	0.805203	0.440075	0.733192	0.28078	0.872395	0.011533	0.972172	0.257148	0.133603	0.0838014	0.197152	0.134429	0.251806	0.0826068	0.646904	0.928868	0.108511	0.414483	0.111252	0.918679	0.967881	0.592608	0.020483	0.0184966	0.024886	0.0074096	0.0273665	0.22136	0.232335	0.397203	0.725553	0.516548	0.629885	0.361469	0.791632	0.758857	0.941182	0.120456	0.643996	0.788695	0.0211502	0.00637057
342_114688_S	0.126841	0.406166	0.127915	0.885802	0.673028	0.080336	0.245775	0.144806	0.684659	0.749587	0.809825	0.107313	0.118557	0.177991	0.388087	0.348027	0.00548099	0.0409404	0.140448	0.421292	0.196712	0.549649	0.229082	0.0715339	0.583628	0.0224069	0.0707656	0.150825	0.771235	0.0552246	0.0529786	0.0822428	0.537791	0.84031	0.0552962	0.135736	0.095622	0.875237	0.846279	0.498066	0.105333	0.586926	0.20312	0.778715	0.252153	0.034757	0.117658	0.583593	0.380882
83_144212_S	0.778123	0.547054	0.843505	0.235481	0.406955	0.530271	0.618081	0.390411	0.184162	0.718019	0.0602294	0.451065	0.88742	0.617508	0.36117	0.0923977	0.532713	0.599958	0.877456	0.541758	0.627513	0.350473	0.990737	0.253216	0.0885362	0.489689	0.953354	0.659252	0.133203	0.588204	0.566756	0.365224	0.0185119	0.0707151	0.55623	0.860322	0.519211	0.225614	0.126769	0.913041	0.452679	0.117005	0.739954	0.301592	0.603101	0.0291701	0.147316	0.0844387	0.0970702
83_144380_S	0.359095	0.245463	0.275001	0.608474	0.94134	0.683108	0.608175	0.621631	0.404085	0.759644	0.311438	0.591521	0.945007	0.896728	0.324622	0.603798	0.175015	0.514803	0.401452	0.243051	0.265284	0.514135	0.84927	0.675871	0.335973	0.400293	0.72903	0.0060438	0.882123	0.25386	0.662198	0.561824	0.681433	0.677274	0.769527	0.814427	0.834857	0.841681	0.812267	0.969816	0.626498	0.843608	0.951384	0.727643	0.189088	0.889703	0.731261	0.843736	0.883515
83_144881_S	0.334461	0.0910146	0.899881	0.434563	0.0764654	0.206506	0.252873	0.26745	0.766902	0.70144	0.380151	0.720314	0.180016	0.241759	0.72322	0.628762	0.103256	0.504466	0.304516	0.083162	0.950841	0.32875	0.158114	0.715421	0.320113	0.439217	0.439725	0.233469	0.776142	0.830702	0.690322	0.887556	0.195791	0.251843	0.279691	0.270933	0.355631	0.910423	0.566761	0.732852	0.762266	0.431647	0.209783	0.902071	0.657714	0.226274	0.611518	0.520904	0.491084
83_145083_S	0.0688036	0.661978	0.166335	0.072528	0.346485	0.716855	0.627286	0.726669	0.308523	0.116443	0.626546	0.596912	0.250388	0.582366	0.390402	0.26126	0.0771025	0.831878	0.0664673	0.678698	0.1758	0.0434769	0.399629	0.900854	0.957897	0.900205	0.496997	0.783986	0.0150009	0.771662	0.618721	0.785883	0.0470878	0.590309	0.40975	0.91378	0.376508	0.0722377	0.950646	0.427149	0.966174	0.821717	0.4785	0.867182	0.272576	0.080465	0.615903	0.374975	0.402645
203_203755_S	0.0435478	0.684659	0.135904	0.713732	0.0945178	0.0113078	0.0620582	0.0112582	0.0745035	0.313695	0.0503949	0.813984	0.289779	0.124612	0.736544	0.494744	0.724357	0.269322	0.0300973	0.653381	0.0954743	0.75962	0.164448	0.937117	0.0189277	0.431589	0.263167	0.398963	0.65872	0.0462979	0.0829009	0.0404472	0.511636	0.273079	0.0171601	0.118295	0.0125996	0.0421817	0.0972711	0.0238881	0.945658	0.101514	0.224775	0.248963	0.434353	0.880522	0.901413	0.109139	0.106124
203_203807_S	0.760503	0.904431	0.741106	0.995823	0.685889	0.922984	0.400518	0.98492	0.368643	0.987402	0.675397	0.692187	0.680676	0.209145	0.383352	0.622546	0.52432	0.493821	0.786917	0.903511	0.623752	0.880107	0.989598	0.558099	0.935375	0.468602	0.371129	0.151756	0.59364	0.742005	0.768037	0.395485	0.285394	0.0381712	0.702837	0.407998	0.890584	0.728272	0.517936	0.212133	0.8208	0.685875	0.127173	0.622446	0.254017	0.4798	0.33596	0.142207	0.153703
203_204329_S	0.0951746	0.985088	0.1375	0.683065	0.53855	0.457434	0.339084	0.652958	0.639415	0.636883	0.70847	0.953782	0.519209	0.215632	0.624702	0.88255	0.397463	0.886691	0.102568	0.995224	0.146589	0.621954	0.5821	0.877998	0.987476	0.871119	0.311654	0.450981	0.935974	0.831517	0.800329	0.761895	0.0692746	0.0335099	0.543898	0.372687	0.726754	0.893361	0.55207	0.28523	0.33062	0.709752	0.107839	0.397377	0.120736	0.0650086	0.09214	0.136777	0.183774
203_205101_S	2.56327e-06	0.724028	0.000126701	0.105244	0.546392	0.259019	0.0423535	0.515825	0.20592	0.150114	0.324523	0.589816	0.0292668	0.116791	0.374284	0.487251	0.0966353	0.635636	5.59858e-06	0.778229	0.000319523	0.063981	0.42705	0.596078	0.57229	0.682385	0.134116	0.613176	0.145003	0.0185159	0.0256276	0.0726389	0.175471	0.698749	0.136838	0.0249227	0.302776	0.388361	0.348173	0.50244	0.62397	0.115679	0.118735	0.442682	0.487652	0.139603	0.725217	0.650467	0.554678
203_205150_S	0.0876907	0.540192	0.0998827	0.380239	0.954699	0.193576	0.299275	0.275522	0.248722	0.770173	0.638955	0.0873412	0.69762	0.706321	0.65236	0.889096	0.752973	0.704202	0.0918198	0.553352	0.0976211	0.416405	0.837967	0.596487	0.392759	0.749809	0.28472	0.977689	0.269627	0.871616	0.612278	0.593963	0.012864	0.0337611	0.448456	0.71539	0.547474	0.755051	0.862381	0.892249	0.103399	0.540317	0.43957	0.913009	0.205703	0.164898	0.47197	0.140378	0.115203
203_205968_S	0.386723	0.709632	0.339733	0.907177	0.44566	0.824651	0.419748	0.987974	0.614208	0.818244	0.467839	0.960945	0.775279	0.182887	0.74243	0.842014	0.565332	0.86471	0.441944	0.69853	0.365723	0.861699	0.470956	0.746348	0.728372	0.824135	0.297651	0.460525	0.522179	0.876006	0.920684	0.586946	0.0968766	0.0236093	0.801523	0.418832	0.978853	0.858372	0.30664	0.119341	0.418576	0.514366	0.0678916	0.32007	0.0665865	0.0880859	0.0675135	0.0906621	0.13412
112_321732_S	0.648021	0.176864	0.390726	0.0623808	0.239577	0.117576	0.24545	0.0699334	0.173274	0.0336945	0.107415	0.206418	0.330594	0.231061	0.0450184	0.865864	0.692001	0.895543	0.997779	0.166291	0.157917	0.0818418	0.601144	0.37303	0.0719102	0.68335	0.125699	0.915574	0.849609	0.260583	0.659689	0.30835	0.000988145	0.00887181	0.70645	0.520971	0.615423	0.843338	0.809569	0.687488	0.016968	0.838111	0.0597856	0.983644	0.593275	0.0115209	0.184931	0.023538	0.0172708
112_323489_S	0.873607	0.66575	0.4462	0.430939	0.75074	0.46841	0.0655024	0.57707	0.830554	0.288369	0.126122	0.765128	0.0995249	0.917181	0.157359	0.0519096	0.587495	0.0417418	0.958643	0.68209	0.68661	0.519986	0.340627	0.0442095	0.394602	0.0432939	0.827235	0.191142	0.319881	0.631422	0.172667	0.683089	0.273345	0.794733	0.319443	0.0552641	0.432847	0.552327	0.849364	0.467177	0.74592	0.905245	0.610452	0.757442	0.517964	0.71639	0.525354	0.656323	0.515887
112_323745_S	0.948447	0.274501	0.227881	0.490185	0.80069	0.278589	0.303744	0.268382	0.256294	0.734517	0.679589	0.533115	0.946848	0.198282	0.972306	0.239171	0.671909	0.109115	0.94013	0.271355	0.242034	0.512013	0.37759	0.365708	0.430698	0.18187	0.18968	0.856989	0.649152	0.54535	0.975809	0.548549	0.0415887	0.0184512	0.744428	0.510449	0.749548	0.84484	0.566333	0.589763	0.303524	0.697713	0.0716092	0.427339	0.0232097	0.0568252	0.0278012	0.0531007	0.0786912
83_459657_SD	0.847038	0.855223	0.579131	0.562549	0.237395	0.0456246	0.139105	0.0441243	0.14199	0.95005	0.0687971	0.524546	0.986114	0.505796	0.413041	0.722002	0.252305	0.619392	0.747388	0.843886	0.367716	0.775623	0.751532	0.22584	0.0397796	0.50274	0.412191	0.624005	0.747848	0.358405	0.495402	0.710825	0.172524	0.165143	0.0772893	0.344836	0.0952219	0.527727	0.896657	0.0984721	0.492077	0.770032	0.328321	0.930318	0.450986	0.357826	0.661789	0.656771	0.567152
83_460830_S	0.021556	0.44518	0.0432183	0.0113903	0.242333	0.578976	0.786897	0.456687	0.175798	0.0091896	0.817903	0.49444	0.0577203	0.887838	0.0677103	0.169144	0.140375	0.345919	0.016544	0.471207	0.0372034	0.00725949	0.218036	0.521569	0.580375	0.341688	0.665273	0.613401	0.0096843	0.917906	0.575565	0.866153	0.0887295	0.987602	0.482854	0.865227	0.364781	0.0499713	0.35296	0.193622	0.669774	0.503421	0.895144	0.395581	0.118339	0.319244	0.597681	0.683733	0.633183
83_461217_S	0.558065	0.272261	0.319354	0.965455	0.0142117	0.175314	0.231873	0.162193	0.108314	0.444016	0.110755	0.706131	0.64057	0.60383	0.703721	0.369493	0.118347	0.325591	0.596771	0.262683	0.539916	0.770196	0.321033	0.14562	0.0803859	0.2877	0.55824	0.802273	0.686537	0.990264	0.979003	0.487774	0.0492906	0.0072492	0.301037	0.600722	0.377918	0.914165	0.337015	0.339223	0.490344	0.366467	0.274824	0.486874	0.383547	0.173451	0.35442	0.110483	0.0813963
83_461386_S	0.270381	0.695922	0.342865	0.78269	0.0629019	0.114615	0.170814	0.0887378	0.0488574	0.653203	0.0598857	0.802327	0.887676	0.729546	0.496595	0.407055	0.0469742	0.22646	0.352412	0.683837	0.645362	0.498031	0.663375	0.0696253	0.0374704	0.176042	0.69676	0.626899	0.767956	0.861776	0.837779	0.638445	0.114678	0.0267628	0.222063	0.518082	0.264829	0.637605	0.502945	0.201748	0.577313	0.538674	0.358373	0.719249	0.688174	0.344504	0.64469	0.249146	0.175938
83_461643_S	0.515969	0.2328	0.747086	0.377495	0.130393	0.438669	0.468365	0.357038	0.228806	0.832743	0.201818	0.406039	0.18333	0.997144	0.595589	0.374738	0.929589	0.622933	0.497178	0.217487	0.609018	0.456679	0.29015	0.792945	0.190708	0.838615	0.703835	0.722891	0.46089	0.735709	0.806302	0.491833	0.0304602	0.083118	0.798463	0.958458	0.763951	0.38789	0.249443	0.92766	0.523533	0.306177	0.954782	0.43322	0.918108	0.0541737	0.148638	0.12246	0.142404
168_494768_SD	0.793188	0.485486	0.877909	0.0123411	0.997289	0.279282	0.685465	0.169964	0.457047	0.550494	0.324118	0.254622	0.999348	0.23232	0.30451	0.513194	0.860766	0.205577	0.951862	0.482478	0.599438	0.0227374	0.455238	0.176667	0.263221	0.241345	0.684081	0.512782	0.372132	0.896513	0.539822	0.711528	0.119837	0.666692	0.364069	0.881993	0.251219	0.165794	0.399698	0.082038	0.347696	0.808491	0.176507	0.286869	0.163988	0.719381	0.152709	0.768261	0.923814
168_495863_S	0.374237	0.56498	0.869213	0.350959	0.0827718	0.703255	0.397678	0.344394	0.0528449	0.391052	0.00764861	0.33648	0.0278219	0.564315	0.0780046	0.317428	0.358486	0.118131	0.513383	0.525067	0.711659	0.531677	0.942738	0.0258319	0.0195669	0.0852033	0.978565	0.311367	0.359538	0.167249	0.501391	0.186126	0.00482328	0.0183378	0.832629	0.454695	0.600803	0.835795	0.968932	0.361461	0.131237	0.405389	0.917705	0.432872	0.784887	0.312577	0.709663	0.0651044	0.0214488
168_496247_S	0.505459	0.286072	0.86003	0.205851	0.112976	0.646719	0.384207	0.957552	0.669238	0.164332	0.357987	0.721765	0.19641	0.117104	0.0262517	0.891074	0.751572	0.08383	0.656094	0.276355	0.719398	0.208108	0.870975	0.118595	0.643449	0.101135	0.276226	0.503699	0.13098	0.267634	0.187396	0.370939	0.0167271	0.260795	0.786678	0.521693	0.846993	0.880222	0.526988	0.166537	0.392961	0.719221	0.363956	0.135942	0.483781	0.613207	0.119764	0.320896	0.119125
168_496274_S	0.725273	0.360933	0.92983	0.098398	0.9163	0.0995165	0.128298	0.0896606	0.180851	0.763689	0.618523	0.515545	0.804479	0.511225	0.617925	0.444345	0.969587	0.737605	0.684582	0.35695	0.875799	0.143957	0.979672	0.987756	0.290432	0.721905	0.427631	0.627482	0.795299	0.379244	0.710006	0.33108	0.913311	0.224503	0.233472	0.363682	0.222689	0.0844306	0.562053	0.302918	0.445658	0.871593	0.40211	0.714649	0.825504	0.425427	0.527321	0.30969	0.349489
168_496343_S	0.824662	0.0926607	0.907856	0.00426003	0.391044	0.395522	0.455128	0.275888	0.46676	0.56725	0.457193	0.725378	0.616404	0.161045	0.316936	0.806483	0.933855	0.25263	0.957641	0.0891335	0.797233	0.00811581	0.964355	0.24653	0.367338	0.304541	0.337268	0.537558	0.554921	0.98626	0.527737	0.830056	0.0564018	0.865208	0.480026	0.707695	0.350328	0.20525	0.43316	0.187124	0.903204	0.782108	0.265225	0.276793	0.593736	0.807283	0.179738	0.96837	0.730188
7_1171190_S	0.560949	0.754114	0.412303	0.201869	0.411842	0.326967	0.476807	0.488502	0.015927	0.716808	0.00552449	0.967435	0.113633	0.698648	0.519161	0.0829243	0.110043	0.0746005	0.512254	0.791147	0.631467	0.413688	0.486756	0.0148552	0.0115758	0.0596847	0.77101	0.679483	0.575551	0.707629	0.378073	0.282213	0.0164016	0.0411155	0.49575	0.513968	0.633854	0.735827	0.619471	0.426544	0.547539	0.802958	0.701116	0.611181	0.599446	0.344175	0.645881	0.12223	0.0764396
7_1171233_S	0.445689	0.715143	0.880075	0.0192125	0.271366	0.0633916	0.308302	0.0993146	0.283447	0.0292655	0.0388283	0.658073	0.00763792	0.0788045	0.0415924	0.114714	0.119426	0.0924537	0.253707	0.657949	0.593974	0.0594487	0.727708	0.0128831	0.0386049	0.0345047	0.108366	0.835253	0.290422	0.707424	0.651699	0.83679	0.0341468	0.463351	0.0615664	0.166763	0.0615999	0.332275	0.12854	0.0913446	0.805817	0.387417	0.143474	0.123516	0.231564	0.296318	0.110381	0.839012	0.449238
7_1171268_S	0.10348	0.498383	0.56749	0.477151	0.598924	0.268197	0.0769987	0.242102	0.299454	0.191071	0.19508	0.521396	0.00131638	0.675051	0.0993704	0.234862	0.851569	0.468593	0.0810943	0.559322	0.31232	0.521959	0.855219	0.205316	0.156247	0.346126	0.531935	0.289613	0.567331	0.479166	0.185358	0.298276	0.791728	0.270111	0.325763	0.104484	0.345119	0.220201	0.539748	0.284739	0.917035	0.135472	0.481946	0.346231	0.0374392	0.605144	0.31198	0.2532	0.313625
7_1171324_S	0.463361	0.373541	0.389604	0.332873	0.822817	0.0989987	0.106108	0.0787104	0.92464	0.0179754	0.538917	0.902547	0.028704	0.445339	0.0211594	0.247712	0.572427	0.399629	0.261926	0.411353	0.138973	0.411685	0.513741	0.166056	0.368935	0.203376	0.57924	0.939588	0.285327	0.219893	0.183429	0.129674	0.45545	0.0267967	0.0702804	0.0701067	0.0499138	0.105346	0.0180937	0.0804887	0.325635	0.0356917	0.783392	0.00803504	0.000878031	0.00878573	0.00317041	0.0236807	0.0679818
7_1171370_S	0.567161	0.424309	0.987046	0.0389778	0.681439	0.221775	0.517758	0.219897	0.500129	0.00762822	0.0383735	0.891366	0.00469346	0.155921	0.0027948	0.00363604	0.0762171	0.00718399	0.326538	0.468125	0.407098	0.107225	0.196797	0.00111435	0.0625717	0.00194931	0.231936	0.317673	0.0148537	0.819933	0.687171	0.796008	0.0163415	0.412608	0.264827	0.360193	0.270975	0.93207	0.218316	0.243875	0.989496	0.590846	0.205547	0.158375	0.0110646	0.470799	0.0869945	0.709127	0.366666
7_1171525_S	0.700543	0.516638	0.867792	0.808282	0.680753	0.857886	0.979436	0.672313	0.156205	0.173755	0.537596	0.774866	0.436546	0.594281	0.184594	0.378185	0.670449	0.64407	0.884954	0.528864	0.618713	0.82491	0.672748	0.662873	0.561752	0.470749	0.766915	0.883405	0.30038	0.586183	0.577996	0.489698	0.847384	0.313481	0.609753	0.735986	0.492903	0.965595	0.142298	0.621198	0.376331	0.492177	0.560508	0.107319	0.0080453	0.103993	0.0552647	0.284306	0.428674
7_1171762_S	0.869654	0.300553	0.822389	0.186179	0.904123	0.315877	0.657953	0.327932	0.568401	0.0182133	0.0482983	0.832319	0.0406775	0.305262	0.0075743	0.00456784	0.0415068	0.014167	0.797293	0.326393	0.599636	0.378319	0.168588	0.00247262	0.0882911	0.00397671	0.469617	0.367656	0.0638518	0.905236	0.700958	0.691484	0.0289569	0.333675	0.312472	0.406112	0.32927	0.999954	0.2899	0.28575	0.838064	0.622358	0.306339	0.230028	0.0239422	0.465223	0.135617	0.630277	0.330586
7_1171919_S	0.47217	0.457275	0.318649	0.139241	0.980707	0.108574	0.229877	0.0797911	0.822663	0.0291973	0.311269	0.747853	0.251385	0.651086	0.0257328	0.370804	0.460607	0.157676	0.280803	0.481562	0.116032	0.21064	0.410263	0.0669875	0.231293	0.0930221	0.828849	0.670202	0.187194	0.197134	0.377895	0.233915	0.790451	0.222815	0.0747137	0.141171	0.0567589	0.167149	0.0482516	0.0655063	0.381331	0.201444	0.82744	0.023339	0.0046505	0.033902	0.00633906	0.113254	0.278111
7_1172074_S	0.903641	0.501482	0.592669	0.15047	0.710109	0.250974	0.550822	0.279986	0.499317	0.0431475	0.0788276	0.722851	0.0212507	0.226721	0.0228137	0.0168302	0.059155	0.0271838	0.631359	0.544476	0.852782	0.312274	0.286058	0.00577417	0.106786	0.00922524	0.435934	0.453572	0.156492	0.982061	0.384011	0.563524	0.0588664	0.458223	0.181168	0.303593	0.177618	0.596589	0.24568	0.200348	0.723426	0.619924	0.293781	0.197395	0.0466272	0.33839	0.107509	0.703311	0.360292
7_1172184_S	0.83858	0.71469	0.504277	0.737119	0.307182	0.263038	0.356816	0.329132	0.506214	0.207607	0.180922	0.106964	0.0263557	0.201054	0.208962	0.103214	0.112405	0.195229	0.654304	0.770268	0.861329	0.991137	0.887791	0.062314	0.186339	0.0971855	0.675766	0.883042	0.329327	0.57502	0.897218	0.866406	0.255196	0.774365	0.155145	0.240954	0.153361	0.642539	0.248661	0.201813	0.13989	0.54728	0.220514	0.221597	0.0854104	0.312777	0.131501	0.826801	0.847791
7_1172354_S	0.243985	0.500514	0.91685	0.348246	0.951425	0.00372027	0.000332724	0.00811723	0.00331942	0.60024	0.0163666	0.743217	0.106706	0.924881	0.547536	0.67947	0.55075	0.793738	0.17598	0.547775	0.596116	0.526469	0.6649	0.176376	0.00281984	0.62786	0.82312	0.297269	0.539815	0.235738	0.112316	0.147241	0.107812	0.0131807	0.00675148	0.00153972	0.00754151	0.000198075	0.157817	0.00805128	0.471094	0.0110736	0.344779	0.084528	0.196728	0.0245666	0.0565971	0.015503	0.0330337
7_1172369_S	0.46024	0.366956	0.641711	0.128254	0.881065	0.258436	0.511332	0.277625	0.497924	0.0473319	0.110785	0.998618	0.0311297	0.113319	0.0346542	0.0626321	0.211381	0.0577157	0.301218	0.401489	0.30903	0.232754	0.295636	0.0176247	0.131597	0.0272352	0.205633	0.605537	0.164283	0.683338	0.799426	0.956498	0.0534248	0.590917	0.221062	0.325111	0.210654	0.681966	0.262858	0.25164	0.985658	0.73793	0.133429	0.208499	0.0823283	0.549338	0.156783	0.895053	0.569929
7_1172444_S	0.394773	0.431455	0.48717	0.242439	0.650687	0.0217535	0.0299736	0.0280118	0.633275	0.0836782	0.47511	0.951302	0.137203	0.252544	0.153871	0.661831	0.371956	0.666806	0.232467	0.468856	0.233022	0.353539	0.529595	0.264541	0.221918	0.402739	0.346287	0.289186	0.832	0.138018	0.200189	0.086485	0.140259	0.00354314	0.00943025	0.0180122	0.0058462	0.00672675	0.00455983	0.0175793	0.170925	0.0125122	0.729897	0.00223715	0.00881916	0.000297587	0.000614428	0.00364374	0.0166055
7_1172657_S	0.408225	0.319667	0.407115	0.442072	0.40057	0.00317505	0.000165537	0.011521	0.0484057	0.315798	0.308488	0.610318	0.532616	0.478853	0.408901	0.408754	0.994933	0.888769	0.261677	0.346558	0.227782	0.537499	0.511777	0.510508	0.0602374	0.961268	0.775314	0.643503	0.903347	0.0982374	0.0384891	0.0367503	0.0248181	0.000329186	0.00265035	0.000536769	0.0033529	0.000350993	0.0500504	0.0111093	0.350493	0.00252765	0.743127	0.0183278	0.0861241	0.00854869	0.00884512	0.000828821	0.00235429
7_1172786_S	0.298875	0.440196	0.173251	0.857851	0.750668	0.3855	0.777116	0.428075	0.179275	0.115951	0.423136	0.962279	0.58727	0.106019	0.322238	0.885689	0.931789	0.96105	0.219304	0.451035	0.133513	0.80054	0.907889	0.959937	0.585376	0.791616	0.204548	0.979343	0.234747	0.0480645	0.178592	0.0510894	0.55912	0.0498041	0.20089	0.489246	0.185568	0.729294	0.0500106	0.437691	0.473846	0.368165	0.178645	0.0652557	0.0406664	0.108739	0.0444566	0.0335768	0.0510249
7_1173068_S	0.0871832	0.990742	0.656457	0.437086	0.429738	0.00753257	0.0008033	0.0144204	0.00513666	0.874292	0.0346517	0.670779	0.00292821	0.887084	0.922046	0.543148	0.783812	0.814326	0.0749295	0.909681	0.937065	0.595163	0.720648	0.398703	0.00701769	0.994347	0.936388	0.236906	0.372122	0.504819	0.21474	0.371049	0.248794	0.0620915	0.0120969	0.00228873	0.0134316	0.000472788	0.241452	0.014199	0.415198	0.0195896	0.903828	0.132626	0.304703	0.0404034	0.0898228	0.0669317	0.130865
7_1173102_S	0.058155	0.885733	0.867707	0.337783	0.490477	0.012611	0.00167701	0.0262637	0.0163206	0.798144	0.0482463	0.790659	0.00685723	0.974064	0.776293	0.836024	0.823903	0.983144	0.051515	0.960326	0.859281	0.461934	0.861702	0.332335	0.0132457	0.828133	0.883956	0.25074	0.429057	0.320435	0.173436	0.230617	0.190161	0.0405833	0.0150894	0.00391481	0.0175481	0.0011911	0.23494	0.0211815	0.528049	0.0247583	0.408277	0.146476	0.315649	0.0572482	0.11718	0.0441511	0.0777019
7_1173247_S	0.310229	0.949129	0.674565	0.147197	0.986808	0.0363177	0.0457798	0.0389285	0.624368	0.18517	0.477729	0.823485	0.0850765	0.325779	0.268257	0.802961	0.492891	0.838986	0.204412	0.999022	0.387667	0.221548	0.847143	0.384659	0.241746	0.568868	0.382752	0.158517	0.951821	0.204173	0.312462	0.133192	0.2583	0.00932428	0.0153412	0.0264289	0.00900917	0.00680402	0.0156356	0.0227104	0.248797	0.0366053	0.869703	0.00814268	0.0159059	0.00133286	0.0031433	0.0117026	0.038772
9_1264427_S	0.662846	0.564587	0.468751	0.0626881	0.178776	0.782994	0.248029	0.94996	0.18786	0.681516	0.910918	0.0311499	0.112623	0.206929	0.660312	0.726442	0.140547	0.689318	0.752545	0.598457	0.460976	0.0398685	0.255234	0.939739	0.868737	0.987092	0.968207	0.971542	0.0178681	0.705738	0.121576	0.372111	0.130357	0.626021	0.877914	0.369372	0.947997	0.113264	0.787425	0.890983	0.0322742	0.307614	0.209388	0.732994	0.859607	0.173794	0.90373	0.417462	0.36282
9_1264687_S	0.948865	0.741595	0.982065	0.136244	0.317943	0.430725	0.945828	0.664088	0.227136	0.601039	0.908666	0.154831	0.45111	0.113048	0.860011	0.920832	0.211615	0.815191	0.938427	0.754903	0.976393	0.0963078	0.432628	0.926986	0.903882	0.962809	0.534552	0.729756	0.0907647	0.994045	0.647431	0.691625	0.125886	0.428067	0.382523	0.71529	0.48144	0.263469	0.972057	0.969863	0.111884	0.569573	0.170742	0.556138	0.604402	0.146921	0.635812	0.453719	0.430625
9_1264886_S	0.82405	0.423789	0.731855	0.372646	0.586314	0.321726	0.0299559	0.30759	0.922362	0.656887	0.782134	0.215945	0.116188	0.0226029	0.312397	0.532484	0.406557	0.388408	0.951567	0.458796	0.516965	0.329573	0.975527	0.370225	0.860909	0.324833	0.0169594	0.23933	0.294016	0.619123	0.552992	0.557858	0.457013	0.202504	0.117187	0.0190665	0.125741	0.298156	0.935157	0.575898	0.373958	0.399982	0.0959265	0.879585	0.233951	0.813145	0.628183	0.540292	0.360366
9_1265027_S	0.743004	0.538802	0.969824	0.923932	0.872194	0.607547	0.940751	0.509745	0.852059	0.909527	0.793459	0.759126	0.898384	0.037321	0.857644	0.271336	0.749552	0.325984	0.810327	0.54157	0.932329	0.88014	0.561382	0.419189	0.720299	0.417712	0.0716872	0.985869	0.98104	0.723122	0.558725	0.799465	0.534418	0.953141	0.456716	0.954518	0.269189	0.188439	0.600088	0.085439	0.716009	0.816469	0.0779125	0.416133	0.55999	0.410928	0.11192	0.877426	0.775132
9_1265081_S	0.744186	0.542117	0.969651	0.915429	0.877318	0.603538	0.934861	0.506191	0.846654	0.9253	0.789922	0.754447	0.896962	0.0361376	0.874823	0.268285	0.754258	0.333752	0.809659	0.544971	0.935838	0.872718	0.568637	0.426313	0.715823	0.427629	0.0696533	0.991601	0.985145	0.723475	0.561767	0.799054	0.537081	0.959169	0.452761	0.95031	0.266089	0.185477	0.608466	0.0843216	0.711136	0.817336	0.0758809	0.426061	0.546391	0.416468	0.117378	0.880987	0.773454
9_1266000_SD	0.146279	0.657802	0.106235	0.418092	0.0852201	0.440374	0.501489	0.656806	0.41535	0.145247	0.162215	0.644196	0.00644169	0.290316	0.00437442	0.0205564	0.0798863	0.00432214	0.24321	0.615146	0.427799	0.662778	0.717108	0.00314471	0.347741	0.00202363	0.525064	0.809148	0.622667	0.0819252	0.122258	0.106048	0.123153	0.0639229	0.198188	0.263836	0.280933	0.492583	0.778647	0.962891	0.671582	0.346282	0.20458	0.138357	0.0381004	0.832314	0.175774	0.137559	0.0467273
9_1266031_SD	0.330973	0.48844	0.26267	0.222473	0.928638	0.83769	0.389436	0.580611	0.374522	0.289928	0.939684	0.332495	0.755888	0.719654	0.425813	0.469714	0.863087	0.194504	0.457323	0.489285	0.396625	0.245332	0.593855	0.335658	0.742254	0.219938	0.469173	0.643683	0.384675	0.469957	0.24558	0.405816	0.74585	0.754154	0.79796	0.828128	0.815088	0.612536	0.186603	0.803628	0.801729	0.399171	0.589806	0.157524	0.268371	0.579823	0.125403	0.815151	0.531752
48_2128606_SD	0.644906	0.549191	0.782821	0.2015	0.834949	0.973728	0.675914	0.477485	0.20326	0.240858	0.0172617	0.730491	0.146089	0.000524467	0.039697	0.0224411	0.553416	0.154099	0.79802	0.570017	0.428254	0.301514	0.233389	0.0466395	0.0588729	0.104983	0.00356671	0.56379	0.128517	0.425992	0.642217	0.441864	0.227851	0.514921	0.642946	0.6334	0.91374	0.353355	0.91576	0.162045	0.947582	0.982498	0.0171746	0.709024	0.000307555	0.911142	0.444195	0.555321	0.35439
48_2129343_S	0.782644	0.887054	0.956655	0.256853	0.619046	0.141426	0.877984	0.0773923	0.44537	0.907862	0.063377	0.226971	0.332324	0.99679	0.947986	0.796307	0.0611277	0.879206	0.702488	0.867733	0.789411	0.186587	0.579789	0.844268	0.0722251	0.690345	0.583346	0.858847	0.114058	0.0859531	0.171768	0.0986314	0.00232682	0.014435	0.641908	0.84203	0.429471	0.756378	0.593723	0.14818	0.0828501	0.557746	0.668123	0.543195	0.368132	0.0203384	0.224491	0.0179307	0.00946273
48_2129749_S	0.139925	0.841709	0.205115	0.13645	0.999362	0.83924	0.360427	0.442602	0.61954	0.469517	0.0219253	0.855363	0.929915	0.101218	0.0807011	0.000152356	0.342929	0.0627454	0.21158	0.851253	0.547899	0.223603	0.2065	0.0289537	0.0968035	0.0520952	0.220357	0.340744	0.0686388	0.239792	0.233497	0.213198	0.177034	0.29504	0.427706	0.434984	0.631668	0.981189	0.472534	0.540155	0.607206	0.44073	0.213203	0.708571	0.00833611	0.876721	0.965373	0.237747	0.169594
7_2189043_S	0.0274659	0.423496	0.0936329	0.849431	0.214685	0.273583	0.856613	0.294541	0.94039	0.993535	0.825453	0.178885	0.921007	0.327746	0.598788	0.0913156	0.00368058	0.220564	0.0374359	0.424127	0.146189	0.520889	0.156882	0.215878	0.680089	0.114324	0.860843	0.213671	0.513186	0.755808	0.813059	0.845822	0.024903	0.00764514	0.78396	0.653019	0.92178	0.303116	0.313535	0.770475	0.0178907	0.381996	0.848986	0.110977	0.00279567	4.99838e-05	0.00235652	0.0493602	0.106904
7_2189133_S	0.035579	0.433861	0.0466654	0.28512	0.73357	0.938177	0.925801	0.998228	0.855944	0.584997	0.760595	0.353527	0.0753277	0.136312	0.574453	0.0463431	0.00381141	0.458289	0.0667414	0.461234	0.112333	0.138951	0.508624	0.221978	0.802363	0.184481	0.470976	0.60677	0.361812	0.381278	0.698339	0.474237	0.264278	0.387152	0.750901	0.710634	0.641148	0.543454	0.446903	0.653272	0.0902821	0.469135	0.353759	0.387663	0.0344818	0.0106207	0.100651	0.580606	0.807364
7_2190290_S	0.000159823	0.602834	0.00266578	0.0622611	0.728046	0.0441459	0.473062	0.0497912	0.210733	0.188868	0.043745	0.110774	0.0446609	0.859152	0.0763935	0.0420552	0.000559972	0.129974	0.000740849	0.63177	0.0157768	0.0255578	0.497859	0.21785	0.0348575	0.0272486	0.564552	0.00201084	0.118711	0.00117031	0.0579294	0.00359568	0.360827	0.312535	0.129544	0.787833	0.141033	0.129222	0.674545	0.0196293	0.112367	0.21689	0.954203	0.444809	0.0952863	0.0363737	0.181274	0.172172	0.0899255
7_2190713_S	0.00935361	0.372735	0.017907	0.0401119	0.924835	0.587298	0.910867	0.789348	0.889682	0.918575	0.925373	0.103154	0.100101	0.288414	0.452552	0.0373674	0.000137482	0.428763	0.0156767	0.396866	0.0548663	0.0103637	0.644223	0.21414	0.890029	0.13948	0.911009	0.344574	0.116239	0.175177	0.629614	0.307562	0.0301607	0.398538	0.755497	0.924563	0.968872	0.512791	0.850269	0.988324	0.00975449	0.409181	0.628266	0.443134	0.120208	0.00155123	0.1052	0.583306	0.77173
7_2191068_S	0.370295	0.821913	0.148519	0.163374	0.143381	0.1042	0.7574	0.169346	0.968553	0.504574	0.582966	0.285239	0.0253538	0.197323	0.687113	0.111246	0.283013	0.892406	0.556274	0.778752	0.317575	0.140193	0.402579	0.498301	0.450301	0.594883	0.129594	0.371351	0.268871	0.206353	0.460417	0.113613	0.358585	0.0332253	0.317587	0.922811	0.313991	0.659301	0.841972	0.805771	0.265873	0.696786	0.276956	0.504063	0.687457	0.393875	0.233666	0.0825916	0.0718381
7_2191250_S	0.0013681	0.108148	0.0147142	0.0174294	0.122558	0.115319	0.289299	0.112297	0.226432	0.314929	0.0813437	0.113923	0.221059	0.970377	0.246705	0.113903	0.00202607	0.38254	0.00410149	0.112658	0.0424408	0.00775733	0.213949	0.458324	0.0671993	0.129091	0.45821	0.000401108	0.121382	0.0504937	0.210184	0.103703	0.0115785	0.359826	0.216462	0.360039	0.255103	0.462994	0.409389	0.157357	0.0698892	0.263379	0.674742	0.399532	0.188233	0.00502576	0.107925	0.784093	0.922559
7_2191312_S	0.257523	0.750464	0.118372	0.121362	0.278789	0.0602544	0.0750692	0.0476179	0.0104226	0.573464	0.0301235	0.241071	0.445267	0.974544	0.49458	0.612699	0.460597	0.540706	0.213367	0.749517	0.0808484	0.15097	0.883496	0.268677	0.0136421	0.689522	0.579097	0.0513193	0.482541	0.359102	0.363262	0.425079	0.0596759	0.290093	0.145367	0.151977	0.137353	0.104296	0.91283	0.133027	0.135482	0.96394	0.65406	0.7628	0.742945	0.206631	0.866052	0.772403	0.655329
7_2191654_S	0.000966228	0.117003	0.00858177	0.016974	0.248475	0.103428	0.27624	0.091388	0.212492	0.351908	0.0976196	0.0932078	0.240481	0.891978	0.23339	0.0384575	0.000852927	0.155684	0.00294058	0.121433	0.0281238	0.0067491	0.212647	0.245221	0.0721781	0.0456856	0.517655	8.39876e-05	0.191362	0.0445577	0.219882	0.0842184	0.0095219	0.438348	0.204996	0.353938	0.224703	0.414612	0.630832	0.137778	0.0550675	0.355155	0.764997	0.65098	0.132269	0.00599216	0.131043	0.852773	0.983379
7_2192024_S	0.011386	0.304359	0.0325628	0.206927	0.709667	0.37502	0.745666	0.421899	0.571777	0.381425	0.594018	0.235082	0.0245936	0.145519	0.126864	0.0212779	0.000354541	0.147099	0.02549	0.331449	0.112202	0.0859758	0.376253	0.103991	0.495753	0.031508	0.532453	0.0384892	0.232402	0.0719745	0.260308	0.122931	0.15734	0.736304	0.538988	0.829017	0.67999	0.99733	0.77888	0.728032	0.0269881	0.41377	0.30217	0.423437	0.0935645	0.00494777	0.0844303	0.992487	0.727859
7_2192648_S	0.538648	0.0587319	0.999838	0.374993	0.108621	0.918718	0.344097	0.884362	0.581633	0.82322	0.97971	0.873659	0.967708	0.920551	0.719016	0.924162	0.959443	0.965441	0.605177	0.057956	0.919669	0.426583	0.277945	0.902817	0.856042	0.929495	0.879376	0.188498	0.917138	0.340345	0.81934	0.330163	0.0266621	0.016285	0.835127	0.200059	0.883569	0.6686	0.636888	0.461556	0.599254	0.769898	0.587128	0.8855	0.719956	0.211565	0.432494	0.0600544	0.0467134
7_2192993_S	0.326988	0.502785	0.0623373	0.676059	0.224906	0.783136	0.809874	0.759426	0.712518	0.588742	0.668756	0.410449	0.146537	0.260236	0.559267	0.547944	0.0937254	0.693658	0.430612	0.479791	0.150165	0.497495	0.561538	0.406987	0.663369	0.433234	0.20287	0.373277	0.579872	0.380823	0.306354	0.156371	0.914368	0.510772	0.611285	0.773831	0.596021	0.610335	0.402614	0.512397	0.391473	0.246909	0.26275	0.392616	0.298323	0.179289	0.259841	0.667751	0.417622
7_2194080_S	0.00203213	0.794594	0.142195	0.185256	0.359108	0.0198797	0.20674	0.0129535	0.00743228	0.931923	0.00594236	0.141155	0.434465	0.735814	0.926658	0.394922	0.0895386	0.952631	0.00279329	0.820733	0.122225	0.170571	0.790497	0.527288	0.00288212	0.722227	0.693844	0.059056	0.419673	0.0472021	0.209009	0.0692175	0.599663	0.505906	0.0985142	0.597183	0.0681168	0.0107792	0.593819	0.00564046	0.125414	0.7354	0.96372	0.71939	0.815949	0.47387	0.863406	0.246112	0.274897
7_2194931_S	0.0238482	0.479894	0.089128	0.0587408	0.0918621	0.121568	0.193316	0.113129	0.051383	0.332057	0.0835299	0.200456	0.259525	0.878389	0.314172	0.556625	0.229451	0.618684	0.0213697	0.456119	0.0584044	0.062869	0.487987	0.3613	0.0512628	0.720722	0.482357	0.160711	0.542331	0.421207	0.494408	0.532514	0.0278867	0.16837	0.236963	0.246675	0.244203	0.272501	0.921104	0.263765	0.111598	0.980789	0.690172	0.800913	0.666788	0.125296	0.722719	0.551599	0.462989
7_2195659_S	0.0200051	0.38479	0.093023	0.174078	0.0509127	0.175628	0.240029	0.190845	0.101825	0.539268	0.14893	0.19278	0.279961	0.850579	0.577227	0.570381	0.174436	0.821515	0.0213512	0.363544	0.0786091	0.15848	0.305432	0.580631	0.100942	0.961426	0.458358	0.155222	0.739174	0.462677	0.355672	0.647871	0.0322023	0.0773885	0.27357	0.273193	0.3117	0.409999	0.786542	0.397763	0.106657	0.653344	0.664984	0.722469	0.367559	0.0603631	0.343357	0.379526	0.361895
10_2334801_S	0.0178372	0.819417	0.0862825	0.782964	0.396687	0.969917	0.686752	0.819499	0.940915	0.679771	0.781169	0.122771	0.5621	0.643193	0.716648	0.353241	0.444866	0.485219	0.0277389	0.833381	0.168771	0.887564	0.334488	0.528055	0.856018	0.494252	0.286007	0.827267	0.558643	0.139456	0.128953	0.153123	0.265066	0.431841	0.758303	0.575563	0.917522	0.771043	0.432432	0.953801	0.108039	0.465803	0.522445	0.716734	0.426166	0.781927	0.8216	0.233086	0.1847
10_2334901_S	0.347175	0.838174	0.119995	0.319761	0.743838	0.667508	0.552716	0.541623	0.588802	0.740435	0.668604	0.171581	0.0530222	0.733803	0.60954	0.835697	0.0424928	0.742774	0.402048	0.878895	0.193008	0.198103	0.89285	0.5615	0.760991	0.43666	0.730716	0.229799	0.235482	0.338473	0.529207	0.324568	0.798454	0.509223	0.637161	0.666291	0.529156	0.731184	0.458847	0.274454	0.122712	0.160979	0.494764	0.344484	0.883038	0.144492	0.274955	0.579139	0.418974
10_2334953_S	0.0135351	0.797786	0.0634083	0.748569	0.43395	0.907664	0.602497	0.883928	0.875503	0.759209	0.778093	0.129115	0.622092	0.678252	0.614436	0.288022	0.352811	0.387249	0.0225039	0.810934	0.140696	0.871317	0.318229	0.434057	0.88445	0.383068	0.309258	0.933605	0.607751	0.136167	0.120772	0.147652	0.251645	0.423722	0.748361	0.554291	0.904386	0.722505	0.474162	0.944381	0.11402	0.500275	0.553225	0.782222	0.349816	0.858378	0.919872	0.234671	0.177477
10_2335092_S	0.0678043	0.308195	0.0936077	0.00653233	0.0616652	0.0915914	0.359431	0.091315	0.538204	0.078159	0.129977	0.894081	0.749931	0.212716	0.518699	0.463613	0.196576	0.583458	0.0421174	0.309105	0.0720643	0.00645814	0.0800079	0.4298	0.109556	0.725082	0.3498	0.758302	0.00325526	0.454477	0.696844	0.798974	0.0624852	0.540159	0.451239	0.558535	0.465257	0.482177	0.227726	0.129858	0.912337	0.905328	0.201456	0.367705	0.162705	0.950985	0.168493	0.681977	0.93981
10_2335191_S	0.303818	0.927634	0.12808	0.298327	0.831273	0.503624	0.576087	0.361768	0.703385	0.912509	0.380651	0.258603	0.14782	0.344588	0.982751	0.830767	0.151828	0.971192	0.317067	0.896215	0.155161	0.22012	0.764912	0.986802	0.482775	0.781902	0.811089	0.295612	0.153664	0.182847	0.326976	0.188895	0.6122	0.466159	0.415012	0.756042	0.332171	0.566694	0.844436	0.132901	0.192171	0.344789	0.204213	0.640486	0.769202	0.363054	0.591231	0.354069	0.278961
10_2335303_S	0.379474	0.376449	0.254748	0.00746441	0.103295	0.0629988	0.202606	0.0380347	0.258418	0.43936	0.0386439	0.985131	0.439515	0.286118	0.447664	0.965545	0.622251	0.327925	0.292957	0.37378	0.157795	0.0115233	0.0581931	0.181512	0.0320062	0.444837	0.398633	0.862915	0.00430505	0.371006	0.790177	0.511232	0.243565	0.197134	0.22086	0.317983	0.19593	0.177039	0.433729	0.041869	0.927016	0.804587	0.253275	0.318555	0.0645174	0.600076	0.0918362	0.316385	0.523693
10_2335305_S	0.0342345	0.646633	0.0349915	0.934628	0.692478	0.982053	0.770918	0.816687	0.647785	0.385278	0.44499	0.137588	0.560906	0.218214	0.898518	0.200047	0.240813	0.630197	0.0414612	0.660202	0.066689	0.895175	0.522622	0.533357	0.544943	0.604459	0.0970923	0.714975	0.239548	0.131955	0.163463	0.127198	0.30175	0.29834	0.779553	0.627579	0.914981	0.905907	0.306289	0.985018	0.122009	0.443943	0.186442	0.469681	0.487644	0.757949	0.528614	0.172793	0.150324
10_2335527_S	0.679709	0.434915	0.573133	0.00354099	0.372903	0.0468267	0.65198	0.0175007	0.486931	0.887717	0.0278213	0.223855	0.0278939	0.180079	0.967255	0.570711	0.0360143	0.932464	0.5787	0.462495	0.458286	0.00246446	0.331887	0.775638	0.0324954	0.680995	0.608582	0.322131	0.0505583	0.997738	0.339223	0.723241	0.0231184	0.826778	0.372599	0.99872	0.261052	0.419457	0.586556	0.0380927	0.0305661	0.102104	0.203539	0.665552	0.188694	0.080126	0.745253	0.579191	0.479046
10_2335548_S	0.416308	0.92501	0.556173	0.469654	0.746235	0.685383	0.993845	0.618699	0.408087	0.340417	0.550801	0.614005	0.962191	0.20458	0.917538	0.316098	0.470921	0.808812	0.370886	0.924033	0.552364	0.454383	0.856046	0.968327	0.512251	0.790086	0.213903	0.527599	0.815139	0.635042	0.576501	0.466931	0.166558	0.349375	0.588731	0.645351	0.618999	0.985853	0.924027	0.99878	0.87867	0.936735	0.344432	0.805881	0.912866	0.473677	0.7773	0.34775	0.313719
10_2335586_S	0.339506	0.450388	0.350631	0.00486822	0.557382	0.0263149	0.278098	0.00902883	0.561186	0.884634	0.0460005	0.150043	0.180569	0.256505	0.999783	0.350592	0.0210779	0.959107	0.289556	0.463645	0.266635	0.00284638	0.511644	0.861646	0.0352222	0.595621	0.800046	0.37849	0.0403434	0.735733	0.798703	0.960383	0.0403855	0.991413	0.162216	0.356633	0.105643	0.269985	0.765499	0.0242898	0.022661	0.242549	0.221438	0.86079	0.34515	0.0932131	0.856906	0.835042	0.708885
10_2335663_S	0.195979	0.113257	0.154431	0.065879	0.0344957	0.254953	0.975632	0.200887	0.432422	0.985546	0.147102	0.987648	0.175605	0.491389	0.902847	0.73295	0.92981	0.422147	0.209132	0.106371	0.17618	0.090169	0.0409977	0.367108	0.156557	0.598535	0.586967	0.573371	0.00726549	0.298122	0.50073	0.473172	0.649296	0.0787327	0.661473	0.664127	0.613501	0.387004	0.894094	0.107039	0.765812	0.276142	0.223851	0.913466	0.408444	0.573065	0.338263	0.253433	0.308345
10_2335687_S	0.065028	0.539643	0.277312	0.108035	0.752973	0.19144	0.737142	0.125464	0.719777	0.448258	0.305594	0.832694	0.668123	0.407024	0.916986	0.684265	0.00493398	0.800068	0.060339	0.54452	0.253362	0.0480252	0.849774	0.79281	0.312654	0.507871	0.58096	0.192761	0.103213	0.667933	0.770755	0.847623	0.16317	0.563344	0.427772	0.652983	0.367624	0.923557	0.853699	0.205501	0.25838	0.420303	0.408943	0.927354	0.291874	0.0677944	0.700169	0.740335	0.691108
10_2335721_S	7.77166e-05	0.269498	0.000157965	0.0333206	0.664375	0.000622741	0.162467	0.000663903	0.0167595	0.694857	0.0037661	0.975198	0.129172	0.455244	0.789671	0.0942569	0.0816729	0.540231	9.53083e-05	0.260438	0.000311153	0.0317177	0.678792	0.793961	0.000989071	0.369217	0.541128	0.135105	0.00975772	0.00397433	0.525775	0.0258158	0.271971	0.207344	0.0129752	0.546428	0.00913719	0.00514014	0.34526	0.000220277	0.916135	0.780761	0.539325	0.56209	0.385969	0.740658	0.640658	0.106734	0.138836
10_2335770_S	0.185412	0.979224	0.261715	0.574822	0.806134	0.563323	0.912759	0.475593	0.586904	0.42058	0.432042	0.40704	0.282097	0.38481	0.325756	0.468685	0.166315	0.399563	0.258521	0.999486	0.406588	0.476093	0.913096	0.481469	0.435902	0.267257	0.28816	0.935938	0.122312	0.670483	0.925189	0.979779	0.96548	0.960364	0.960595	0.731492	0.978412	0.56132	0.137843	0.404853	0.552018	0.188908	0.287971	0.139007	0.607754	0.189151	0.188035	0.932317	0.893128
10_2335873_S	0.0666601	0.837704	0.0837943	0.270304	0.871021	0.220963	0.965234	0.208437	0.656813	0.793458	0.512387	0.764089	0.20083	0.305811	0.631536	0.366202	0.00572176	0.517389	0.0722638	0.861044	0.12575	0.13287	0.916393	0.454904	0.508514	0.271824	0.495065	0.238924	0.241405	0.30379	0.288612	0.391343	0.575562	0.947366	0.231215	0.432051	0.261756	0.80191	0.751728	0.329287	0.227337	0.312249	0.282026	0.356533	0.604183	0.0409529	0.188475	0.93816	0.760748
10_2335888_S	0.229694	0.575144	0.58768	0.197557	0.753539	0.47494	0.729095	0.341903	0.571895	0.376011	0.19345	0.465951	0.963323	0.431305	0.210668	0.416751	0.0551656	0.437683	0.307782	0.578382	0.768711	0.13764	0.972429	0.52097	0.240399	0.246543	0.764802	0.278193	0.290983	0.977563	0.717947	0.729831	0.117033	0.562928	0.751993	0.416546	0.840705	0.764106	0.0457045	0.460649	0.11204	0.0839969	0.407769	0.0434541	0.684055	0.00761568	0.0405905	0.347763	0.498675
10_2335940_S	0.0530748	0.288573	0.159279	0.350376	0.31886	0.246442	0.789994	0.189148	0.712828	0.902992	0.49359	0.922156	0.956462	0.156808	0.691083	0.272998	0.0207637	0.348522	0.0637588	0.289343	0.199184	0.204789	0.294899	0.407804	0.469478	0.224278	0.241264	0.452782	0.501702	0.383722	0.238762	0.391873	0.426025	0.653667	0.408523	0.638016	0.349721	0.879472	0.701415	0.229641	0.348306	0.633659	0.199508	0.518546	0.452574	0.0493081	0.230061	0.942764	0.930145
10_2336055_S	0.314116	0.185005	0.41364	0.598527	0.303394	0.453089	0.83595	0.412685	0.754608	0.887762	0.761479	0.860183	0.433947	0.262348	0.511741	0.28627	0.0334435	0.24555	0.342079	0.190739	0.513542	0.396821	0.224967	0.263816	0.719639	0.155182	0.414595	0.466593	0.962425	0.772104	0.412788	0.945495	0.498131	0.321576	0.635434	0.715695	0.613612	0.927257	0.522441	0.565816	0.214632	0.585022	0.304776	0.329421	0.263062	0.0383802	0.0988842	0.517264	0.65867
10_2336289_S	0.0665711	0.387461	0.163592	0.279013	0.45637	0.662987	0.502676	0.512468	0.606839	0.483232	0.605123	0.25957	0.317179	0.440355	0.413808	0.750143	0.0615622	0.536839	0.111041	0.404742	0.273164	0.179563	0.466279	0.45661	0.710378	0.31886	0.914221	0.133368	0.463406	0.167654	0.219414	0.136682	0.761769	0.574445	0.644182	0.646591	0.543028	0.798879	0.368364	0.256783	0.193904	0.151337	0.258555	0.266444	0.683836	0.180515	0.226485	0.478533	0.312269
30_2386811_S	0.559703	0.172044	0.731344	0.910504	0.359355	0.534691	0.821218	0.674162	0.37166	0.84963	0.885936	0.382342	0.184627	0.575984	0.957471	0.0482978	0.028636	0.270901	0.547611	0.162827	0.792239	0.618127	0.229878	0.254525	0.893679	0.211041	0.399575	0.0878867	0.983144	0.245144	0.208516	0.202933	0.0231089	0.0826804	0.754529	0.872196	0.666663	0.777108	0.990581	0.442083	0.272326	0.695697	0.355242	0.722492	0.212116	0.117012	0.665721	0.0976599	0.0595325
30_2387242_S	0.977734	0.209516	0.792187	0.620734	0.603257	0.143816	0.0929461	0.264535	0.335	0.83993	0.598566	0.0935752	0.558381	0.657285	0.530746	0.00612594	0.484923	0.0230434	0.949876	0.198955	0.809359	0.688987	0.128049	0.0921965	0.843403	0.0433332	0.75127	0.374476	0.150374	0.189254	0.575232	0.206257	0.652547	0.810432	0.452558	0.285976	0.414961	0.116401	0.963327	0.70414	0.152262	0.530568	0.612125	0.735539	0.14185	0.719246	0.714813	0.591179	0.541705
30_2387258_S	0.964145	0.155888	0.728554	0.710897	0.586995	0.15546	0.12729	0.291448	0.385948	0.777108	0.585483	0.0731923	0.508402	0.974539	0.445282	0.00285919	0.368658	0.0209562	0.97484	0.147412	0.724447	0.80476	0.121441	0.075578	0.884326	0.0353547	0.393477	0.462438	0.207922	0.134351	0.535314	0.125537	0.958365	0.481618	0.481125	0.29818	0.465394	0.172171	0.827875	0.783984	0.115341	0.592678	0.813857	0.965116	0.175873	0.946942	0.527273	0.344309	0.309917
1_2949136_S	0.608202	0.951066	0.942564	0.0471261	0.68056	0.776171	0.884125	0.353272	0.50099	0.807187	0.035173	0.11797	0.719691	0.538007	0.326249	0.089143	0.644558	0.0955315	0.681525	0.958403	0.696113	0.0554027	0.165098	0.0872681	0.087766	0.168677	0.230931	0.00473016	0.136035	0.584472	0.764594	0.954792	0.0810383	0.421116	0.974004	0.979058	0.696723	0.799468	0.932648	0.610904	0.127246	0.950616	0.409	0.642334	0.939396	0.107874	0.74272	0.415638	0.366941
1_2949293_S	0.477006	0.526927	0.109621	0.400174	0.43324	0.321352	0.615569	0.186506	0.304189	0.581567	0.415778	0.960966	0.438956	0.657252	0.576706	0.919344	0.921167	0.625092	0.42456	0.542569	0.0944248	0.453491	0.664234	0.895931	0.301183	0.783454	0.706276	0.197132	0.495962	0.10122	0.349162	0.0361894	0.741836	0.0771296	0.294611	0.809772	0.172434	0.439555	0.204818	0.410982	0.922225	0.0963669	0.930957	0.107625	0.830041	0.978726	0.694165	0.1058	0.0884032
1_2949431_S	0.186532	0.819423	0.285149	0.0938747	0.90449	0.725777	0.817567	0.827498	0.304512	0.82576	0.282597	0.113953	0.41412	0.57826	0.340427	0.0256794	0.87909	0.00714154	0.232852	0.834099	0.463412	0.109634	0.130126	0.0394048	0.613734	0.0249015	0.78368	0.348656	0.0490803	0.151789	0.648638	0.134715	0.25127	0.1263	0.920391	0.361175	0.965815	0.553435	0.547415	0.852955	0.269996	0.63134	0.910612	0.673271	0.569544	0.728409	0.824338	0.189679	0.111771
1_2949447_S	0.460536	0.541656	0.301586	0.356523	0.749614	0.616412	0.830829	0.689353	0.271132	0.625954	0.545788	0.161628	0.867291	0.867935	0.92068	0.226972	0.468383	0.10188	0.438088	0.543701	0.358871	0.298241	0.520713	0.328564	0.899381	0.259105	0.443205	0.157455	0.108053	0.155714	0.848262	0.155779	0.143254	0.0431222	0.746074	0.500486	0.672024	0.264266	0.164189	0.646703	0.134074	0.229771	0.714448	0.190539	0.538197	0.127108	0.32109	0.0691271	0.0632776
1_2950119_S	0.7382	0.702906	0.810789	0.370251	0.722105	0.555881	0.49691	0.293815	0.785308	0.976984	0.14875	0.274794	0.629791	0.618741	0.596335	0.545955	0.442316	0.519482	0.801589	0.707306	0.649485	0.34231	0.780586	0.448782	0.20772	0.685926	0.372268	0.0153098	0.238645	0.745629	0.764606	0.870945	0.769589	0.644463	0.829665	0.536724	0.655527	0.721366	0.729171	0.862991	0.399853	0.744351	0.713758	0.91094	0.428544	0.194291	0.487607	0.708663	0.760505
1_2950189_S	0.949824	0.813999	0.634007	0.125537	0.500681	0.302069	0.281133	0.123974	0.165242	0.547774	0.0397357	0.230706	0.737793	0.765677	0.247879	0.266546	0.790202	0.19483	0.914957	0.812586	0.392635	0.177242	0.655898	0.0947371	0.0432393	0.221644	0.745556	0.0274066	0.406156	0.762484	0.515607	0.407667	0.792721	0.790242	0.466889	0.384054	0.317805	0.552961	0.619083	0.33516	0.766121	0.690773	0.695237	0.345847	0.978908	0.957082	0.639387	0.585696	0.657486
1_2951348_S	0.89381	0.387121	0.547122	0.529855	0.246408	0.452824	0.819209	0.365062	0.38126	0.829754	0.704325	0.658116	0.889761	0.424144	0.59046	0.468155	0.66343	0.200166	0.880512	0.391267	0.620513	0.570277	0.806596	0.436095	0.535105	0.247163	0.661025	0.318753	0.382888	0.520659	0.895191	0.448941	0.881779	0.407755	0.55709	0.941824	0.452177	0.689682	0.85871	0.842398	0.956198	0.933744	0.660889	0.912453	0.529751	0.474365	0.418106	0.634909	0.479827
1_2951866_S	0.815905	0.855984	0.74616	0.0132458	0.38665	0.654151	0.401174	0.560734	0.248704	0.693109	0.144846	0.25014	0.0702264	0.830086	0.366626	0.0621466	0.997637	0.0613216	0.904563	0.896407	0.994497	0.024114	0.087379	0.0616865	0.177421	0.0908018	0.715775	0.250635	0.534629	0.687269	0.799687	0.56313	0.00102488	0.162644	0.592443	0.538266	0.581903	0.680638	0.828065	0.602254	0.11988	0.379334	0.632168	0.720497	0.252175	0.303119	0.847368	0.209662	0.120286
1_2951996_S	0.83424	0.943678	0.618228	0.30364	0.93983	0.480436	0.498078	0.214752	0.746399	0.726161	0.105412	0.234143	0.571956	0.778982	0.430736	0.689264	0.439097	0.305039	0.932628	0.938207	0.449066	0.283815	0.511073	0.274543	0.154147	0.463744	0.738885	0.0124622	0.115168	0.884409	0.736481	0.644765	0.862492	0.951703	0.730208	0.516799	0.512429	0.890269	0.977628	0.5923	0.348748	0.801133	0.748782	0.582417	0.787283	0.304004	0.966271	0.938178	0.956781
1_2952028_S	0.0347789	0.871866	0.171861	0.0815207	0.762527	0.210882	0.0314017	0.426403	0.279311	0.8044	0.206611	0.140337	0.154325	0.675569	0.236827	0.0100682	0.709023	0.00197522	0.048113	0.906146	0.317689	0.103988	0.0540774	0.0201481	0.686172	0.00932133	0.740703	0.388066	0.0264706	0.0526435	0.0655037	0.0479691	0.129168	0.072618	0.221587	0.057715	0.316846	0.229858	0.403167	0.899094	0.320106	0.207983	0.919068	0.623972	0.457718	0.612605	0.832031	0.0751129	0.0372853
1_2952038_S	0.0862288	0.395747	0.208387	0.956625	0.10616	0.752934	0.526985	0.550611	0.422871	0.172062	0.46863	0.205753	0.0685057	0.665631	0.0805558	0.198071	0.410907	0.237959	0.182154	0.369017	0.53376	0.822861	0.65467	0.141328	0.442799	0.15041	0.359022	0.238988	0.228423	0.0196962	0.658263	0.14873	0.843451	0.179823	0.814549	0.826804	0.90028	0.750644	0.857291	0.891038	0.065912	0.425001	0.673653	0.53049	0.709372	0.761301	0.842785	0.207628	0.129699
1_2952101_S	0.29084	0.936499	0.308526	0.777737	0.875592	0.209689	0.345982	0.193793	0.620118	0.915637	0.227007	0.503778	0.697617	0.240748	0.57114	0.186522	0.00922184	0.289501	0.297908	0.921885	0.365309	0.516228	0.818757	0.433387	0.205512	0.169044	0.520197	0.0789479	0.149101	0.76295	0.922916	0.861259	0.288931	0.67252	0.616563	0.677452	0.623877	0.628596	0.557446	0.543172	0.895102	0.450923	0.221335	0.580951	0.233489	0.0180846	0.176334	0.63532	0.758042
11_3994483_S	0.625383	0.328283	0.756898	0.931619	0.0340191	0.445022	0.36802	0.456523	0.198398	0.537197	0.373808	0.27181	0.0927014	0.60128	0.575786	0.850481	0.663427	0.774465	0.555183	0.302022	0.961118	0.953621	0.236887	0.444891	0.295481	0.631829	0.935038	0.352567	0.480374	0.529918	0.271812	0.645732	0.632052	0.617109	0.579402	0.499959	0.648749	0.347616	0.690289	0.827223	0.244321	0.260867	0.348857	0.742488	0.451228	0.755365	0.897682	0.808189	0.834088
11_3994752_S	0.193628	0.00240243	0.269899	0.831486	0.496212	0.319195	0.562434	0.272547	0.251628	0.0238229	0.144556	0.736065	0.0292701	0.634724	0.00706525	0.0818034	0.0315319	0.0105415	0.117768	0.00294602	0.0902366	0.840347	0.0593377	0.00260888	0.141444	0.00327119	0.594442	0.487406	0.324184	0.302604	0.923869	0.306798	0.435241	0.545302	0.624049	0.885315	0.586714	0.905372	0.135511	0.381397	0.902779	0.311068	0.679864	0.0676953	0.109721	0.562366	0.0542822	0.384531	0.587769
11_3995416_S	0.162122	0.00281682	0.235925	0.560157	0.461816	0.282241	0.579548	0.251555	0.303945	0.016471	0.102851	0.755536	0.0213954	0.660224	0.0048005	0.0489628	0.0604134	0.00626228	0.0921097	0.00347367	0.0705184	0.847365	0.0416215	0.0015708	0.113476	0.00216553	0.622562	0.457999	0.173654	0.366088	0.940994	0.400036	0.182267	0.835414	0.656568	0.874918	0.633091	0.668176	0.181591	0.451137	0.922128	0.373031	0.705425	0.103872	0.154241	0.953808	0.108847	0.630581	0.866771
11_3995574_S	0.666377	0.464262	0.440402	0.321118	0.329739	0.224868	0.484829	0.203346	0.151538	0.862541	0.326751	0.3835	0.0097667	0.72216	0.278298	0.0360974	0.376355	0.180336	0.75093	0.430037	0.568901	0.388837	0.881367	0.38774	0.212676	0.138034	0.49733	0.0945288	0.570441	0.531887	0.933006	0.593807	0.056635	0.0991259	0.198508	0.420137	0.155674	0.131201	0.214336	0.211411	0.353496	0.690439	0.55128	0.312971	0.884533	0.241604	0.312657	0.130056	0.157598
11_3995740_S	0.995879	0.0446082	0.865689	0.623999	0.235521	0.0840511	0.182949	0.0738235	0.000274813	0.416285	0.0407693	0.0030606	0.070099	0.0163801	0.288448	0.293951	0.0554516	0.704311	0.984172	0.0415549	0.856677	0.339055	0.19806	0.246743	0.012735	0.705265	0.00103566	0.770744	0.841953	0.023442	0.32157	0.0196697	1.55613e-06	1.08177e-06	0.127759	0.636696	0.100209	7.2188e-06	0.110026	0.00334435	6.50453e-06	0.329455	0.0110364	0.157363	0.0925916	4.12516e-07	0.000471087	4.77143e-06	1.95391e-05
11_3995764_S	0.165935	0.00127999	0.240433	0.693927	0.402705	0.293614	0.618424	0.263308	0.271761	0.0130324	0.109324	0.675606	0.0251566	0.557459	0.00378264	0.0567602	0.0390022	0.00549658	0.092468	0.00159284	0.0699432	0.986201	0.0338584	0.00127509	0.117582	0.00166754	0.510373	0.480706	0.210257	0.347887	0.938531	0.371219	0.300181	0.681118	0.678445	0.827266	0.649892	0.778936	0.152696	0.420666	0.841471	0.373469	0.60181	0.079349	0.126026	0.718942	0.0693099	0.50259	0.733069
11_3996076_S	0.0712665	0.286805	0.035805	0.656364	0.668313	0.95364	0.355999	0.768683	0.132055	0.818922	0.936052	0.296809	0.0902995	0.51697	0.773288	0.582903	0.124786	0.674961	0.109107	0.265281	0.0740318	0.927328	0.917208	0.479781	0.847806	0.46328	0.322176	0.617343	0.0523016	0.220233	0.624064	0.548241	0.546624	0.554268	0.929988	0.493464	0.847481	0.0649764	0.424574	0.800505	0.293157	0.12152	0.510436	0.264681	0.314716	0.0556194	0.13482	0.791963	0.959199
11_3996452_S	0.568893	0.656604	0.531844	0.521342	0.382872	0.291109	0.515684	0.287534	0.271619	0.850608	0.397733	0.608925	0.00407831	0.974522	0.313591	0.103359	0.352656	0.291546	0.6471	0.613022	0.663465	0.609904	0.832171	0.461482	0.293167	0.208919	0.837101	0.140858	0.518627	0.54412	0.998358	0.627721	0.0697097	0.125052	0.207803	0.422893	0.170627	0.196911	0.162185	0.241893	0.469834	0.66407	0.699216	0.249988	0.828756	0.223194	0.256846	0.147662	0.18677
11_3996646_S	0.132732	0.00125124	0.194821	0.669362	0.393379	0.292473	0.63087	0.265009	0.286351	0.0128825	0.115615	0.667399	0.0274589	0.547114	0.0040036	0.061652	0.044316	0.0062015	0.0730047	0.00155148	0.0550177	0.979941	0.0350415	0.00148577	0.123667	0.00192916	0.499145	0.494276	0.189328	0.335213	0.934319	0.35856	0.288531	0.678972	0.682631	0.818416	0.656359	0.754372	0.153928	0.433362	0.83195	0.385346	0.591064	0.0816867	0.135063	0.746501	0.0742561	0.504469	0.728862
11_3997123_S	0.385895	0.0999986	0.127414	0.27682	0.181377	0.413393	0.080837	0.48751	0.00923149	0.684393	0.431919	0.0537422	0.0644284	0.492701	0.755597	0.810774	0.280966	0.906693	0.507747	0.0881072	0.242582	0.479773	0.454947	0.432909	0.218669	0.667601	0.15586	0.88536	0.126082	0.934251	0.504734	0.725671	0.215918	0.383131	0.41058	0.201762	0.389795	0.00750817	0.328062	0.434722	0.0474432	0.0370299	0.708639	0.244953	0.0550309	0.0583047	0.1687	0.324379	0.453453
12_4318608_S	0.717878	0.805131	0.572441	0.964009	0.382907	0.113027	0.794504	0.0463684	0.0645356	0.845097	0.0267842	0.264489	0.812059	0.81484	0.795732	0.159574	0.311651	0.609372	0.67071	0.798911	0.508333	0.983651	0.589093	0.879984	0.0230704	0.512604	0.489349	0.0819908	0.459111	0.907553	0.888776	0.595119	0.654028	0.592607	0.568402	0.898048	0.305724	0.375456	0.828152	0.0822397	0.958586	0.554805	0.971243	0.87332	0.970338	0.366265	0.988914	0.737303	0.786094
12_4319966_S	0.0380495	0.117343	0.0825785	0.292162	0.598933	0.877177	0.283824	0.566066	0.193329	0.555075	0.104554	0.803385	0.48423	0.290282	0.61489	0.997822	0.707234	0.537622	0.055347	0.123786	0.120544	0.389704	0.869478	0.433863	0.176248	0.670761	0.352029	0.237722	0.549884	0.526164	0.591675	0.849425	0.968144	0.548228	0.897095	0.393823	0.79172	0.347984	0.741453	0.254202	0.89662	0.35397	0.351218	0.835003	0.267931	0.636564	0.620327	0.861656	0.970186
12_4320007_S	0.417688	0.837786	0.162015	0.275288	0.668391	0.185106	0.999947	0.085828	0.303075	0.835779	0.0723965	0.568245	0.877289	0.57287	0.829884	0.196422	0.349428	0.953114	0.385629	0.835005	0.143071	0.26477	0.933348	0.701846	0.0769337	0.828894	0.479177	0.0751664	0.367652	0.61845	0.806352	0.284721	0.741075	0.235626	0.455867	0.97789	0.216527	0.359738	0.75504	0.0584127	0.916551	0.847861	0.716987	0.42615	0.668893	0.72113	0.469901	0.357675	0.43267
[truncated: 12 more columns]

## Sheet: reorder by SNP name
	p1	p2	p3	p4	p5	p6	p7	p8	p9	p10	p11	p12	p13	p14	p15	p16	p17	p18	p19	p20	p21	p22	p23	p24	p25	p26	p27	p28	p29	p30	p31	p32	p33	p34	p35	p36	p37	p38	p39	p40	p41	p42	p43	p44	p45	p46	p47	p48	p49
1_2949136_S	0.608202	0.951066	0.942564	0.0471261	0.68056	0.776171	0.884125	0.353272	0.50099	0.807187	0.035173	0.11797	0.719691	0.538007	0.326249	0.089143	0.644558	0.0955315	0.681525	0.958403	0.696113	0.0554027	0.165098	0.0872681	0.087766	0.168677	0.230931	0.00473016	0.136035	0.584472	0.764594	0.954792	0.0810383	0.421116	0.974004	0.979058	0.696723	0.799468	0.932648	0.610904	0.127246	0.950616	0.409	0.642334	0.939396	0.107874	0.74272	0.415638	0.366941
1_2949293_S	0.477006	0.526927	0.109621	0.400174	0.43324	0.321352	0.615569	0.186506	0.304189	0.581567	0.415778	0.960966	0.438956	0.657252	0.576706	0.919344	0.921167	0.625092	0.42456	0.542569	0.0944248	0.453491	0.664234	0.895931	0.301183	0.783454	0.706276	0.197132	0.495962	0.10122	0.349162	0.0361894	0.741836	0.0771296	0.294611	0.809772	0.172434	0.439555	0.204818	0.410982	0.922225	0.0963669	0.930957	0.107625	0.830041	0.978726	0.694165	0.1058	0.0884032
1_2949431_S	0.186532	0.819423	0.285149	0.0938747	0.90449	0.725777	0.817567	0.827498	0.304512	0.82576	0.282597	0.113953	0.41412	0.57826	0.340427	0.0256794	0.87909	0.00714154	0.232852	0.834099	0.463412	0.109634	0.130126	0.0394048	0.613734	0.0249015	0.78368	0.348656	0.0490803	0.151789	0.648638	0.134715	0.25127	0.1263	0.920391	0.361175	0.965815	0.553435	0.547415	0.852955	0.269996	0.63134	0.910612	0.673271	0.569544	0.728409	0.824338	0.189679	0.111771
1_2949447_S	0.460536	0.541656	0.301586	0.356523	0.749614	0.616412	0.830829	0.689353	0.271132	0.625954	0.545788	0.161628	0.867291	0.867935	0.92068	0.226972	0.468383	0.10188	0.438088	0.543701	0.358871	0.298241	0.520713	0.328564	0.899381	0.259105	0.443205	0.157455	0.108053	0.155714	0.848262	0.155779	0.143254	0.0431222	0.746074	0.500486	0.672024	0.264266	0.164189	0.646703	0.134074	0.229771	0.714448	0.190539	0.538197	0.127108	0.32109	0.0691271	0.0632776
1_2950119_S	0.7382	0.702906	0.810789	0.370251	0.722105	0.555881	0.49691	0.293815	0.785308	0.976984	0.14875	0.274794	0.629791	0.618741	0.596335	0.545955	0.442316	0.519482	0.801589	0.707306	0.649485	0.34231	0.780586	0.448782	0.20772	0.685926	0.372268	0.0153098	0.238645	0.745629	0.764606	0.870945	0.769589	0.644463	0.829665	0.536724	0.655527	0.721366	0.729171	0.862991	0.399853	0.744351	0.713758	0.91094	0.428544	0.194291	0.487607	0.708663	0.760505
1_2950189_S	0.949824	0.813999	0.634007	0.125537	0.500681	0.302069	0.281133	0.123974	0.165242	0.547774	0.0397357	0.230706	0.737793	0.765677	0.247879	0.266546	0.790202	0.19483	0.914957	0.812586	0.392635	0.177242	0.655898	0.0947371	0.0432393	0.221644	0.745556	0.0274066	0.406156	0.762484	0.515607	0.407667	0.792721	0.790242	0.466889	0.384054	0.317805	0.552961	0.619083	0.33516	0.766121	0.690773	0.695237	0.345847	0.978908	0.957082	0.639387	0.585696	0.657486
1_2951348_S	0.89381	0.387121	0.547122	0.529855	0.246408	0.452824	0.819209	0.365062	0.38126	0.829754	0.704325	0.658116	0.889761	0.424144	0.59046	0.468155	0.66343	0.200166	0.880512	0.391267	0.620513	0.570277	0.806596	0.436095	0.535105	0.247163	0.661025	0.318753	0.382888	0.520659	0.895191	0.448941	0.881779	0.407755	0.55709	0.941824	0.452177	0.689682	0.85871	0.842398	0.956198	0.933744	0.660889	0.912453	0.529751	0.474365	0.418106	0.634909	0.479827
1_2951866_S	0.815905	0.855984	0.74616	0.0132458	0.38665	0.654151	0.401174	0.560734	0.248704	0.693109	0.144846	0.25014	0.0702264	0.830086	0.366626	0.0621466	0.997637	0.0613216	0.904563	0.896407	0.994497	0.024114	0.087379	0.0616865	0.177421	0.0908018	0.715775	0.250635	0.534629	0.687269	0.799687	0.56313	0.00102488	0.162644	0.592443	0.538266	0.581903	0.680638	0.828065	0.602254	0.11988	0.379334	0.632168	0.720497	0.252175	0.303119	0.847368	0.209662	0.120286
1_2951996_S	0.83424	0.943678	0.618228	0.30364	0.93983	0.480436	0.498078	0.214752	0.746399	0.726161	0.105412	0.234143	0.571956	0.778982	0.430736	0.689264	0.439097	0.305039	0.932628	0.938207	0.449066	0.283815	0.511073	0.274543	0.154147	0.463744	0.738885	0.0124622	0.115168	0.884409	0.736481	0.644765	0.862492	0.951703	0.730208	0.516799	0.512429	0.890269	0.977628	0.5923	0.348748	0.801133	0.748782	0.582417	0.787283	0.304004	0.966271	0.938178	0.956781
1_2952028_S	0.0347789	0.871866	0.171861	0.0815207	0.762527	0.210882	0.0314017	0.426403	0.279311	0.8044	0.206611	0.140337	0.154325	0.675569	0.236827	0.0100682	0.709023	0.00197522	0.048113	0.906146	0.317689	0.103988	0.0540774	0.0201481	0.686172	0.00932133	0.740703	0.388066	0.0264706	0.0526435	0.0655037	0.0479691	0.129168	0.072618	0.221587	0.057715	0.316846	0.229858	0.403167	0.899094	0.320106	0.207983	0.919068	0.623972	0.457718	0.612605	0.832031	0.0751129	0.0372853
1_2952038_S	0.0862288	0.395747	0.208387	0.956625	0.10616	0.752934	0.526985	0.550611	0.422871	0.172062	0.46863	0.205753	0.0685057	0.665631	0.0805558	0.198071	0.410907	0.237959	0.182154	0.369017	0.53376	0.822861	0.65467	0.141328	0.442799	0.15041	0.359022	0.238988	0.228423	0.0196962	0.658263	0.14873	0.843451	0.179823	0.814549	0.826804	0.90028	0.750644	0.857291	0.891038	0.065912	0.425001	0.673653	0.53049	0.709372	0.761301	0.842785	0.207628	0.129699
1_2952101_S	0.29084	0.936499	0.308526	0.777737	0.875592	0.209689	0.345982	0.193793	0.620118	0.915637	0.227007	0.503778	0.697617	0.240748	0.57114	0.186522	0.00922184	0.289501	0.297908	0.921885	0.365309	0.516228	0.818757	0.433387	0.205512	0.169044	0.520197	0.0789479	0.149101	0.76295	0.922916	0.861259	0.288931	0.67252	0.616563	0.677452	0.623877	0.628596	0.557446	0.543172	0.895102	0.450923	0.221335	0.580951	0.233489	0.0180846	0.176334	0.63532	0.758042
10_2334801_S	0.0178372	0.819417	0.0862825	0.782964	0.396687	0.969917	0.686752	0.819499	0.940915	0.679771	0.781169	0.122771	0.5621	0.643193	0.716648	0.353241	0.444866	0.485219	0.0277389	0.833381	0.168771	0.887564	0.334488	0.528055	0.856018	0.494252	0.286007	0.827267	0.558643	0.139456	0.128953	0.153123	0.265066	0.431841	0.758303	0.575563	0.917522	0.771043	0.432432	0.953801	0.108039	0.465803	0.522445	0.716734	0.426166	0.781927	0.8216	0.233086	0.1847
10_2334901_S	0.347175	0.838174	0.119995	0.319761	0.743838	0.667508	0.552716	0.541623	0.588802	0.740435	0.668604	0.171581	0.0530222	0.733803	0.60954	0.835697	0.0424928	0.742774	0.402048	0.878895	0.193008	0.198103	0.89285	0.5615	0.760991	0.43666	0.730716	0.229799	0.235482	0.338473	0.529207	0.324568	0.798454	0.509223	0.637161	0.666291	0.529156	0.731184	0.458847	0.274454	0.122712	0.160979	0.494764	0.344484	0.883038	0.144492	0.274955	0.579139	0.418974
10_2334953_S	0.0135351	0.797786	0.0634083	0.748569	0.43395	0.907664	0.602497	0.883928	0.875503	0.759209	0.778093	0.129115	0.622092	0.678252	0.614436	0.288022	0.352811	0.387249	0.0225039	0.810934	0.140696	0.871317	0.318229	0.434057	0.88445	0.383068	0.309258	0.933605	0.607751	0.136167	0.120772	0.147652	0.251645	0.423722	0.748361	0.554291	0.904386	0.722505	0.474162	0.944381	0.11402	0.500275	0.553225	0.782222	0.349816	0.858378	0.919872	0.234671	0.177477
10_2335092_S	0.0678043	0.308195	0.0936077	0.00653233	0.0616652	0.0915914	0.359431	0.091315	0.538204	0.078159	0.129977	0.894081	0.749931	0.212716	0.518699	0.463613	0.196576	0.583458	0.0421174	0.309105	0.0720643	0.00645814	0.0800079	0.4298	0.109556	0.725082	0.3498	0.758302	0.00325526	0.454477	0.696844	0.798974	0.0624852	0.540159	0.451239	0.558535	0.465257	0.482177	0.227726	0.129858	0.912337	0.905328	0.201456	0.367705	0.162705	0.950985	0.168493	0.681977	0.93981
10_2335191_S	0.303818	0.927634	0.12808	0.298327	0.831273	0.503624	0.576087	0.361768	0.703385	0.912509	0.380651	0.258603	0.14782	0.344588	0.982751	0.830767	0.151828	0.971192	0.317067	0.896215	0.155161	0.22012	0.764912	0.986802	0.482775	0.781902	0.811089	0.295612	0.153664	0.182847	0.326976	0.188895	0.6122	0.466159	0.415012	0.756042	0.332171	0.566694	0.844436	0.132901	0.192171	0.344789	0.204213	0.640486	0.769202	0.363054	0.591231	0.354069	0.278961
10_2335303_S	0.379474	0.376449	0.254748	0.00746441	0.103295	0.0629988	0.202606	0.0380347	0.258418	0.43936	0.0386439	0.985131	0.439515	0.286118	0.447664	0.965545	0.622251	0.327925	0.292957	0.37378	0.157795	0.0115233	0.0581931	0.181512	0.0320062	0.444837	0.398633	0.862915	0.00430505	0.371006	0.790177	0.511232	0.243565	0.197134	0.22086	0.317983	0.19593	0.177039	0.433729	0.041869	0.927016	0.804587	0.253275	0.318555	0.0645174	0.600076	0.0918362	0.316385	0.523693
10_2335305_S	0.0342345	0.646633	0.0349915	0.934628	0.692478	0.982053	0.770918	0.816687	0.647785	0.385278	0.44499	0.137588	0.560906	0.218214	0.898518	0.200047	0.240813	0.630197	0.0414612	0.660202	0.066689	0.895175	0.522622	0.533357	0.544943	0.604459	0.0970923	0.714975	0.239548	0.131955	0.163463	0.127198	0.30175	0.29834	0.779553	0.627579	0.914981	0.905907	0.306289	0.985018	0.122009	0.443943	0.186442	0.469681	0.487644	0.757949	0.528614	0.172793	0.150324
10_2335527_S	0.679709	0.434915	0.573133	0.00354099	0.372903	0.0468267	0.65198	0.0175007	0.486931	0.887717	0.0278213	0.223855	0.0278939	0.180079	0.967255	0.570711	0.0360143	0.932464	0.5787	0.462495	0.458286	0.00246446	0.331887	0.775638	0.0324954	0.680995	0.608582	0.322131	0.0505583	0.997738	0.339223	0.723241	0.0231184	0.826778	0.372599	0.99872	0.261052	0.419457	0.586556	0.0380927	0.0305661	0.102104	0.203539	0.665552	0.188694	0.080126	0.745253	0.579191	0.479046
10_2335548_S	0.416308	0.92501	0.556173	0.469654	0.746235	0.685383	0.993845	0.618699	0.408087	0.340417	0.550801	0.614005	0.962191	0.20458	0.917538	0.316098	0.470921	0.808812	0.370886	0.924033	0.552364	0.454383	0.856046	0.968327	0.512251	0.790086	0.213903	0.527599	0.815139	0.635042	0.576501	0.466931	0.166558	0.349375	0.588731	0.645351	0.618999	0.985853	0.924027	0.99878	0.87867	0.936735	0.344432	0.805881	0.912866	0.473677	0.7773	0.34775	0.313719
10_2335586_S	0.339506	0.450388	0.350631	0.00486822	0.557382	0.0263149	0.278098	0.00902883	0.561186	0.884634	0.0460005	0.150043	0.180569	0.256505	0.999783	0.350592	0.0210779	0.959107	0.289556	0.463645	0.266635	0.00284638	0.511644	0.861646	0.0352222	0.595621	0.800046	0.37849	0.0403434	0.735733	0.798703	0.960383	0.0403855	0.991413	0.162216	0.356633	0.105643	0.269985	0.765499	0.0242898	0.022661	0.242549	0.221438	0.86079	0.34515	0.0932131	0.856906	0.835042	0.708885
10_2335663_S	0.195979	0.113257	0.154431	0.065879	0.0344957	0.254953	0.975632	0.200887	0.432422	0.985546	0.147102	0.987648	0.175605	0.491389	0.902847	0.73295	0.92981	0.422147	0.209132	0.106371	0.17618	0.090169	0.0409977	0.367108	0.156557	0.598535	0.586967	0.573371	0.00726549	0.298122	0.50073	0.473172	0.649296	0.0787327	0.661473	0.664127	0.613501	0.387004	0.894094	0.107039	0.765812	0.276142	0.223851	0.913466	0.408444	0.573065	0.338263	0.253433	0.308345
10_2335687_S	0.065028	0.539643	0.277312	0.108035	0.752973	0.19144	0.737142	0.125464	0.719777	0.448258	0.305594	0.832694	0.668123	0.407024	0.916986	0.684265	0.00493398	0.800068	0.060339	0.54452	0.253362	0.0480252	0.849774	0.79281	0.312654	0.507871	0.58096	0.192761	0.103213	0.667933	0.770755	0.847623	0.16317	0.563344	0.427772	0.652983	0.367624	0.923557	0.853699	0.205501	0.25838	0.420303	0.408943	0.927354	0.291874	0.0677944	0.700169	0.740335	0.691108
10_2335721_S	7.77166e-05	0.269498	0.000157965	0.0333206	0.664375	0.000622741	0.162467	0.000663903	0.0167595	0.694857	0.0037661	0.975198	0.129172	0.455244	0.789671	0.0942569	0.0816729	0.540231	9.53083e-05	0.260438	0.000311153	0.0317177	0.678792	0.793961	0.000989071	0.369217	0.541128	0.135105	0.00975772	0.00397433	0.525775	0.0258158	0.271971	0.207344	0.0129752	0.546428	0.00913719	0.00514014	0.34526	0.000220277	0.916135	0.780761	0.539325	0.56209	0.385969	0.740658	0.640658	0.106734	0.138836
10_2335770_S	0.185412	0.979224	0.261715	0.574822	0.806134	0.563323	0.912759	0.475593	0.586904	0.42058	0.432042	0.40704	0.282097	0.38481	0.325756	0.468685	0.166315	0.399563	0.258521	0.999486	0.406588	0.476093	0.913096	0.481469	0.435902	0.267257	0.28816	0.935938	0.122312	0.670483	0.925189	0.979779	0.96548	0.960364	0.960595	0.731492	0.978412	0.56132	0.137843	0.404853	0.552018	0.188908	0.287971	0.139007	0.607754	0.189151	0.188035	0.932317	0.893128
10_2335873_S	0.0666601	0.837704	0.0837943	0.270304	0.871021	0.220963	0.965234	0.208437	0.656813	0.793458	0.512387	0.764089	0.20083	0.305811	0.631536	0.366202	0.00572176	0.517389	0.0722638	0.861044	0.12575	0.13287	0.916393	0.454904	0.508514	0.271824	0.495065	0.238924	0.241405	0.30379	0.288612	0.391343	0.575562	0.947366	0.231215	0.432051	0.261756	0.80191	0.751728	0.329287	0.227337	0.312249	0.282026	0.356533	0.604183	0.0409529	0.188475	0.93816	0.760748
10_2335888_S	0.229694	0.575144	0.58768	0.197557	0.753539	0.47494	0.729095	0.341903	0.571895	0.376011	0.19345	0.465951	0.963323	0.431305	0.210668	0.416751	0.0551656	0.437683	0.307782	0.578382	0.768711	0.13764	0.972429	0.52097	0.240399	0.246543	0.764802	0.278193	0.290983	0.977563	0.717947	0.729831	0.117033	0.562928	0.751993	0.416546	0.840705	0.764106	0.0457045	0.460649	0.11204	0.0839969	0.407769	0.0434541	0.684055	0.00761568	0.0405905	0.347763	0.498675
10_2335940_S	0.0530748	0.288573	0.159279	0.350376	0.31886	0.246442	0.789994	0.189148	0.712828	0.902992	0.49359	0.922156	0.956462	0.156808	0.691083	0.272998	0.0207637	0.348522	0.0637588	0.289343	0.199184	0.204789	0.294899	0.407804	0.469478	0.224278	0.241264	0.452782	0.501702	0.383722	0.238762	0.391873	0.426025	0.653667	0.408523	0.638016	0.349721	0.879472	0.701415	0.229641	0.348306	0.633659	0.199508	0.518546	0.452574	0.0493081	0.230061	0.942764	0.930145
10_2336055_S	0.314116	0.185005	0.41364	0.598527	0.303394	0.453089	0.83595	0.412685	0.754608	0.887762	0.761479	0.860183	0.433947	0.262348	0.511741	0.28627	0.0334435	0.24555	0.342079	0.190739	0.513542	0.396821	0.224967	0.263816	0.719639	0.155182	0.414595	0.466593	0.962425	0.772104	0.412788	0.945495	0.498131	0.321576	0.635434	0.715695	0.613612	0.927257	0.522441	0.565816	0.214632	0.585022	0.304776	0.329421	0.263062	0.0383802	0.0988842	0.517264	0.65867
10_2336289_S	0.0665711	0.387461	0.163592	0.279013	0.45637	0.662987	0.502676	0.512468	0.606839	0.483232	0.605123	0.25957	0.317179	0.440355	0.413808	0.750143	0.0615622	0.536839	0.111041	0.404742	0.273164	0.179563	0.466279	0.45661	0.710378	0.31886	0.914221	0.133368	0.463406	0.167654	0.219414	0.136682	0.761769	0.574445	0.644182	0.646591	0.543028	0.798879	0.368364	0.256783	0.193904	0.151337	0.258555	0.266444	0.683836	0.180515	0.226485	0.478533	0.312269
11_3994483_S	0.625383	0.328283	0.756898	0.931619	0.0340191	0.445022	0.36802	0.456523	0.198398	0.537197	0.373808	0.27181	0.0927014	0.60128	0.575786	0.850481	0.663427	0.774465	0.555183	0.302022	0.961118	0.953621	0.236887	0.444891	0.295481	0.631829	0.935038	0.352567	0.480374	0.529918	0.271812	0.645732	0.632052	0.617109	0.579402	0.499959	0.648749	0.347616	0.690289	0.827223	0.244321	0.260867	0.348857	0.742488	0.451228	0.755365	0.897682	0.808189	0.834088
11_3994752_S	0.193628	0.00240243	0.269899	0.831486	0.496212	0.319195	0.562434	0.272547	0.251628	0.0238229	0.144556	0.736065	0.0292701	0.634724	0.00706525	0.0818034	0.0315319	0.0105415	0.117768	0.00294602	0.0902366	0.840347	0.0593377	0.00260888	0.141444	0.00327119	0.594442	0.487406	0.324184	0.302604	0.923869	0.306798	0.435241	0.545302	0.624049	0.885315	0.586714	0.905372	0.135511	0.381397	0.902779	0.311068	0.679864	0.0676953	0.109721	0.562366	0.0542822	0.384531	0.587769
11_3995416_S	0.162122	0.00281682	0.235925	0.560157	0.461816	0.282241	0.579548	0.251555	0.303945	0.016471	0.102851	0.755536	0.0213954	0.660224	0.0048005	0.0489628	0.0604134	0.00626228	0.0921097	0.00347367	0.0705184	0.847365	0.0416215	0.0015708	0.113476	0.00216553	0.622562	0.457999	0.173654	0.366088	0.940994	0.400036	0.182267	0.835414	0.656568	0.874918	0.633091	0.668176	0.181591	0.451137	0.922128	0.373031	0.705425	0.103872	0.154241	0.953808	0.108847	0.630581	0.866771
11_3995574_S	0.666377	0.464262	0.440402	0.321118	0.329739	0.224868	0.484829	0.203346	0.151538	0.862541	0.326751	0.3835	0.0097667	0.72216	0.278298	0.0360974	0.376355	0.180336	0.75093	0.430037	0.568901	0.388837	0.881367	0.38774	0.212676	0.138034	0.49733	0.0945288	0.570441	0.531887	0.933006	0.593807	0.056635	0.0991259	0.198508	0.420137	0.155674	0.131201	0.214336	0.211411	0.353496	0.690439	0.55128	0.312971	0.884533	0.241604	0.312657	0.130056	0.157598
11_3995740_S	0.995879	0.0446082	0.865689	0.623999	0.235521	0.0840511	0.182949	0.0738235	0.000274813	0.416285	0.0407693	0.0030606	0.070099	0.0163801	0.288448	0.293951	0.0554516	0.704311	0.984172	0.0415549	0.856677	0.339055	0.19806	0.246743	0.012735	0.705265	0.00103566	0.770744	0.841953	0.023442	0.32157	0.0196697	1.55613e-06	1.08177e-06	0.127759	0.636696	0.100209	7.2188e-06	0.110026	0.00334435	6.50453e-06	0.329455	0.0110364	0.157363	0.0925916	4.12516e-07	0.000471087	4.77143e-06	1.95391e-05
11_3995764_S	0.165935	0.00127999	0.240433	0.693927	0.402705	0.293614	0.618424	0.263308	0.271761	0.0130324	0.109324	0.675606	0.0251566	0.557459	0.00378264	0.0567602	0.0390022	0.00549658	0.092468	0.00159284	0.0699432	0.986201	0.0338584	0.00127509	0.117582	0.00166754	0.510373	0.480706	0.210257	0.347887	0.938531	0.371219	0.300181	0.681118	0.678445	0.827266	0.649892	0.778936	0.152696	0.420666	0.841471	0.373469	0.60181	0.079349	0.126026	0.718942	0.0693099	0.50259	0.733069
11_3996076_S	0.0712665	0.286805	0.035805	0.656364	0.668313	0.95364	0.355999	0.768683	0.132055	0.818922	0.936052	0.296809	0.0902995	0.51697	0.773288	0.582903	0.124786	0.674961	0.109107	0.265281	0.0740318	0.927328	0.917208	0.479781	0.847806	0.46328	0.322176	0.617343	0.0523016	0.220233	0.624064	0.548241	0.546624	0.554268	0.929988	0.493464	0.847481	0.0649764	0.424574	0.800505	0.293157	0.12152	0.510436	0.264681	0.314716	0.0556194	0.13482	0.791963	0.959199
11_3996452_S	0.568893	0.656604	0.531844	0.521342	0.382872	0.291109	0.515684	0.287534	0.271619	0.850608	0.397733	0.608925	0.00407831	0.974522	0.313591	0.103359	0.352656	0.291546	0.6471	0.613022	0.663465	0.609904	0.832171	0.461482	0.293167	0.208919	0.837101	0.140858	0.518627	0.54412	0.998358	0.627721	0.0697097	0.125052	0.207803	0.422893	0.170627	0.196911	0.162185	0.241893	0.469834	0.66407	0.699216	0.249988	0.828756	0.223194	0.256846	0.147662	0.18677
11_3996646_S	0.132732	0.00125124	0.194821	0.669362	0.393379	0.292473	0.63087	0.265009	0.286351	0.0128825	0.115615	0.667399	0.0274589	0.547114	0.0040036	0.061652	0.044316	0.0062015	0.0730047	0.00155148	0.0550177	0.979941	0.0350415	0.00148577	0.123667	0.00192916	0.499145	0.494276	0.189328	0.335213	0.934319	0.35856	0.288531	0.678972	0.682631	0.818416	0.656359	0.754372	0.153928	0.433362	0.83195	0.385346	0.591064	0.0816867	0.135063	0.746501	0.0742561	0.504469	0.728862
11_3997123_S	0.385895	0.0999986	0.127414	0.27682	0.181377	0.413393	0.080837	0.48751	0.00923149	0.684393	0.431919	0.0537422	0.0644284	0.492701	0.755597	0.810774	0.280966	0.906693	0.507747	0.0881072	0.242582	0.479773	0.454947	0.432909	0.218669	0.667601	0.15586	0.88536	0.126082	0.934251	0.504734	0.725671	0.215918	0.383131	0.41058	0.201762	0.389795	0.00750817	0.328062	0.434722	0.0474432	0.0370299	0.708639	0.244953	0.0550309	0.0583047	0.1687	0.324379	0.453453
112_321732_S	0.648021	0.176864	0.390726	0.0623808	0.239577	0.117576	0.24545	0.0699334	0.173274	0.0336945	0.107415	0.206418	0.330594	0.231061	0.0450184	0.865864	0.692001	0.895543	0.997779	0.166291	0.157917	0.0818418	0.601144	0.37303	0.0719102	0.68335	0.125699	0.915574	0.849609	0.260583	0.659689	0.30835	0.000988145	0.00887181	0.70645	0.520971	0.615423	0.843338	0.809569	0.687488	0.016968	0.838111	0.0597856	0.983644	0.593275	0.0115209	0.184931	0.023538	0.0172708
112_323489_S	0.873607	0.66575	0.4462	0.430939	0.75074	0.46841	0.0655024	0.57707	0.830554	0.288369	0.126122	0.765128	0.0995249	0.917181	0.157359	0.0519096	0.587495	0.0417418	0.958643	0.68209	0.68661	0.519986	0.340627	0.0442095	0.394602	0.0432939	0.827235	0.191142	0.319881	0.631422	0.172667	0.683089	0.273345	0.794733	0.319443	0.0552641	0.432847	0.552327	0.849364	0.467177	0.74592	0.905245	0.610452	0.757442	0.517964	0.71639	0.525354	0.656323	0.515887
112_323745_S	0.948447	0.274501	0.227881	0.490185	0.80069	0.278589	0.303744	0.268382	0.256294	0.734517	0.679589	0.533115	0.946848	0.198282	0.972306	0.239171	0.671909	0.109115	0.94013	0.271355	0.242034	0.512013	0.37759	0.365708	0.430698	0.18187	0.18968	0.856989	0.649152	0.54535	0.975809	0.548549	0.0415887	0.0184512	0.744428	0.510449	0.749548	0.84484	0.566333	0.589763	0.303524	0.697713	0.0716092	0.427339	0.0232097	0.0568252	0.0278012	0.0531007	0.0786912
12_4318608_S	0.717878	0.805131	0.572441	0.964009	0.382907	0.113027	0.794504	0.0463684	0.0645356	0.845097	0.0267842	0.264489	0.812059	0.81484	0.795732	0.159574	0.311651	0.609372	0.67071	0.798911	0.508333	0.983651	0.589093	0.879984	0.0230704	0.512604	0.489349	0.0819908	0.459111	0.907553	0.888776	0.595119	0.654028	0.592607	0.568402	0.898048	0.305724	0.375456	0.828152	0.0822397	0.958586	0.554805	0.971243	0.87332	0.970338	0.366265	0.988914	0.737303	0.786094
12_4319966_S	0.0380495	0.117343	0.0825785	0.292162	0.598933	0.877177	0.283824	0.566066	0.193329	0.555075	0.104554	0.803385	0.48423	0.290282	0.61489	0.997822	0.707234	0.537622	0.055347	0.123786	0.120544	0.389704	0.869478	0.433863	0.176248	0.670761	0.352029	0.237722	0.549884	0.526164	0.591675	0.849425	0.968144	0.548228	0.897095	0.393823	0.79172	0.347984	0.741453	0.254202	0.89662	0.35397	0.351218	0.835003	0.267931	0.636564	0.620327	0.861656	0.970186
12_4320007_S	0.417688	0.837786	0.162015	0.275288	0.668391	0.185106	0.999947	0.085828	0.303075	0.835779	0.0723965	0.568245	0.877289	0.57287	0.829884	0.196422	0.349428	0.953114	0.385629	0.835005	0.143071	0.26477	0.933348	0.701846	0.0769337	0.828894	0.479177	0.0751664	0.367652	0.61845	0.806352	0.284721	0.741075	0.235626	0.455867	0.97789	0.216527	0.359738	0.75504	0.0584127	0.916551	0.847861	0.716987	0.42615	0.668893	0.72113	0.469901	0.357675	0.43267
168_494768_SD	0.793188	0.485486	0.877909	0.0123411	0.997289	0.279282	0.685465	0.169964	0.457047	0.550494	0.324118	0.254622	0.999348	0.23232	0.30451	0.513194	0.860766	0.205577	0.951862	0.482478	0.599438	0.0227374	0.455238	0.176667	0.263221	0.241345	0.684081	0.512782	0.372132	0.896513	0.539822	0.711528	0.119837	0.666692	0.364069	0.881993	0.251219	0.165794	0.399698	0.082038	0.347696	0.808491	0.176507	0.286869	0.163988	0.719381	0.152709	0.768261	0.923814
168_495863_S	0.374237	0.56498	0.869213	0.350959	0.0827718	0.703255	0.397678	0.344394	0.0528449	0.391052	0.00764861	0.33648	0.0278219	0.564315	0.0780046	0.317428	0.358486	0.118131	0.513383	0.525067	0.711659	0.531677	0.942738	0.0258319	0.0195669	0.0852033	0.978565	0.311367	0.359538	0.167249	0.501391	0.186126	0.00482328	0.0183378	0.832629	0.454695	0.600803	0.835795	0.968932	0.361461	0.131237	0.405389	0.917705	0.432872	0.784887	0.312577	0.709663	0.0651044	0.0214488
168_496247_S	0.505459	0.286072	0.86003	0.205851	0.112976	0.646719	0.384207	0.957552	0.669238	0.164332	0.357987	0.721765	0.19641	0.117104	0.0262517	0.891074	0.751572	0.08383	0.656094	0.276355	0.719398	0.208108	0.870975	0.118595	0.643449	0.101135	0.276226	0.503699	0.13098	0.267634	0.187396	0.370939	0.0167271	0.260795	0.786678	0.521693	0.846993	0.880222	0.526988	0.166537	0.392961	0.719221	0.363956	0.135942	0.483781	0.613207	0.119764	0.320896	0.119125
168_496274_S	0.725273	0.360933	0.92983	0.098398	0.9163	0.0995165	0.128298	0.0896606	0.180851	0.763689	0.618523	0.515545	0.804479	0.511225	0.617925	0.444345	0.969587	0.737605	0.684582	0.35695	0.875799	0.143957	0.979672	0.987756	0.290432	0.721905	0.427631	0.627482	0.795299	0.379244	0.710006	0.33108	0.913311	0.224503	0.233472	0.363682	0.222689	0.0844306	0.562053	0.302918	0.445658	0.871593	0.40211	0.714649	0.825504	0.425427	0.527321	0.30969	0.349489
168_496343_S	0.824662	0.0926607	0.907856	0.00426003	0.391044	0.395522	0.455128	0.275888	0.46676	0.56725	0.457193	0.725378	0.616404	0.161045	0.316936	0.806483	0.933855	0.25263	0.957641	0.0891335	0.797233	0.00811581	0.964355	0.24653	0.367338	0.304541	0.337268	0.537558	0.554921	0.98626	0.527737	0.830056	0.0564018	0.865208	0.480026	0.707695	0.350328	0.20525	0.43316	0.187124	0.903204	0.782108	0.265225	0.276793	0.593736	0.807283	0.179738	0.96837	0.730188
203_203755_S	0.0435478	0.684659	0.135904	0.713732	0.0945178	0.0113078	0.0620582	0.0112582	0.0745035	0.313695	0.0503949	0.813984	0.289779	0.124612	0.736544	0.494744	0.724357	0.269322	0.0300973	0.653381	0.0954743	0.75962	0.164448	0.937117	0.0189277	0.431589	0.263167	0.398963	0.65872	0.0462979	0.0829009	0.0404472	0.511636	0.273079	0.0171601	0.118295	0.0125996	0.0421817	0.0972711	0.0238881	0.945658	0.101514	0.224775	0.248963	0.434353	0.880522	0.901413	0.109139	0.106124
203_203807_S	0.760503	0.904431	0.741106	0.995823	0.685889	0.922984	0.400518	0.98492	0.368643	0.987402	0.675397	0.692187	0.680676	0.209145	0.383352	0.622546	0.52432	0.493821	0.786917	0.903511	0.623752	0.880107	0.989598	0.558099	0.935375	0.468602	0.371129	0.151756	0.59364	0.742005	0.768037	0.395485	0.285394	0.0381712	0.702837	0.407998	0.890584	0.728272	0.517936	0.212133	0.8208	0.685875	0.127173	0.622446	0.254017	0.4798	0.33596	0.142207	0.153703
203_204329_S	0.0951746	0.985088	0.1375	0.683065	0.53855	0.457434	0.339084	0.652958	0.639415	0.636883	0.70847	0.953782	0.519209	0.215632	0.624702	0.88255	0.397463	0.886691	0.102568	0.995224	0.146589	0.621954	0.5821	0.877998	0.987476	0.871119	0.311654	0.450981	0.935974	0.831517	0.800329	0.761895	0.0692746	0.0335099	0.543898	0.372687	0.726754	0.893361	0.55207	0.28523	0.33062	0.709752	0.107839	0.397377	0.120736	0.0650086	0.09214	0.136777	0.183774
203_205101_S	2.56327e-06	0.724028	0.000126701	0.105244	0.546392	0.259019	0.0423535	0.515825	0.20592	0.150114	0.324523	0.589816	0.0292668	0.116791	0.374284	0.487251	0.0966353	0.635636	5.59858e-06	0.778229	0.000319523	0.063981	0.42705	0.596078	0.57229	0.682385	0.134116	0.613176	0.145003	0.0185159	0.0256276	0.0726389	0.175471	0.698749	0.136838	0.0249227	0.302776	0.388361	0.348173	0.50244	0.62397	0.115679	0.118735	0.442682	0.487652	0.139603	0.725217	0.650467	0.554678
203_205150_S	0.0876907	0.540192	0.0998827	0.380239	0.954699	0.193576	0.299275	0.275522	0.248722	0.770173	0.638955	0.0873412	0.69762	0.706321	0.65236	0.889096	0.752973	0.704202	0.0918198	0.553352	0.0976211	0.416405	0.837967	0.596487	0.392759	0.749809	0.28472	0.977689	0.269627	0.871616	0.612278	0.593963	0.012864	0.0337611	0.448456	0.71539	0.547474	0.755051	0.862381	0.892249	0.103399	0.540317	0.43957	0.913009	0.205703	0.164898	0.47197	0.140378	0.115203
203_205968_S	0.386723	0.709632	0.339733	0.907177	0.44566	0.824651	0.419748	0.987974	0.614208	0.818244	0.467839	0.960945	0.775279	0.182887	0.74243	0.842014	0.565332	0.86471	0.441944	0.69853	0.365723	0.861699	0.470956	0.746348	0.728372	0.824135	0.297651	0.460525	0.522179	0.876006	0.920684	0.586946	0.0968766	0.0236093	0.801523	0.418832	0.978853	0.858372	0.30664	0.119341	0.418576	0.514366	0.0678916	0.32007	0.0665865	0.0880859	0.0675135	0.0906621	0.13412
30_2386811_S	0.559703	0.172044	0.731344	0.910504	0.359355	0.534691	0.821218	0.674162	0.37166	0.84963	0.885936	0.382342	0.184627	0.575984	0.957471	0.0482978	0.028636	0.270901	0.547611	0.162827	0.792239	0.618127	0.229878	0.254525	0.893679	0.211041	0.399575	0.0878867	0.983144	0.245144	0.208516	0.202933	0.0231089	0.0826804	0.754529	0.872196	0.666663	0.777108	0.990581	0.442083	0.272326	0.695697	0.355242	0.722492	0.212116	0.117012	0.665721	0.0976599	0.0595325
30_2387242_S	0.977734	0.209516	0.792187	0.620734	0.603257	0.143816	0.0929461	0.264535	0.335	0.83993	0.598566	0.0935752	0.558381	0.657285	0.530746	0.00612594	0.484923	0.0230434	0.949876	0.198955	0.809359	0.688987	0.128049	0.0921965	0.843403	0.0433332	0.75127	0.374476	0.150374	0.189254	0.575232	0.206257	0.652547	0.810432	0.452558	0.285976	0.414961	0.116401	0.963327	0.70414	0.152262	0.530568	0.612125	0.735539	0.14185	0.719246	0.714813	0.591179	0.541705
30_2387258_S	0.964145	0.155888	0.728554	0.710897	0.586995	0.15546	0.12729	0.291448	0.385948	0.777108	0.585483	0.0731923	0.508402	0.974539	0.445282	0.00285919	0.368658	0.0209562	0.97484	0.147412	0.724447	0.80476	0.121441	0.075578	0.884326	0.0353547	0.393477	0.462438	0.207922	0.134351	0.535314	0.125537	0.958365	0.481618	0.481125	0.29818	0.465394	0.172171	0.827875	0.783984	0.115341	0.592678	0.813857	0.965116	0.175873	0.946942	0.527273	0.344309	0.309917
342_112113_S	0.176845	0.331327	0.0449057	0.477055	0.279058	0.935819	0.504983	0.526727	0.469812	0.707301	0.357872	0.734929	0.00678169	0.986513	0.248799	0.0975096	0.108105	0.23549	0.243684	0.297269	0.164536	0.713917	0.97782	0.119966	0.394911	0.129067	0.888273	0.915133	0.533934	0.0582863	0.0527	0.0767418	0.0104817	0.044261	0.565165	0.631374	0.866686	0.984874	0.682795	0.540576	0.270614	0.902348	0.975342	0.81025	0.235172	0.571229	0.805664	0.0476114	0.0162943
342_112719_S	0.113442	0.331331	0.0273706	0.408176	0.39656	0.729938	0.647513	0.749147	0.418957	0.737418	0.264881	0.855	0.0127098	0.953242	0.258694	0.136094	0.0894563	0.190908	0.158119	0.303649	0.108285	0.642979	0.824251	0.102498	0.386639	0.109069	0.971475	0.998852	0.649331	0.026211	0.0215463	0.0342386	0.00645397	0.0322076	0.258465	0.253137	0.463954	0.814747	0.520817	0.564062	0.349198	0.777532	0.803654	0.93806	0.125505	0.576784	0.794009	0.0253923	0.00762277
342_112815_S	0.178921	0.590349	0.252472	0.127507	0.18929	0.504553	0.669178	0.644454	0.172003	0.677813	0.0472335	0.374469	0.551015	0.224092	0.1903	0.0511075	0.331005	0.00118137	0.225865	0.583517	0.457465	0.229735	0.370508	0.00286886	0.158637	0.00347007	0.168907	0.727178	0.341188	0.183974	0.185172	0.123426	0.0402531	0.0222152	0.279684	0.54328	0.257403	0.182162	0.279414	0.453756	0.355111	0.414378	0.226546	0.530433	0.729632	0.213037	0.895831	0.049007	0.0290415
342_113232_S	0.508188	0.961313	0.417331	0.380406	0.468417	0.369587	0.445137	0.581451	0.464989	0.28997	0.502268	0.970841	0.0185359	0.489132	0.117871	0.4645	0.0828025	0.0440105	0.601486	0.922873	0.681818	0.613089	0.595631	0.0442112	0.718023	0.0265441	0.591776	0.273936	0.490799	0.0326513	0.0462148	0.0175623	0.00258952	0.00105788	0.166436	0.232727	0.22909	0.295073	0.742907	0.595532	0.217745	0.793315	0.899737	0.966834	0.939107	0.286244	0.940573	0.00431287	0.00122546
342_113440_S	0.545238	0.409563	0.718613	0.523633	0.267928	0.660758	0.630621	0.676386	0.90517	0.666114	0.377484	0.982463	0.839473	0.743062	0.887285	0.629671	0.497081	0.221137	0.566944	0.409938	0.81701	0.476158	0.928174	0.377258	0.478817	0.442911	0.800939	0.358445	0.279698	0.1749	0.441218	0.117455	0.0050222	0.00972911	0.777628	0.454059	0.799672	0.281472	0.205718	0.972242	0.448602	0.359521	0.935697	0.345703	0.205216	0.0512864	0.46171	0.0256736	0.0145972
342_114160_S	0.561889	0.612099	0.424052	0.723637	0.957909	0.0744326	0.21861	0.0998245	0.981072	0.369542	0.42573	0.156719	0.150086	0.255053	0.228195	0.706201	0.0218963	0.075388	0.586639	0.629601	0.538652	0.973063	0.451311	0.138602	0.307377	0.0400578	0.120442	0.247166	0.694186	0.847054	0.254366	0.777355	0.409183	0.40698	0.149846	0.174621	0.184393	0.885532	0.255578	0.503117	0.156964	0.31007	0.295259	0.122778	0.264377	0.0166677	0.0136572	0.498091	0.714791
342_114222_S	0.230138	0.176197	0.338199	0.105918	0.0664579	0.255558	0.60018	0.198204	0.525496	0.229047	0.146882	0.0152663	0.124045	0.293838	0.225095	0.81957	0.209875	0.875945	0.178746	0.163404	0.207135	0.0920265	0.324248	0.598115	0.156185	0.881348	0.0529295	0.726079	0.142608	0.557576	0.74328	0.221426	4.93891e-10	2.33215e-07	0.537327	0.762362	0.583106	0.152737	0.81451	0.877423	6.65625e-06	0.740455	0.0221036	0.628017	0.0599995	4.25509e-07	0.0119125	0.000111634	7.45505e-05
342_114338_S	0.0858442	0.282781	0.0172704	0.398109	0.343933	0.662823	0.601688	0.823992	0.44619	0.740597	0.283383	0.857634	0.0126362	0.928182	0.258238	0.130245	0.0801496	0.184095	0.123407	0.259477	0.0764759	0.637093	0.887732	0.10375	0.421961	0.104744	0.992807	0.961121	0.615821	0.0185707	0.0164817	0.0225535	0.0065137	0.0257987	0.21106	0.223138	0.382045	0.705079	0.505679	0.63765	0.349266	0.76795	0.850453	0.948005	0.115598	0.638442	0.772026	0.0195285	0.00565755
342_114488_S	0.418621	0.894011	0.723599	0.718937	0.854365	0.902082	0.953796	0.935809	0.546268	0.55525	0.822723	0.393671	0.249821	0.609944	0.795883	0.50267	0.629013	0.384196	0.421906	0.916648	0.720964	0.648696	0.578748	0.673343	0.935755	0.657827	0.430317	0.481848	0.305225	0.461069	0.562476	0.606221	0.738241	0.55165	0.952346	0.639212	0.881584	0.854381	0.501283	0.868746	0.162053	0.532613	0.344144	0.829771	0.963017	0.457756	0.346217	0.853534	0.994556
342_114543_S	0.718747	0.161749	0.636588	0.212612	0.299562	0.497758	0.987965	0.322313	0.841938	0.202886	0.483719	0.158274	0.0938987	0.25433	0.302177	0.509373	0.473529	0.805083	0.579707	0.150343	0.949601	0.1957	0.471995	0.902906	0.514713	0.969565	0.120646	0.348952	0.750318	0.466985	0.343883	0.374998	0.00146848	0.040307	0.810344	0.720202	0.914022	0.291467	0.854278	0.850741	0.0329388	0.635844	0.178427	0.918333	0.672833	0.0260021	0.326312	0.0546742	0.0435842
342_114684_S	0.094421	0.275085	0.0191913	0.407313	0.322841	0.681539	0.620671	0.805203	0.440075	0.733192	0.28078	0.872395	0.011533	0.972172	0.257148	0.133603	0.0838014	0.197152	0.134429	0.251806	0.0826068	0.646904	0.928868	0.108511	0.414483	0.111252	0.918679	0.967881	0.592608	0.020483	0.0184966	0.024886	0.0074096	0.0273665	0.22136	0.232335	0.397203	0.725553	0.516548	0.629885	0.361469	0.791632	0.758857	0.941182	0.120456	0.643996	0.788695	0.0211502	0.00637057
342_114688_S	0.126841	0.406166	0.127915	0.885802	0.673028	0.080336	0.245775	0.144806	0.684659	0.749587	0.809825	0.107313	0.118557	0.177991	0.388087	0.348027	0.00548099	0.0409404	0.140448	0.421292	0.196712	0.549649	0.229082	0.0715339	0.583628	0.0224069	0.0707656	0.150825	0.771235	0.0552246	0.0529786	0.0822428	0.537791	0.84031	0.0552962	0.135736	0.095622	0.875237	0.846279	0.498066	0.105333	0.586926	0.20312	0.778715	0.252153	0.034757	0.117658	0.583593	0.380882
48_2128606_SD	0.644906	0.549191	0.782821	0.2015	0.834949	0.973728	0.675914	0.477485	0.20326	0.240858	0.0172617	0.730491	0.146089	0.000524467	0.039697	0.0224411	0.553416	0.154099	0.79802	0.570017	0.428254	0.301514	0.233389	0.0466395	0.0588729	0.104983	0.00356671	0.56379	0.128517	0.425992	0.642217	0.441864	0.227851	0.514921	0.642946	0.6334	0.91374	0.353355	0.91576	0.162045	0.947582	0.982498	0.0171746	0.709024	0.000307555	0.911142	0.444195	0.555321	0.35439
48_2129343_S	0.782644	0.887054	0.956655	0.256853	0.619046	0.141426	0.877984	0.0773923	0.44537	0.907862	0.063377	0.226971	0.332324	0.99679	0.947986	0.796307	0.0611277	0.879206	0.702488	0.867733	0.789411	0.186587	0.579789	0.844268	0.0722251	0.690345	0.583346	0.858847	0.114058	0.0859531	0.171768	0.0986314	0.00232682	0.014435	0.641908	0.84203	0.429471	0.756378	0.593723	0.14818	0.0828501	0.557746	0.668123	0.543195	0.368132	0.0203384	0.224491	0.0179307	0.00946273
48_2129749_S	0.139925	0.841709	0.205115	0.13645	0.999362	0.83924	0.360427	0.442602	0.61954	0.469517	0.0219253	0.855363	0.929915	0.101218	0.0807011	0.000152356	0.342929	0.0627454	0.21158	0.851253	0.547899	0.223603	0.2065	0.0289537	0.0968035	0.0520952	0.220357	0.340744	0.0686388	0.239792	0.233497	0.213198	0.177034	0.29504	0.427706	0.434984	0.631668	0.981189	0.472534	0.540155	0.607206	0.44073	0.213203	0.708571	0.00833611	0.876721	0.965373	0.237747	0.169594
7_1171190_S	0.560949	0.754114	0.412303	0.201869	0.411842	0.326967	0.476807	0.488502	0.015927	0.716808	0.00552449	0.967435	0.113633	0.698648	0.519161	0.0829243	0.110043	0.0746005	0.512254	0.791147	0.631467	0.413688	0.486756	0.0148552	0.0115758	0.0596847	0.77101	0.679483	0.575551	0.707629	0.378073	0.282213	0.0164016	0.0411155	0.49575	0.513968	0.633854	0.735827	0.619471	0.426544	0.547539	0.802958	0.701116	0.611181	0.599446	0.344175	0.645881	0.12223	0.0764396
7_1171233_S	0.445689	0.715143	0.880075	0.0192125	0.271366	0.0633916	0.308302	0.0993146	0.283447	0.0292655	0.0388283	0.658073	0.00763792	0.0788045	0.0415924	0.114714	0.119426	0.0924537	0.253707	0.657949	0.593974	0.0594487	0.727708	0.0128831	0.0386049	0.0345047	0.108366	0.835253	0.290422	0.707424	0.651699	0.83679	0.0341468	0.463351	0.0615664	0.166763	0.0615999	0.332275	0.12854	0.0913446	0.805817	0.387417	0.143474	0.123516	0.231564	0.296318	0.110381	0.839012	0.449238
7_1171268_S	0.10348	0.498383	0.56749	0.477151	0.598924	0.268197	0.0769987	0.242102	0.299454	0.191071	0.19508	0.521396	0.00131638	0.675051	0.0993704	0.234862	0.851569	0.468593	0.0810943	0.559322	0.31232	0.521959	0.855219	0.205316	0.156247	0.346126	0.531935	0.289613	0.567331	0.479166	0.185358	0.298276	0.791728	0.270111	0.325763	0.104484	0.345119	0.220201	0.539748	0.284739	0.917035	0.135472	0.481946	0.346231	0.0374392	0.605144	0.31198	0.2532	0.313625
7_1171324_S	0.463361	0.373541	0.389604	0.332873	0.822817	0.0989987	0.106108	0.0787104	0.92464	0.0179754	0.538917	0.902547	0.028704	0.445339	0.0211594	0.247712	0.572427	0.399629	0.261926	0.411353	0.138973	0.411685	0.513741	0.166056	0.368935	0.203376	0.57924	0.939588	0.285327	0.219893	0.183429	0.129674	0.45545	0.0267967	0.0702804	0.0701067	0.0499138	0.105346	0.0180937	0.0804887	0.325635	0.0356917	0.783392	0.00803504	0.000878031	0.00878573	0.00317041	0.0236807	0.0679818
7_1171370_S	0.567161	0.424309	0.987046	0.0389778	0.681439	0.221775	0.517758	0.219897	0.500129	0.00762822	0.0383735	0.891366	0.00469346	0.155921	0.0027948	0.00363604	0.0762171	0.00718399	0.326538	0.468125	0.407098	0.107225	0.196797	0.00111435	0.0625717	0.00194931	0.231936	0.317673	0.0148537	0.819933	0.687171	0.796008	0.0163415	0.412608	0.264827	0.360193	0.270975	0.93207	0.218316	0.243875	0.989496	0.590846	0.205547	0.158375	0.0110646	0.470799	0.0869945	0.709127	0.366666
7_1171525_S	0.700543	0.516638	0.867792	0.808282	0.680753	0.857886	0.979436	0.672313	0.156205	0.173755	0.537596	0.774866	0.436546	0.594281	0.184594	0.378185	0.670449	0.64407	0.884954	0.528864	0.618713	0.82491	0.672748	0.662873	0.561752	0.470749	0.766915	0.883405	0.30038	0.586183	0.577996	0.489698	0.847384	0.313481	0.609753	0.735986	0.492903	0.965595	0.142298	0.621198	0.376331	0.492177	0.560508	0.107319	0.0080453	0.103993	0.0552647	0.284306	0.428674
7_1171762_S	0.869654	0.300553	0.822389	0.186179	0.904123	0.315877	0.657953	0.327932	0.568401	0.0182133	0.0482983	0.832319	0.0406775	0.305262	0.0075743	0.00456784	0.0415068	0.014167	0.797293	0.326393	0.599636	0.378319	0.168588	0.00247262	0.0882911	0.00397671	0.469617	0.367656	0.0638518	0.905236	0.700958	0.691484	0.0289569	0.333675	0.312472	0.406112	0.32927	0.999954	0.2899	0.28575	0.838064	0.622358	0.306339	0.230028	0.0239422	0.465223	0.135617	0.630277	0.330586
7_1171919_S	0.47217	0.457275	0.318649	0.139241	0.980707	0.108574	0.229877	0.0797911	0.822663	0.0291973	0.311269	0.747853	0.251385	0.651086	0.0257328	0.370804	0.460607	0.157676	0.280803	0.481562	0.116032	0.21064	0.410263	0.0669875	0.231293	0.0930221	0.828849	0.670202	0.187194	0.197134	0.377895	0.233915	0.790451	0.222815	0.0747137	0.141171	0.0567589	0.167149	0.0482516	0.0655063	0.381331	0.201444	0.82744	0.023339	0.0046505	0.033902	0.00633906	0.113254	0.278111
7_1172074_S	0.903641	0.501482	0.592669	0.15047	0.710109	0.250974	0.550822	0.279986	0.499317	0.0431475	0.0788276	0.722851	0.0212507	0.226721	0.0228137	0.0168302	0.059155	0.0271838	0.631359	0.544476	0.852782	0.312274	0.286058	0.00577417	0.106786	0.00922524	0.435934	0.453572	0.156492	0.982061	0.384011	0.563524	0.0588664	0.458223	0.181168	0.303593	0.177618	0.596589	0.24568	0.200348	0.723426	0.619924	0.293781	0.197395	0.0466272	0.33839	0.107509	0.703311	0.360292
7_1172184_S	0.83858	0.71469	0.504277	0.737119	0.307182	0.263038	0.356816	0.329132	0.506214	0.207607	0.180922	0.106964	0.0263557	0.201054	0.208962	0.103214	0.112405	0.195229	0.654304	0.770268	0.861329	0.991137	0.887791	0.062314	0.186339	0.0971855	0.675766	0.883042	0.329327	0.57502	0.897218	0.866406	0.255196	0.774365	0.155145	0.240954	0.153361	0.642539	0.248661	0.201813	0.13989	0.54728	0.220514	0.221597	0.0854104	0.312777	0.131501	0.826801	0.847791
7_1172354_S	0.243985	0.500514	0.91685	0.348246	0.951425	0.00372027	0.000332724	0.00811723	0.00331942	0.60024	0.0163666	0.743217	0.106706	0.924881	0.547536	0.67947	0.55075	0.793738	0.17598	0.547775	0.596116	0.526469	0.6649	0.176376	0.00281984	0.62786	0.82312	0.297269	0.539815	0.235738	0.112316	0.147241	0.107812	0.0131807	0.00675148	0.00153972	0.00754151	0.000198075	0.157817	0.00805128	0.471094	0.0110736	0.344779	0.084528	0.196728	0.0245666	0.0565971	0.015503	0.0330337
7_1172369_S	0.46024	0.366956	0.641711	0.128254	0.881065	0.258436	0.511332	0.277625	0.497924	0.0473319	0.110785	0.998618	0.0311297	0.113319	0.0346542	0.0626321	0.211381	0.0577157	0.301218	0.401489	0.30903	0.232754	0.295636	0.0176247	0.131597	0.0272352	0.205633	0.605537	0.164283	0.683338	0.799426	0.956498	0.0534248	0.590917	0.221062	0.325111	0.210654	0.681966	0.262858	0.25164	0.985658	0.73793	0.133429	0.208499	0.0823283	0.549338	0.156783	0.895053	0.569929
7_1172444_S	0.394773	0.431455	0.48717	0.242439	0.650687	0.0217535	0.0299736	0.0280118	0.633275	0.0836782	0.47511	0.951302	0.137203	0.252544	0.153871	0.661831	0.371956	0.666806	0.232467	0.468856	0.233022	0.353539	0.529595	0.264541	0.221918	0.402739	0.346287	0.289186	0.832	0.138018	0.200189	0.086485	0.140259	0.00354314	0.00943025	0.0180122	0.0058462	0.00672675	0.00455983	0.0175793	0.170925	0.0125122	0.729897	0.00223715	0.00881916	0.000297587	0.000614428	0.00364374	0.0166055
7_1172657_S	0.408225	0.319667	0.407115	0.442072	0.40057	0.00317505	0.000165537	0.011521	0.0484057	0.315798	0.308488	0.610318	0.532616	0.478853	0.408901	0.408754	0.994933	0.888769	0.261677	0.346558	0.227782	0.537499	0.511777	0.510508	0.0602374	0.961268	0.775314	0.643503	0.903347	0.0982374	0.0384891	0.0367503	0.0248181	0.000329186	0.00265035	0.000536769	0.0033529	0.000350993	0.0500504	0.0111093	0.350493	0.00252765	0.743127	0.0183278	0.0861241	0.00854869	0.00884512	0.000828821	0.00235429
7_1172786_S	0.298875	0.440196	0.173251	0.857851	0.750668	0.3855	0.777116	0.428075	0.179275	0.115951	0.423136	0.962279	0.58727	0.106019	0.322238	0.885689	0.931789	0.96105	0.219304	0.451035	0.133513	0.80054	0.907889	0.959937	0.585376	0.791616	0.204548	0.979343	0.234747	0.0480645	0.178592	0.0510894	0.55912	0.0498041	0.20089	0.489246	0.185568	0.729294	0.0500106	0.437691	0.473846	0.368165	0.178645	0.0652557	0.0406664	0.108739	0.0444566	0.0335768	0.0510249
7_1173068_S	0.0871832	0.990742	0.656457	0.437086	0.429738	0.00753257	0.0008033	0.0144204	0.00513666	0.874292	0.0346517	0.670779	0.00292821	0.887084	0.922046	0.543148	0.783812	0.814326	0.0749295	0.909681	0.937065	0.595163	0.720648	0.398703	0.00701769	0.994347	0.936388	0.236906	0.372122	0.504819	0.21474	0.371049	0.248794	0.0620915	0.0120969	0.00228873	0.0134316	0.000472788	0.241452	0.014199	0.415198	0.0195896	0.903828	0.132626	0.304703	0.0404034	0.0898228	0.0669317	0.130865
7_1173102_S	0.058155	0.885733	0.867707	0.337783	0.490477	0.012611	0.00167701	0.0262637	0.0163206	0.798144	0.0482463	0.790659	0.00685723	0.974064	0.776293	0.836024	0.823903	0.983144	0.051515	0.960326	0.859281	0.461934	0.861702	0.332335	0.0132457	0.828133	0.883956	0.25074	0.429057	0.320435	0.173436	0.230617	0.190161	0.0405833	0.0150894	0.00391481	0.0175481	0.0011911	0.23494	0.0211815	0.528049	0.0247583	0.408277	0.146476	0.315649	0.0572482	0.11718	0.0441511	0.0777019
7_1173247_S	0.310229	0.949129	0.674565	0.147197	0.986808	0.0363177	0.0457798	0.0389285	0.624368	0.18517	0.477729	0.823485	0.0850765	0.325779	0.268257	0.802961	0.492891	0.838986	0.204412	0.999022	0.387667	0.221548	0.847143	0.384659	0.241746	0.568868	0.382752	0.158517	0.951821	0.204173	0.312462	0.133192	0.2583	0.00932428	0.0153412	0.0264289	0.00900917	0.00680402	0.0156356	0.0227104	0.248797	0.0366053	0.869703	0.00814268	0.0159059	0.00133286	0.0031433	0.0117026	0.038772
7_2189043_S	0.0274659	0.423496	0.0936329	0.849431	0.214685	0.273583	0.856613	0.294541	0.94039	0.993535	0.825453	0.178885	0.921007	0.327746	0.598788	0.0913156	0.00368058	0.220564	0.0374359	0.424127	0.146189	0.520889	0.156882	0.215878	0.680089	0.114324	0.860843	0.213671	0.513186	0.755808	0.813059	0.845822	0.024903	0.00764514	0.78396	0.653019	0.92178	0.303116	0.313535	0.770475	0.0178907	0.381996	0.848986	0.110977	0.00279567	4.99838e-05	0.00235652	0.0493602	0.106904
7_2189133_S	0.035579	0.433861	0.0466654	0.28512	0.73357	0.938177	0.925801	0.998228	0.855944	0.584997	0.760595	0.353527	0.0753277	0.136312	0.574453	0.0463431	0.00381141	0.458289	0.0667414	0.461234	0.112333	0.138951	0.508624	0.221978	0.802363	0.184481	0.470976	0.60677	0.361812	0.381278	0.698339	0.474237	0.264278	0.387152	0.750901	0.710634	0.641148	0.543454	0.446903	0.653272	0.0902821	0.469135	0.353759	0.387663	0.0344818	0.0106207	0.100651	0.580606	0.807364
7_2190290_S	0.000159823	0.602834	0.00266578	0.0622611	0.728046	0.0441459	0.473062	0.0497912	0.210733	0.188868	0.043745	0.110774	0.0446609	0.859152	0.0763935	0.0420552	0.000559972	0.129974	0.000740849	0.63177	0.0157768	0.0255578	0.497859	0.21785	0.0348575	0.0272486	0.564552	0.00201084	0.118711	0.00117031	0.0579294	0.00359568	0.360827	0.312535	0.129544	0.787833	0.141033	0.129222	0.674545	0.0196293	0.112367	0.21689	0.954203	0.444809	0.0952863	0.0363737	0.181274	0.172172	0.0899255
7_2190713_S	0.00935361	0.372735	0.017907	0.0401119	0.924835	0.587298	0.910867	0.789348	0.889682	0.918575	0.925373	0.103154	0.100101	0.288414	0.452552	0.0373674	0.000137482	0.428763	0.0156767	0.396866	0.0548663	0.0103637	0.644223	0.21414	0.890029	0.13948	0.911009	0.344574	0.116239	0.175177	0.629614	0.307562	0.0301607	0.398538	0.755497	0.924563	0.968872	0.512791	0.850269	0.988324	0.00975449	0.409181	0.628266	0.443134	0.120208	0.00155123	0.1052	0.583306	0.77173
7_2191068_S	0.370295	0.821913	0.148519	0.163374	0.143381	0.1042	0.7574	0.169346	0.968553	0.504574	0.582966	0.285239	0.0253538	0.197323	0.687113	0.111246	0.283013	0.892406	0.556274	0.778752	0.317575	0.140193	0.402579	0.498301	0.450301	0.594883	0.129594	0.371351	0.268871	0.206353	0.460417	0.113613	0.358585	0.0332253	0.317587	0.922811	0.313991	0.659301	0.841972	0.805771	0.265873	0.696786	0.276956	0.504063	0.687457	0.393875	0.233666	0.0825916	0.0718381
7_2191250_S	0.0013681	0.108148	0.0147142	0.0174294	0.122558	0.115319	0.289299	0.112297	0.226432	0.314929	0.0813437	0.113923	0.221059	0.970377	0.246705	0.113903	0.00202607	0.38254	0.00410149	0.112658	0.0424408	0.00775733	0.213949	0.458324	0.0671993	0.129091	0.45821	0.000401108	0.121382	0.0504937	0.210184	0.103703	0.0115785	0.359826	0.216462	0.360039	0.255103	0.462994	0.409389	0.157357	0.0698892	0.263379	0.674742	0.399532	0.188233	0.00502576	0.107925	0.784093	0.922559
7_2191312_S	0.257523	0.750464	0.118372	0.121362	0.278789	0.0602544	0.0750692	0.0476179	0.0104226	0.573464	0.0301235	0.241071	0.445267	0.974544	0.49458	0.612699	0.460597	0.540706	0.213367	0.749517	0.0808484	0.15097	0.883496	0.268677	0.0136421	0.689522	0.579097	0.0513193	0.482541	0.359102	0.363262	0.425079	0.0596759	0.290093	0.145367	0.151977	0.137353	0.104296	0.91283	0.133027	0.135482	0.96394	0.65406	0.7628	0.742945	0.206631	0.866052	0.772403	0.655329
7_2191654_S	0.000966228	0.117003	0.00858177	0.016974	0.248475	0.103428	0.27624	0.091388	0.212492	0.351908	0.0976196	0.0932078	0.240481	0.891978	0.23339	0.0384575	0.000852927	0.155684	0.00294058	0.121433	0.0281238	0.0067491	0.212647	0.245221	0.0721781	0.0456856	0.517655	8.39876e-05	0.191362	0.0445577	0.219882	0.0842184	0.0095219	0.438348	0.204996	0.353938	0.224703	0.414612	0.630832	0.137778	0.0550675	0.355155	0.764997	0.65098	0.132269	0.00599216	0.131043	0.852773	0.983379
7_2192024_S	0.011386	0.304359	0.0325628	0.206927	0.709667	0.37502	0.745666	0.421899	0.571777	0.381425	0.594018	0.235082	0.0245936	0.145519	0.126864	0.0212779	0.000354541	0.147099	0.02549	0.331449	0.112202	0.0859758	0.376253	0.103991	0.495753	0.031508	0.532453	0.0384892	0.232402	0.0719745	0.260308	0.122931	0.15734	0.736304	0.538988	0.829017	0.67999	0.99733	0.77888	0.728032	0.0269881	0.41377	0.30217	0.423437	0.0935645	0.00494777	0.0844303	0.992487	0.727859
7_2192648_S	0.538648	0.0587319	0.999838	0.374993	0.108621	0.918718	0.344097	0.884362	0.581633	0.82322	0.97971	0.873659	0.967708	0.920551	0.719016	0.924162	0.959443	0.965441	0.605177	0.057956	0.919669	0.426583	0.277945	0.902817	0.856042	0.929495	0.879376	0.188498	0.917138	0.340345	0.81934	0.330163	0.0266621	0.016285	0.835127	0.200059	0.883569	0.6686	0.636888	0.461556	0.599254	0.769898	0.587128	0.8855	0.719956	0.211565	0.432494	0.0600544	0.0467134
7_2192993_S	0.326988	0.502785	0.0623373	0.676059	0.224906	0.783136	0.809874	0.759426	0.712518	0.588742	0.668756	0.410449	0.146537	0.260236	0.559267	0.547944	0.0937254	0.693658	0.430612	0.479791	0.150165	0.497495	0.561538	0.406987	0.663369	0.433234	0.20287	0.373277	0.579872	0.380823	0.306354	0.156371	0.914368	0.510772	0.611285	0.773831	0.596021	0.610335	0.402614	0.512397	0.391473	0.246909	0.26275	0.392616	0.298323	0.179289	0.259841	0.667751	0.417622
7_2194080_S	0.00203213	0.794594	0.142195	0.185256	0.359108	0.0198797	0.20674	0.0129535	0.00743228	0.931923	0.00594236	0.141155	0.434465	0.735814	0.926658	0.394922	0.0895386	0.952631	0.00279329	0.820733	0.122225	0.170571	0.790497	0.527288	0.00288212	0.722227	0.693844	0.059056	0.419673	0.0472021	0.209009	0.0692175	0.599663	0.505906	0.0985142	0.597183	0.0681168	0.0107792	0.593819	0.00564046	0.125414	0.7354	0.96372	0.71939	0.815949	0.47387	0.863406	0.246112	0.274897
7_2194931_S	0.0238482	0.479894	0.089128	0.0587408	0.0918621	0.121568	0.193316	0.113129	0.051383	0.332057	0.0835299	0.200456	0.259525	0.878389	0.314172	0.556625	0.229451	0.618684	0.0213697	0.456119	0.0584044	0.062869	0.487987	0.3613	0.0512628	0.720722	0.482357	0.160711	0.542331	0.421207	0.494408	0.532514	0.0278867	0.16837	0.236963	0.246675	0.244203	0.272501	0.921104	0.263765	0.111598	0.980789	0.690172	0.800913	0.666788	0.125296	0.722719	0.551599	0.462989
7_2195659_S	0.0200051	0.38479	0.093023	0.174078	0.0509127	0.175628	0.240029	0.190845	0.101825	0.539268	0.14893	0.19278	0.279961	0.850579	0.577227	0.570381	0.174436	0.821515	0.0213512	0.363544	0.0786091	0.15848	0.305432	0.580631	0.100942	0.961426	0.458358	0.155222	0.739174	0.462677	0.355672	0.647871	0.0322023	0.0773885	0.27357	0.273193	0.3117	0.409999	0.786542	0.397763	0.106657	0.653344	0.664984	0.722469	0.367559	0.0603631	0.343357	0.379526	0.361895
83_144212_S	0.778123	0.547054	0.843505	0.235481	0.406955	0.530271	0.618081	0.390411	0.184162	0.718019	0.0602294	0.451065	0.88742	0.617508	0.36117	0.0923977	0.532713	0.599958	0.877456	0.541758	0.627513	0.350473	0.990737	0.253216	0.0885362	0.489689	0.953354	0.659252	0.133203	0.588204	0.566756	0.365224	0.0185119	0.0707151	0.55623	0.860322	0.519211	0.225614	0.126769	0.913041	0.452679	0.117005	0.739954	0.301592	0.603101	0.0291701	0.147316	0.0844387	0.0970702
83_144380_S	0.359095	0.245463	0.275001	0.608474	0.94134	0.683108	0.608175	0.621631	0.404085	0.759644	0.311438	0.591521	0.945007	0.896728	0.324622	0.603798	0.175015	0.514803	0.401452	0.243051	0.265284	0.514135	0.84927	0.675871	0.335973	0.400293	0.72903	0.0060438	0.882123	0.25386	0.662198	0.561824	0.681433	0.677274	0.769527	0.814427	0.834857	0.841681	0.812267	0.969816	0.626498	0.843608	0.951384	0.727643	0.189088	0.889703	0.731261	0.843736	0.883515
83_144881_S	0.334461	0.0910146	0.899881	0.434563	0.0764654	0.206506	0.252873	0.26745	0.766902	0.70144	0.380151	0.720314	0.180016	0.241759	0.72322	0.628762	0.103256	0.504466	0.304516	0.083162	0.950841	0.32875	0.158114	0.715421	0.320113	0.439217	0.439725	0.233469	0.776142	0.830702	0.690322	0.887556	0.195791	0.251843	0.279691	0.270933	0.355631	0.910423	0.566761	0.732852	0.762266	0.431647	0.209783	0.902071	0.657714	0.226274	0.611518	0.520904	0.491084
83_145083_S	0.0688036	0.661978	0.166335	0.072528	0.346485	0.716855	0.627286	0.726669	0.308523	0.116443	0.626546	0.596912	0.250388	0.582366	0.390402	0.26126	0.0771025	0.831878	0.0664673	0.678698	0.1758	0.0434769	0.399629	0.900854	0.957897	0.900205	0.496997	0.783986	0.0150009	0.771662	0.618721	0.785883	0.0470878	0.590309	0.40975	0.91378	0.376508	0.0722377	0.950646	0.427149	0.966174	0.821717	0.4785	0.867182	0.272576	0.080465	0.615903	0.374975	0.402645
83_459657_SD	0.847038	0.855223	0.579131	0.562549	0.237395	0.0456246	0.139105	0.0441243	0.14199	0.95005	0.0687971	0.524546	0.986114	0.505796	0.413041	0.722002	0.252305	0.619392	0.747388	0.843886	0.367716	0.775623	0.751532	0.22584	0.0397796	0.50274	0.412191	0.624005	0.747848	0.358405	0.495402	0.710825	0.172524	0.165143	0.0772893	0.344836	0.0952219	0.527727	0.896657	0.0984721	0.492077	0.770032	0.328321	0.930318	0.450986	0.357826	0.661789	0.656771	0.567152
83_460830_S	0.021556	0.44518	0.0432183	0.0113903	0.242333	0.578976	0.786897	0.456687	0.175798	0.0091896	0.817903	0.49444	0.0577203	0.887838	0.0677103	0.169144	0.140375	0.345919	0.016544	0.471207	0.0372034	0.00725949	0.218036	0.521569	0.580375	0.341688	0.665273	0.613401	0.0096843	0.917906	0.575565	0.866153	0.0887295	0.987602	0.482854	0.865227	0.364781	0.0499713	0.35296	0.193622	0.669774	0.503421	0.895144	0.395581	0.118339	0.319244	0.597681	0.683733	0.633183
83_461217_S	0.558065	0.272261	0.319354	0.965455	0.0142117	0.175314	0.231873	0.162193	0.108314	0.444016	0.110755	0.706131	0.64057	0.60383	0.703721	0.369493	0.118347	0.325591	0.596771	0.262683	0.539916	0.770196	0.321033	0.14562	0.0803859	0.2877	0.55824	0.802273	0.686537	0.990264	0.979003	0.487774	0.0492906	0.0072492	0.301037	0.600722	0.377918	0.914165	0.337015	0.339223	0.490344	0.366467	0.274824	0.486874	0.383547	0.173451	0.35442	0.110483	0.0813963
83_461386_S	0.270381	0.695922	0.342865	0.78269	0.0629019	0.114615	0.170814	0.0887378	0.0488574	0.653203	0.0598857	0.802327	0.887676	0.729546	0.496595	0.407055	0.0469742	0.22646	0.352412	0.683837	0.645362	0.498031	0.663375	0.0696253	0.0374704	0.176042	0.69676	0.626899	0.767956	0.861776	0.837779	0.638445	0.114678	0.0267628	0.222063	0.518082	0.264829	0.637605	0.502945	0.201748	0.577313	0.538674	0.358373	0.719249	0.688174	0.344504	0.64469	0.249146	0.175938
83_461643_S	0.515969	0.2328	0.747086	0.377495	0.130393	0.438669	0.468365	0.357038	0.228806	0.832743	0.201818	0.406039	0.18333	0.997144	0.595589	0.374738	0.929589	0.622933	0.497178	0.217487	0.609018	0.456679	0.29015	0.792945	0.190708	0.838615	0.703835	0.722891	0.46089	0.735709	0.806302	0.491833	0.0304602	0.083118	0.798463	0.958458	0.763951	0.38789	0.249443	0.92766	0.523533	0.306177	0.954782	0.43322	0.918108	0.0541737	0.148638	0.12246	0.142404
9_1264427_S	0.662846	0.564587	0.468751	0.0626881	0.178776	0.782994	0.248029	0.94996	0.18786	0.681516	0.910918	0.0311499	0.112623	0.206929	0.660312	0.726442	0.140547	0.689318	0.752545	0.598457	0.460976	0.0398685	0.255234	0.939739	0.868737	0.987092	0.968207	0.971542	0.0178681	0.705738	0.121576	0.372111	0.130357	0.626021	0.877914	0.369372	0.947997	0.113264	0.787425	0.890983	0.0322742	0.307614	0.209388	0.732994	0.859607	0.173794	0.90373	0.417462	0.36282
9_1264687_S	0.948865	0.741595	0.982065	0.136244	0.317943	0.430725	0.945828	0.664088	0.227136	0.601039	0.908666	0.154831	0.45111	0.113048	0.860011	0.920832	0.211615	0.815191	0.938427	0.754903	0.976393	0.0963078	0.432628	0.926986	0.903882	0.962809	0.534552	0.729756	0.0907647	0.994045	0.647431	0.691625	0.125886	0.428067	0.382523	0.71529	0.48144	0.263469	0.972057	0.969863	0.111884	0.569573	0.170742	0.556138	0.604402	0.146921	0.635812	0.453719	0.430625
9_1264886_S	0.82405	0.423789	0.731855	0.372646	0.586314	0.321726	0.0299559	0.30759	0.922362	0.656887	0.782134	0.215945	0.116188	0.0226029	0.312397	0.532484	0.406557	0.388408	0.951567	0.458796	0.516965	0.329573	0.975527	0.370225	0.860909	0.324833	0.0169594	0.23933	0.294016	0.619123	0.552992	0.557858	0.457013	0.202504	0.117187	0.0190665	0.125741	0.298156	0.935157	0.575898	0.373958	0.399982	0.0959265	0.879585	0.233951	0.813145	0.628183	0.540292	0.360366
9_1265027_S	0.743004	0.538802	0.969824	0.923932	0.872194	0.607547	0.940751	0.509745	0.852059	0.909527	0.793459	0.759126	0.898384	0.037321	0.857644	0.271336	0.749552	0.325984	0.810327	0.54157	0.932329	0.88014	0.561382	0.419189	0.720299	0.417712	0.0716872	0.985869	0.98104	0.723122	0.558725	0.799465	0.534418	0.953141	0.456716	0.954518	0.269189	0.188439	0.600088	0.085439	0.716009	0.816469	0.0779125	0.416133	0.55999	0.410928	0.11192	0.877426	0.775132
9_1265081_S	0.744186	0.542117	0.969651	0.915429	0.877318	0.603538	0.934861	0.506191	0.846654	0.9253	0.789922	0.754447	0.896962	0.0361376	0.874823	0.268285	0.754258	0.333752	0.809659	0.544971	0.935838	0.872718	0.568637	0.426313	0.715823	0.427629	0.0696533	0.991601	0.985145	0.723475	0.561767	0.799054	0.537081	0.959169	0.452761	0.95031	0.266089	0.185477	0.608466	0.0843216	0.711136	0.817336	0.0758809	0.426061	0.546391	0.416468	0.117378	0.880987	0.773454
9_1266000_SD	0.146279	0.657802	0.106235	0.418092	0.0852201	0.440374	0.501489	0.656806	0.41535	0.145247	0.162215	0.644196	0.00644169	0.290316	0.00437442	0.0205564	0.0798863	0.00432214	0.24321	0.615146	0.427799	0.662778	0.717108	0.00314471	0.347741	0.00202363	0.525064	0.809148	0.622667	0.0819252	0.122258	0.106048	0.123153	0.0639229	0.198188	0.263836	0.280933	0.492583	0.778647	0.962891	0.671582	0.346282	0.20458	0.138357	0.0381004	0.832314	0.175774	0.137559	0.0467273
9_1266031_SD	0.330973	0.48844	0.26267	0.222473	0.928638	0.83769	0.389436	0.580611	0.374522	0.289928	0.939684	0.332495	0.755888	0.719654	0.425813	0.469714	0.863087	0.194504	0.457323	0.489285	0.396625	0.245332	0.593855	0.335658	0.742254	0.219938	0.469173	0.643683	0.384675	0.469957	0.24558	0.405816	0.74585	0.754154	0.79796	0.828128	0.815088	0.612536	0.186603	0.803628	0.801729	0.399171	0.589806	0.157524	0.268371	0.579823	0.125403	0.815151	0.531752
[truncated: 12 more columns]

## Sheet: Sheet 1
Supporting Table S4. P-values for all the association tests carried under model B.
	DFR												UFGT																			MYCB										LDOX			F3'HB			CHSA
Phenotype\SNP	s1	s2	s3	s4	s5	s6	s7	s8	s9	s10	s11	s12	s13	s14	s15	s16	s17	s18	s19	s20	s21	s22	s23	s24	s25	s26	s27	s28	s29	s30	s31	s32	s33	s34	s35	s36	s37	s38	s39	s40	s41	s42	s43	s44	s45	s46	s47	s48	s49
Delphinidin-3-monoglucoside (relative abundance)	0.647563	0.128268	0.0763182	0.285381	0.920495	0.887742	0.425029	0.647453	1	0.0050945	0.140342	0.171352	0.0567579	1	0.0440479	0.0946856	1	0.243772	0.107212	0.538681	0.920484	0.887735	0.218169	0.417969	0.00245214	1	0.566574	0.823385	0.708851	0.655417	0.3166	0.887742	0.0513752	0.0504637	0.369655	0.591194	0.0378769	0.584761	0.333903	0.0396669	0.764613	0.259278	0.578709	0.764723	0.920486	0.111989	0.543983	1	0.263506
Cyanidin-3-monoglucoside (relative abundance)	*	*	*	*	*	*	0.752587	*	*	*	*	*	*	*	*	*	*	*	*	*	*	*	*	*	*	*	*	*	*	*	*	0.598264	*	*	*	*	*	*	*	*	*	*	*	*	*	*	*	*	*
Petunidin-3-monoglucoside (relative abundance)	0.791766	0.041998	0.109911	0.15643	0.887751	0.806857	0.339129	0.672002	0.791734	0.0326975	0.269364	0.259833	0.256106	0.447566	0.20799	0.168014	0.489546	0.133322	0.116152	1	0.708831	0.71896	0.202538	1	0.00209576	0.887743	0.572494	0.777715	0.920488	0.632267	0.591052	0.597558	0.0941101	0.0735002	0.617849	1	0.0739254	0.336538	0.718957	0.0743819	0.323859	0.681257	0.27157	0.350276	0.597527	0.161706	0.201065	0.523047	0.86273
Peonidin-3-monoglucoside (relative abundance)	0.075689	0.129111	0.400902	0.791723	0.381811	0.157511	1	0.030762	0.336626	0.489621	0.920493	1	1	0.360984	1	0.0162928	0.355335	0.013664	1	0.0156622	0.680729	0.012631	0.0959261	0.134202	0.0978613	0.480667	0.300555	0.247227	0.360996	0.718983	0.311897	0.887746	0.887739	0.699107	0.271283	0.841811	0.699111	0.190576	0.432369	0.672015	0.153409	0.111121	0.296374	0.920525	1	0.247375	0.265467	0.0246488	0.451492
Malvidin-3-monoglucoside (relative abundance)	0.549824	0.625038	0.718987	1	0.920522	0.680791	0.414404	0.347138	0.823494	0.528167	0.0443033	0.467991	0.229594	0.680854	0.223386	0.0236702	0.518098	0.0781158	0.463891	0.0574446	0.49882	0.107893	0.0457635	0.5787	0.258045	0.498811	0.533547	0.183127	1	0.841808	0.708905	0.198418	0.331529	0.309619	0.21999	0.807108	0.275287	0.166403	0.312201	0.256262	0.139559	0.920884	0.841927	0.841964	0.791776	0.324142	1	0.823417	0.647504
Delphinidin-3-monoglucoside-acetate (relative abundance)	0.439923	0.0431375	0.222974	0.319061	0.591064	0.604164	0.0392013	0.624978	0.647458	0.0319743	0.528121	0.100394	0.38479	0.920482	0.369633	0.334038	1	0.084507	0.544034	0.53342	0.655417	0.436097	0.156563	0.823396	0.00281076	0.862758	0.485073	0.689798	0.841777	0.624973	0.841765	0.708881	0.0776036	0.0726588	0.549476	0.0193606	0.0415204	0.494074	0.680717	0.0408402	0.400822	0.597748	0.672276	0.729582	0.417901	1	0.533331	0.472107	0.920483
Cyanidin-3-monoglucoside-acetate (relative abundance)	0.823498	0.417949	0.823396	0.920487	0.752393	0.42557	0.467806	0.333926	0.752398	0.00422726	0.358372	0.400912	0.394467	0.277258	0.321634	0.421442	0.215261	0.161639	0.533346	0.655443	0.639775	0.806855	0.655438	0.523047	0.232216	0.699119	0.591076	0.316612	0.436135	0.451574	0.16371	0.624995	0.233786	0.248937	0.764646	0.0502124	0.222685	0.104053	0.823409	0.240377	0.0561585	0.400033	0.0567015	0.359193	0.663629	0.122136	0.48957	0.80686	0.729555
Petunidin-3-monoglucoside-acetate (relative abundance)	0.25806	0.0163198	0.171742	0.249093	0.366714	0.384832	0.0197625	0.617895	0.407549	0.0577794	0.41792	0.0786196	0.663593	0.862732	0.639775	0.443845	0.718968	0.064731	0.887758	0.283523	0.655443	0.227432	0.0943807	0.689789	0.00210847	0.655483	0.42867	1	1	0.708851	0.920488	0.8418	0.0776342	0.0731225	0.560788	0.0156253	0.0437421	0.689745	0.74063	0.0432568	0.560729	0.578692	0.862792	0.823392	0.224225	0.708872	0.347163	0.222921	0.764619
Peonidin-3-monoglucoside-acetate (relative abundance)	0.37567	0.421563	0.245889	0.179623	0.632267	0.414463	0.503593	0.0876736	0.663569	0.207123	0.344382	0.887765	1	0.391101	0.823404	0.791806	0.400881	0.388097	0.777734	0.591194	1	0.639797	0.116501	0.14326	0.000251543	0.862782	0.224283	0.764679	0.128465	0.113299	0.333974	0.740758	0.148577	0.183095	0.617889	1.89898e-05	0.152422	0.0314498	0.752294	0.154419	0.0107372	0.719013	0.672267	0.29391	0.862746	0.729599	0.421721	0.202735	0.358127
Delphinidin-3-monoglucoside-p-coumarate (relative abundance)	1	0.411086	0.920492	0.432448	0.823543	0.823437	0.920498	0.729574	1	1	0.181582	0.604236	0.350185	0.823457	0.397938	0.0526228	0.86277	0.375893	0.132884	0.777747	0.432459	0.887749	0.806952	0.518145	0.765134	0.439974	0.82349	0.188033	0.841796	0.699239	0.494288	0.887811	0.039589	0.0249818	1	0.690468	0.0185951	0.45983	1	0.0186063	0.663651	0.155825	0.222207	0.888019	0.841819	0.672159	0.777747	0.472137	0.841786
Malvidin-3-monoglucoside-acetate (relative abundance)	0.0260912	0.202474	0.791776	0.887749	0.166933	0.131661	0.258154	0.252551	0.131566	0.617991	0.243772	0.485169	0.887738	0.480635	0.862739	0.764656	0.250743	0.225979	0.841782	0.459698	0.841775	0.344416	0.11276	0.523047	0.000669689	0.485188	0.543976	0.672054	0.791737	0.777718	0.523009	1	0.118263	0.0902029	0.887743	0.00588877	0.0597815	0.777701	0.82338	0.0612149	0.79171	0.75237	0.0846298	0.708847	0.190516	0.205346	0.336587	0.258122	0.16583
Peonidin-3-monoglucoside-caffeoate (relative abundance)	0.153087	0.806862	0.218213	0.279264	0.364162	0.326568	0.88774	0.261695	0.331747	0.242139	0.275534	0.238773	0.209923	0.202641	0.20997	0.88774	0.281344	0.806873	0.252935	0.39768	0.411	0.27523	0.791743	1	1	0.480675	0.86278	0.699115	0.729578	0.887754	0.323983	0.18078	1	0.841769	0.597604	0.00981458	1	0.555199	0.862756	1	0.0782146	0.45843	0.508604	1	0.287646	1	0.476372	0.328939	0.273207
Cyanidin-3-monoglucoside-p-coumarate (relative abundance)	0.887745	0.247269	0.198605	0.407599	0.352539	0.467868	0.632294	0.142955	0.331354	0.0293465	0.281235	0.74067	0.263545	0.166874	0.210869	0.414573	0.225779	1	0.202505	0.0610594	0.699111	0.261695	0.920503	0.632289	0.152519	0.560809	0.387937	0.718996	0.663603	0.285394	0.513043	0.227463	0.0709661	0.0522907	0.046878	0.555067	0.0587265	0.0292147	0.0378769	0.0680668	0.0368158	0.752357	0.298337	0.920487	0.610912	0.920493	0.503473	0.639785	0.33648
Malvidin-3-monoglucoside-caffeoate (relative abundance)	0.572927	0.555489	*	*	*	*	0.29682	1	0.70948	*	*	*	0.67297	0.740933	0.719765	*	0.292302	*	*	0.115446	0.178609	*	0.504574	0.267834	*	0.256294	0.280659	0.277258	0.100568	0.182607	0.379178	*	0.672159	0.689862	0.663847	*	*	0.663916	1	*	*	0.326679	1	0.220037	*	*	0.503624	0.250905	0.334165
Petunidin-3-monoglucoside-p-coumarate (relative abundance)	0.498952	0.425038	0.604164	0.777715	0.862768	0.498768	0.777706	0.439848	0.625026	0.480701	0.119155	0.25432	0.764629	1	0.862748	0.485057	0.517991	0.372639	0.34449	0.887746	0.920483	1	0.88774	0.632289	0.862867	0.610917	0.920496	0.148545	0.806865	0.597558	0.777715	0.887749	0.0289684	0.0158555	0.528151	0.578832	0.0124521	0.591101	0.632272	0.0129386	0.699119	0.287706	0.13293	0.490012	1	0.791753	0.61786	0.213765	0.311873
Cis-Malvidin-3-monoglucoside-p-coumarate (relative abundance)	0.0702532	0.920487	0.0554933	0.240405	0.47647	0.341832	0.729551	0.0875417	0.341845	0.0229594	0.129294	0.0919241	0.366868	0.663608	0.326583	0.319012	0.436126	0.663598	0.305203	0.806865	0.610923	0.485089	0.425076	0.887759	0.0673751	0.610917	0.823425	0.459551	0.740651	0.518054	0.862742	0.920493	0.16379	0.1091	0.0393221	0.287908	0.113266	0.777747	0.122119	0.117609	0.823392	0.741263	0.099445	0.379394	0.24564	0.920501	0.296126	0.57254	0.463653
Peonidin-3-monoglucoside-p-coumarate (relative abundance)	0.920495	0.49872	0.443791	0.791726	0.339117	1	0.2338	0.74063	0.533295	0.428813	0.597533	0.0089873	0.806842	0.273143	0.777701	0.363838	0.663569	0.729551	1	0.160641	1	0.141109	0.752314	0.109116	0.823425	0.841791	0.083889	0.179491	0.271269	0.203802	0.347047	0.708855	0.0637726	0.0935089	0.79172	0.067756	0.0853765	0.549436	0.777698	0.0890855	0.489523	0.729702	0.699164	0.689793	0.572488	0.86275	0.632272	0.523063	0.764604
Malvidin-3-monoglucoside-p-coumarate (relative abundance)	0.0774712	0.76461	0.0120164	0.134137	0.459616	0.144845	0.169103	0.107713	0.165892	0.00441624	0.256217	0.160513	0.887739	0.639759	0.791732	0.549449	0.323871	0.432369	0.752314	0.764635	0.76461	0.72954	0.455516	0.555088	0.740805	1	0.841777	0.718968	1	0.729558	0.841765	0.887743	0.0186956	0.0136064	0.307274	0.476481	0.00920265	0.920488	0.494097	0.00976517	0.920484	1	0.0264232	0.063538	0.920486	0.584807	0.718972	0.188049	0.307225
Sum of delphinidin derivatives (relative abundance)	0.672159	0.131582	0.0925006	0.259833	0.86278	0.920492	0.414404	0.764613	1	0.00632337	0.256326	0.25982	0.0504902	0.823404	0.0393502	0.0612149	0.823394	0.212296	0.0661534	0.689789	0.823392	0.740637	0.205217	0.296227	0.00167854	0.841771	0.400968	0.862737	0.544019	0.862752	0.339177	0.887748	0.0493756	0.04057	0.503464	0.578854	0.0305784	0.617927	0.455525	0.0316623	0.823392	0.453072	0.740775	0.807024	0.887749	0.12781	0.518022	0.920491	0.257975
Sum of cyanidin derivatives (relative abundance)	*	*	*	*	*	*	0.764861	*	*	*	*	*	*	*	*	*	*	*	*	*	*	*	*	*	*	*	*	*	*	*	*	0.567271	*	*	*	*	*	*	*	*	*	*	*	*	*	*	*	*	*
Sum of petunidin derivatives (relative abundance)	0.920526	0.0368519	0.209454	0.188033	0.764765	0.578652	0.36094	0.920484	0.617991	0.0787546	0.625058	0.451536	0.232446	0.37881	0.194892	0.126707	0.355394	0.0958787	0.0800858	0.823399	0.887738	0.560767	0.188018	0.672085	0.00218675	1	0.432448	0.699115	0.79174	0.823412	0.55511	0.699132	0.054822	0.0368277	0.672069	0.920585	0.034225	0.361332	0.764632	0.0327618	0.447641	0.413937	0.578937	0.412557	0.572606	0.205681	0.185642	0.387969	0.80685
Sum of peonidin derivatives (relative abundance)	0.0889709	0.153394	0.4215	0.672024	0.324024	0.198434	0.887736	0.0541596	0.305112	0.538641	1	0.672029	1	0.261722	1	0.0154389	0.307287	0.020008	0.920497	0.0110454	0.680734	0.00869236	0.139383	0.0810246	0.126088	0.459551	0.18078	0.189262	0.256188	0.538626	0.240405	0.806868	0.806852	1	0.321497	0.48975	1	0.339165	0.494121	1	0.287477	0.133814	0.385084	0.887798	1	0.316742	0.269309	0.0479988	0.604135
Sum of malvidin derivatives (relative abundance)	0.117343	0.699136	0.137637	0.459569	0.655507	0.560809	1	0.0913358	0.350055	0.0416557	0.578676	1	0.339404	0.647521	0.303043	0.0839832	0.381765	0.0740294	0.611034	0.137722	0.610941	0.202443	0.0734349	0.560839	0.379443	0.740644	0.625051	0.517991	1	0.639814	0.79174	0.432398	0.0445842	0.0331208	0.764646	0.468227	0.0252019	0.489677	0.764642	0.0247971	0.36677	1	0.277735	0.490078	1	0.887765	0.777727	0.533377	0.604158
Sum of monoglucosides (relative abundance)	0.0755339	0.699103	0.100821	0.467814	0.508213	0.134169	0.508205	0.107698	0.209394	0.0670252	0.143888	0.189262	0.887732	0.718953	1	0.51305	0.291691	0.27921	0.610923	0.77774	0.708835	0.689749	0.281274	0.572513	0.440089	0.862744	0.887738	0.624967	1	0.597533	0.887733	0.823394	0.00509964	0.00348435	0.508198	0.0763182	0.00193358	0.59751	0.671998	0.00211084	0.647453	0.862844	0.0290966	0.194628	0.76461	0.494172	0.55506	0.109826	0.259754
Sum of acetate derivatives (relative abundance)	0.044062	0.103514	0.740737	0.672091	0.259847	0.170309	0.141574	0.233941	0.235405	0.6809	0.248964	0.303135	0.74067	0.823385	0.708881	0.764705	0.54949	0.13536	0.920503	0.639928	0.920502	0.455582	0.0714166	0.841798	9.5301e-05	0.611041	0.740644	1	0.841788	0.443761	0.86275	0.887778	0.0591873	0.0523614	0.862762	0.00085247	0.0291308	0.489562	0.862742	0.0291428	0.391091	0.740651	0.260048	0.920484	0.289619	0.421632	0.555165	0.227708	0.256217
Sum of coumarate derivatives (relative abundance)	0.149783	0.887733	0.0390992	0.314249	0.689775	0.218198	0.197012	0.150424	0.298245	0.0206996	0.205217	0.0713741	1	0.806842	0.920483	0.604135	0.35529	0.498728	0.584755	1	0.699107	1	0.538597	0.672029	0.680893	0.920487	1	0.480659	1	0.604147	1	0.841773	0.00911167	0.00675794	0.316612	0.428791	0.00426835	0.752291	0.485049	0.00457108	0.862732	1	0.0320421	0.11714	0.887736	0.672054	0.740637	0.165892	0.352495
Sum of caffeoate derivatives (relative abundance)	0.260688	0.647632	0.862758	0.489697	0.41568	*	0.494332	0.566608	0.862902	0.841786	0.303544	0.719156	0.323322	0.729748	0.354407	0.296524	0.719088	*	0.115922	0.414661	0.171585	0.591202	0.618431	0.401178	0.401071	0.201209	0.440522	0.49876	0.143323	0.271707	0.806932	0.752482	0.70892	0.719026	0.451933	*	0.584875	0.489981	0.84185	0.572647	0.168492	0.217246	0.842001	0.207889	0.394774	*	0.41117	0.680781	0.680802
Sum of coumaryl/Sum acetyl (relative abundance)	0.0101848	0.101569	0.740753	0.43255	0.0396644	0.0282526	0.12703	0.214076	0.0334678	0.663803	0.719022	0.125693	0.862768	0.617908	1	0.538761	0.57259	0.480827	0.71905	1	1	0.823467	0.647583	0.920508	0.0166273	0.538877	0.777754	1	0.41473	0.68083	0.647538	0.920506	0.841796	0.9205	0.0628921	0.202641	0.764656	0.572575	0.12373	0.752341	0.920496	1	0.538771	0.862792	0.432526	1	0.555208	0.555226	0.142309
Sum trihydroxylated/Sum dihydroxylated (relative abundance)	0.0985712	0.791723	0.132497	0.17597	0.19461	0.498776	0.791715	0.699111	0.0909331	0.0810082	0.394397	0.328914	0.639802	0.203847	0.708877	0.012311	0.163741	0.0149529	0.237255	0.107841	0.80685	0.0771408	0.0203296	0.173714	0.0546315	0.190546	0.212341	0.414423	0.624984	0.887743	0.485081	0.328901	0.316637	0.166903	0.729566	0.841831	0.178263	0.116204	0.680742	0.160528	0.134137	0.752745	0.355681	0.418398	0.447603	0.611012	0.363838	0.428718	0.689753
Delphinidin-3-monoglucoside (concentration in mg anthocyanin/kg of berries)	0.663829	0.0913675	0.161639	0.228982	0.86278	0.699136	0.480667	0.791723	1	0.0781807	0.0432697	0.498785	0.209772	0.584836	0.209814	0.523001	0.518022	0.311948	0.215483	0.79174	0.358127	1	0.355419	0.920497	0.00763172	0.718975	0.806876	0.699115	1	0.680776	0.336653	0.47639	0.0749015	0.113893	0.887748	0.0237025	0.0929858	0.324142	0.920494	0.0947161	1	0.327268	0.518365	0.709161	0.920496	0.632336	0.777727	0.791734	0.194443
Cyanidin-3-monoglucoside (concentration in mg anthocyanin/kg of berries)	0.764893	0.352725	0.639785	0.920492	0.806965	0.584836	0.920496	0.887748	0.777876	0.0925338	0.841847	0.841822	0.137796	0.689918	0.127047	0.719008	0.699154	0.887774	0.181326	0.321634	0.37567	0.544034	0.584972	0.920518	0.633109	0.752318	0.699179	0.50344	0.432574	0.777777	0.334278	0.287761	0.617914	0.764632	0.823423	0.250166	0.752325	0.740753	0.7407	0.752325	0.480776	0.691814	0.140501	0.862963	0.88777	0.663657	1	0.591134	0.428769
Petunidin-3-monoglucoside (concentration in mg anthocyanin/kg of berries)	1	0.046878	0.157511	0.259833	0.764668	0.366747	0.597522	0.689753	0.625065	0.0772855	0.271552	0.42148	0.197186	0.604195	0.206759	0.752288	0.549469	0.336514	0.190608	0.72957	0.254307	0.887738	0.459569	0.72957	0.0192074	0.55506	1	0.632262	1	0.572533	0.277287	0.443741	0.0439806	0.0739254	0.920488	0.0233958	0.0611869	0.572583	0.920489	0.062289	0.689771	0.441957	0.632521	0.699375	0.639797	0.887753	0.352573	0.578576	0.3848
Peonidin-3-monoglucoside (concentration in mg anthocyanin/kg of berries)	0.0904957	0.503425	0.699132	0.549476	0.791743	0.639785	0.248977	0.00166395	0.920496	0.533346	0.920494	0.920489	0.25442	0.920488	0.277287	0.164751	0.61786	0.476345	0.298337	0.163807	0.293871	0.21372	0.680752	0.378688	0.920526	0.862739	0.624995	0.508198	0.862744	1	0.647478	0.176034	1	0.639749	0.0661435	5.42959e-05	0.791718	0.578589	0.111869	0.777709	0.391121	0.0322646	0.451714	0.2359	1	0.632312	0.887742	0.0919403	0.225779
Malvidin-3-monoglucoside (concentration in mg anthocyanin/kg of berries)	0.51313	0.205129	0.213827	0.170262	0.777715	0.699132	1	0.40416	1	0.150636	0.269364	0.28958	0.432332	0.82338	0.513028	0.215186	0.610906	0.0429967	0.326404	0.489604	0.428661	0.394302	0.0491051	0.777715	0.00844298	0.806865	0.86274	0.680738	0.764625	0.59107	0.699103	0.680752	0.0325302	0.0918168	0.175939	6.25605e-05	0.0583702	0.920484	0.347047	0.0580432	0.597516	0.149028	0.806901	0.0778378	0.221143	1	0.126723	0.610929	0.591041
Delphinidin-3-monoglucoside-acetate (concentration in mg anthocyanin/kg of berries)	1	0.130783	0.752307	0.63977	0.841803	0.639785	0.207961	0.555054	0.806894	0.119832	0.823417	0.432398	0.349902	0.823406	0.355444	0.617849	0.740651	0.305043	0.397646	0.680818	0.432378	0.578576	0.672054	0.823406	0.037085	0.806855	0.296392	0.372607	1	1	1	0.740658	0.319048	0.358094	0.321509	0.093639	0.302704	0.663634	0.358197	0.311897	0.46784	0.920683	0.385337	0.823519	0.862752	0.887756	0.699136	0.443751	1
Cyanidin-3-monoglucoside-acetate (concentration in mg anthocyanin/kg of berries)	*	0.699189	0.476354	0.566622	0.632561	0.52319	0.841791	0.508262	0.611255	0.0414044	0.611106	0.680847	0.355826	0.463878	0.339678	0.54952	0.443856	0.307535	0.418142	1	0.549543	0.663662	0.791846	1	0.741319	0.597577	0.485733	0.224254	0.920498	0.920513	0.344556	0.68988	0.862766	0.887748	0.549619	0.485909	0.887756	0.317069	0.566762	0.9205	0.215483	0.557915	0.0572733	0.490682	0.584891	0.279382	0.689813	0.920497	0.617901
Petunidin-3-monoglucoside-acetate (concentration in mg anthocyanin/kg of berries)	0.639968	0.0547659	0.632289	0.528114	0.672064	0.508221	0.126677	0.543963	0.639808	0.151539	0.54952	0.336502	0.369666	0.680747	0.381731	0.680725	0.597539	0.302729	0.414453	0.610972	0.451501	0.517976	0.610929	0.752311	0.0238521	1	0.302881	0.459542	1	1	0.841767	0.841775	0.252524	0.291678	0.265467	0.0813461	0.236998	0.610941	0.326379	0.243745	0.517991	0.887927	0.59128	0.920525	0.533323	0.841788	0.400881	0.319061	0.777704
Peonidin-3-monoglucoside-acetate (concentration in mg anthocyanin/kg of berries)	0.862803	0.459578	0.455534	0.265481	0.572614	0.66364	0.699119	0.503425	0.6637	0.19712	0.566683	0.920497	0.428836	0.86276	0.40438	0.543976	0.729574	0.190657	0.566629	0.533402	0.920491	0.439913	0.298351	0.887749	0.00146507	0.480667	0.862768	0.729547	0.887745	1	1	0.407642	0.699136	0.920486	0.213827	1.09154e-05	0.777718	0.0534395	0.321577	0.823394	0.0157015	0.842232	0.841891	1	0.591141	0.647533	0.617895	0.168108	0.647478
Delphinidin-3-monoglucoside-p-coumarate (concentration in mg anthocyanin/kg of berries)	0.887888	0.208438	0.503473	0.167152	0.681126	0.764692	0.841834	0.791762	0.920591	0.400957	0.862833	0.618219	0.270149	0.485586	0.308082	0.18695	0.791819	0.394988	0.153833	0.618056	0.920508	0.740713	0.920639	0.841853	0.214562	0.157078	0.719348	0.0448121	0.672069	0.561104	0.397938	0.672375	0.099058	0.135107	0.209994	0.118776	0.10927	0.418509	0.173203	0.109966	0.373011	0.731822	0.75272	0.495766	0.887796	0.729684	0.680824	0.369851	1
Malvidin-3-monoglucoside-acetate (concentration in mg anthocyanin/kg of berries)	0.463831	0.146604	0.680761	0.489562	0.79174	0.498752	0.296023	0.549443	0.689789	0.708868	0.566601	0.238687	0.451501	0.222685	0.485073	0.352517	0.121259	0.136716	0.467831	0.212357	0.841765	0.164751	0.136732	0.302742	0.000276475	0.273207	0.27925	0.680734	0.428708	0.597545	0.269256	1	0.194383	0.240323	0.349806	0.00274087	0.178233	0.61786	0.42867	0.186725	0.708835	0.719348	0.230859	0.279498	0.166949	0.355444	0.138483	0.109809	0.53857
Peonidin-3-monoglucoside-caffeoate (concentration in mg anthocyanin/kg of berries)	0.164327	0.841793	0.436135	0.213843	0.489909	1	0.572575	0.116912	0.447972	0.48071	0.0423423	0.467968	0.149705	0.119434	0.162797	1	0.233941	0.82345	0.191331	0.104792	0.655443	0.0806259	0.887796	0.48526	0.591905	0.518022	0.300976	0.316637	0.680791	0.428859	0.259998	0.0813036	0.862754	0.791732	0.336819	*	0.920493	0.597679	0.52318	0.920494	0.0524534	0.0755069	0.764813	0.486315	0.823428	0.647589	0.887758	0.32401	0.372674
Cyanidin-3-monoglucoside-p-coumarate (concentration in mg anthocyanin/kg of berries)	0.862837	0.118693	0.62499	0.252654	0.597829	0.887767	1	0.29395	0.655678	0.232226	0.451872	0.485329	0.324519	0.189955	0.347751	0.764653	0.319323	0.920526	0.292117	0.155786	0.920497	0.258187	0.320569	0.428962	0.888003	0.222956	0.370001	0.0849688	0.610978	0.604281	0.177498	0.253154	0.245656	0.291781	0.719056	0.303986	0.302823	0.117443	0.729646	0.314367	0.0403945	0.824485	0.92058	0.633019	0.618006	0.366995	0.920501	0.764653	0.39768
Malvidin-3-monoglucoside-caffeoate (concentration in mg anthocyanin/kg of berries)	0.425686	*	*	*	*	*	*	0.538657	0.681273	*	*	*	*	*	*	*	*	*	0.225894	0.101384	0.287694	*	*	0.209946	*	0.171604	0.244972	0.203847	*	*	*	*	*	*	*	*	*	*	*	*	*	*	0.550444	*	*	*	0.578717	0.194592	0.680802
Petunidin-3-monoglucoside-p-coumarate (concentration in mg anthocyanin/kg of berries)	0.777849	0.129207	0.584767	0.191871	0.92052	0.566615	1	0.610917	0.806944	0.572533	0.55519	0.752333	0.336653	0.47646	0.391282	0.267352	0.752349	0.237222	0.168142	0.74067	0.806857	0.920488	0.887774	0.9205	0.243235	0.28753	0.411421	0.0591277	0.597564	0.463809	0.39768	0.777765	0.049418	0.0713888	0.25995	0.170239	0.055788	0.28354	0.249093	0.0571192	0.326455	0.792424	0.597862	0.246619	0.680781	0.777762	0.328914	0.203863	0.432388
Cis-Malvidin-3-monoglucoside-p-coumarate (concentration in mg anthocyanin/kg of berries)	0.887791	1	0.708855	0.528128	0.302975	0.887763	0.417949	0.202428	0.69921	0.566601	0.708936	0.238834	0.597695	1	0.494367	0.0907674	0.672054	0.0361424	0.699194	0.0903315	0.862742	0.178308	0.28133	0.15363	0.611397	0.920488	0.764692	1	0.777727	0.439974	0.777731	0.508315	0.0505735	0.0819081	0.862752	0.099719	0.0570901	0.428848	0.729578	0.0616189	0.0942717	0.656477	0.251283	0.0142546	0.823409	0.45169	0.566615	0.157545	0.663593
Peonidin-3-monoglucoside-p-coumarate (concentration in mg anthocyanin/kg of berries)	0.122283	0.480659	0.920489	0.28749	0.13173	1	0.0929858	0.476303	0.235542	0.920492	0.647515	0.119086	0.381753	0.184347	0.467877	0.617844	0.54949	0.331425	0.339177	0.311974	0.777712	0.366714	0.4215	0.29614	0.324412	0.764619	0.0943249	0.0744259	0.2636	0.227448	0.344405	0.407631	0.238715	0.485057	0.154451	4.17355e-06	0.341724	0.271311	0.210854	0.352539	0.134153	0.0681796	0.887774	0.159092	0.689775	0.862756	1	0.699132	0.862735
Malvidin-3-monoglucoside-p-coumarate (concentration in mg anthocyanin/kg of berries)	1	1	0.544042	0.752297	0.584767	0.610929	0.173621	0.517962	0.887746	0.447671	0.920488	0.708839	0.347036	0.862732	0.432332	0.0320205	0.680725	0.0302598	0.125171	0.428748	0.72954	0.275163	0.115382	0.289605	0.175199	0.740655	0.729555	0.624973	0.862742	0.708847	0.862732	1	0.00823084	0.0194862	0.304966	0.00191333	0.00990266	0.40417	0.341691	0.0104535	0.610895	0.159313	0.124642	0.00294858	0.304941	0.791743	0.118279	0.053903	0.447541
Total skin anthocyanin concentration (concentration in mg anthocyanin/kg of berries)	0.508384	0.218154	0.296113	0.205186	0.791743	0.533323	0.887736	0.38479	0.920498	0.163807	0.326538	0.584755	0.184347	0.823394	0.212341	0.443677	0.523024	0.145727	0.138499	0.920493	0.34708	0.887736	0.215215	0.791734	0.0150032	0.887739	0.920493	0.639759	0.823392	0.591088	0.572513	0.417959	0.0354185	0.0935236	0.2438	6.29301e-05	0.0604728	0.823399	0.349841	0.0615612	0.467814	0.12949	0.887787	0.14724	0.538612	0.841786	0.314261	0.708855	0.472019
Sum of monoglucosides (concentration in mg anthocyanin/kg of berries)	0.463809	0.212238	0.221261	0.237053	0.887745	0.555074	1	0.263519	0.920494	0.114074	0.24914	0.41791	0.203802	0.752297	0.228967	0.663569	0.55506	0.237039	0.184315	0.823399	0.257935	1	0.275189	0.617866	0.0240969	0.823389	0.887742	0.777709	0.777718	0.566581	0.480659	0.369677	0.0570479	0.139275	0.344405	0.000234352	0.100028	0.591082	0.503425	0.101278	0.5725	0.141546	0.663713	0.27359	0.604147	0.791743	0.41098	1	0.300439
Sum of acetate derivatives (concentration in mg anthocyanin/kg of berries)	0.597687	0.120456	0.680761	0.503432	0.823401	0.503448	0.24895	0.485049	0.740658	0.378711	0.544019	0.283279	0.333915	0.455498	0.349806	0.421442	0.316624	0.143872	0.387969	0.349877	0.639754	0.283279	0.249005	0.528136	0.0010791	0.533309	0.321522	0.841767	0.729558	0.80686	0.566562	0.841773	0.202399	0.257909	0.291728	0.00377662	0.189218	0.451527	0.372607	0.198328	0.414423	0.887888	0.740732	0.591226	0.360962	0.625019	0.291741	0.16698	0.617833
Sum of coumarate derivatives (concentration in mg anthocyanin/kg of berries)	0.823423	0.823378	0.806871	0.447584	0.425096	0.708851	0.238673	0.624947	0.823401	0.806873	0.920489	0.572494	0.245439	0.572488	0.309532	0.0637868	1	0.0551135	0.0959101	0.862748	0.920483	0.663569	0.213735	0.632272	0.154872	0.862742	0.467858	0.222699	0.639775	0.494129	0.597516	0.764625	0.0117072	0.0293789	0.215186	0.000888401	0.01583	0.285356	0.25428	0.0167253	0.341713	0.174771	0.252821	0.0124335	0.528099	1	0.228953	0.0947635	0.517955
Sum of caffeoate derivatives (concentration in mg anthocyanin/kg of berries)	0.214391	0.862764	0.86275	0.394431	0.632551	*	0.401003	0.190592	0.92053	0.752318	0.181352	0.647596	0.272241	0.887778	0.305974	0.221376	0.508325	0.227991	0.109924	0.494237	0.256247	0.560824	0.273848	0.513204	0.325986	0.133389	0.591309	0.480675	0.263752	0.421656	0.578668	0.841837	1	1	0.314585	*	0.823406	0.663713	0.533485	0.806876	0.296227	0.0396031	0.690055	0.0730907	0.887768	0.729651	0.680791	0.485132	1
Sum of delphinidin derivatives (concentration in mg anthocyanin/kg of berries)	0.655772	0.0860661	0.17256	0.201127	0.823463	0.708868	0.476336	0.841773	1	0.0718915	0.0581464	0.572598	0.193762	0.611057	0.195086	0.455534	0.503498	0.302837	0.189737	0.823406	0.425096	1	0.375807	1	0.00752462	0.729558	0.729626	0.624962	1	0.764664	0.381914	0.498848	0.0814797	0.119735	0.708895	0.0235814	0.0976678	0.401163	0.740691	0.100105	0.887751	0.351437	0.561182	0.672498	1	0.625058	0.729582	0.729574	0.232226
Sum of cyanidin derivatives (concentration in mg anthocyanin/kg of berries)	0.778087	0.300859	0.672044	0.823409	0.841904	0.591218	0.920505	1	0.807073	0.0698561	0.887813	1	0.146539	0.823511	0.137651	0.777769	0.791766	0.887801	0.180487	0.287869	0.451614	0.57866	0.518534	0.920531	0.656416	0.719022	0.689905	0.42149	0.476561	0.752413	0.485405	0.285875	0.647557	0.77774	1	0.254195	0.777758	1	0.92052	0.777758	0.35557	0.742909	0.15797	0.920662	0.887785	0.572638	1	0.663657	0.560855
Sum of petunidin derivatives (concentration in mg anthocyanin/kg of berries)	1	0.0384247	0.174845	0.212326	0.806914	0.375647	0.578563	0.791723	0.625123	0.0776981	0.358466	0.523071	0.192136	0.647551	0.201413	0.655407	0.523039	0.300528	0.164931	0.77774	0.309581	1	0.480737	0.862758	0.0173916	0.572507	0.887754	0.517984	1	0.663629	0.352698	0.49418	0.045549	0.0739396	0.719004	0.024066	0.060147	0.729622	0.823409	0.0608709	0.617889	0.483228	0.709089	0.625425	0.597604	0.862764	0.305056	0.489595	0.503448
Sum of peonidin derivatives (concentration in mg anthocyanin/kg of berries)	0.0807185	0.517984	0.729562	0.443713	0.610959	0.672039	0.210824	0.00495649	0.752329	0.538634	0.887751	0.708855	0.252624	0.887743	0.281344	0.279197	0.729555	0.699132	0.285462	0.179589	0.339117	0.235391	0.862744	0.349865	0.719123	0.920486	0.480719	0.375603	0.729562	0.791732	0.823389	0.179572	0.806852	0.76461	0.0598536	7.02445e-06	0.920484	0.841777	0.100753	0.920485	0.269295	0.0301172	0.528283	0.198918	1	0.672059	0.920488	0.184347	0.319
Sum of malvidin derivatives (concentration in mg anthocyanin/kg of berries)	0.663645	0.263506	0.400923	0.209409	0.729562	0.617866	0.76461	0.647453	0.920493	0.339215	0.425127	0.447566	0.366693	0.806847	0.447566	0.109069	0.517991	0.0222814	0.218198	0.394386	0.58473	0.289555	0.0370866	0.887742	0.00602704	0.699132	0.920489	0.823387	0.887742	0.63977	0.71896	0.777718	0.0147663	0.0452229	0.153409	2.05558e-05	0.0245745	0.887738	0.275163	0.0247216	0.560748	0.130846	0.485271	0.022728	0.18305	0.862752	0.0829149	0.307287	0.862732
Skin colour OIV 225 (SC)	*	*	0.841784	0.321563	1	0.672194	0.480737	*	*	0.806873	*	*	*	*	*	*	*	0.120784	1	*	*	*	*	*	0.0594275	*	*	*	0.436197	*	*	0.476429	0.0385058	0.0615451	0.0822828	0.0768838	0.038724	*	*	0.0368069	*	*	*	1	*	0.0698881	*	*	*
Pulp colour (PC)	0.0005222	0.363785	0.0902815	0.0776188	0.0262131	0.122069	0.283267	0.0342133	0.0254721	0.0568322	0.000740541	0.777709	0.323871	0.083874	0.363816	0.663569	0.197012	0.14952	0.391142	0.143037	0.494089	0.212238	0.095311	0.235434	1	0.791726	0.0705914	0.203787	0.100121	0.0447844	0.240349	0.216708	0.261654	0.160468	0.175954	3.6604e-09	0.314201	0.841765	0.250716	0.318988	0.152392	0.000148923	0.451625	0.006333	0.467797	0.841784	0.494113	0.189308	0.0874812
Skin and pulp colour (SPC')	0.432772	0.32651	0.432398	0.113988	0.407761	0.887753	0.764622	0.436165	0.823478	0.316675	0.105814	0.823431	0.777871	0.92051	0.791871	0.116222	0.7089	0.0527264	0.632355	1	0.887751	0.887749	0.030425	0.555217	0.0708214	0.740666	0.719117	0.777715	0.183143	0.205417	0.584829	0.777731	0.0195844	0.0270687	0.0319561	0.000420899	0.0215974	0.0475239	0.0790193	0.0209066	0.625019	0.259197	0.464188	0.385574	0.366908	0.0707763	0.397692	0.591141	0.51803
Skin and pulp colour (SPC)	0.0117676	0.699107	0.202474	0.101324	0.0458672	0.157495	0.517969	0.142909	0.102013	0.131695	0.00185635	0.823385	0.439875	0.205172	0.472053	0.366693	0.549469	0.112533	0.263586	0.152519	0.74063	0.16156	0.0541879	0.218213	0.369953	0.777715	0.170325	0.212266	0.060559	0.038398	0.168014	0.560781	0.00659829	0.00329211	0.0485415	8.84116e-08	0.0072053	0.358127	0.0952954	0.00717297	0.777706	0.00179828	0.63985	0.0321878	0.647473	0.206691	0.584755	0.156462	0.171323
* These tests stopped because of infinite likelihood or too many likelihood evaluations because of a non-positive definite matrix.
[truncated: 75 more columns]
