# Supplementary material for: A Candidate-Gene Association Study for Berry Colour and Anthocyanin Content in Vitis vinifera L
Source: PLoS One. 2012 Sep 28;7(9):e46021. doi: 10.1371/journal.pone.0046021 (PMC3461038; doi:10.1371/journal.pone.0046021)
Supplement: Table S5 — a. Percentage of phenotypes showing significant associations (P<0.01) with each SNP. b. Percentage of SNPs and phenotypes showing significant associations (P<0.01) for each gene. (XLS) [file pone.0046021.s005.xls]

## Sheet: S5a
Supporting Table S5a. Percentage of phenotypes showing significant associations (P < 0.01) for each SNP.
				Percentage of phenotypes significantly associated under Model A		Percentage of phenotypes significantly associated under Model B
Gene	SNP ID	MAF
MYB11	s77	0.27		1.63934		0
	s78	0.44		1.63934		1.63934
	s79	0.13		1.63934		1.63934
	s80	0.4		11.4754		14.7541
	s81	0.38		11.4754		9.83607
	s82	0.34		1.63934		1.63934
	s83	0.38		6.55738		1.63934
	s84	0.49		4.91803		13.1148
	s85	0.4		3.27869		0
	s86	0.4		0		4.91803
	s87	0.07		21.3115		18.0328
	s88	0.36		0		0
	s89	0.33		24.5902		11.4754
	s90	0.06		27.8689		21.3115
	s91	0.33		0		0
	s92	0.06		13.1148		13.1148
	s93	0.07		9.83607		14.7541
	s94	0.35		16.3934		4.91803
MYBCC	s62	0.37		1.63934		0
	s63	0.36		3.27869		1.63934
	s64	0.04		4.91803		4.91803
	s65	0.21		13.1148		0
	s66	0.15		4.91803		0
	s67	0.13		0		0
	s68	0.06		19.6721		18.0328
	s69	0.36		3.27869		1.63934
	s70	0.22		0		0
	s71	0.48		4.91803		0
	s72	0.35		3.27869		1.63934
	s73	0.15		1.63934		0
MYCB	s32	0.06		0		0
	s33	0.32		8.19672		6.55738
	s34	0.32		9.83607		4.91803
	s35	0.2		1.63934		0
	s36	0.15		32.7869		31.1475
	s37	0.31		9.83607		8.19672
	s38	0.08		0		0
	s39	0.2		1.63934		0
	s40	0.31		9.83607		6.55738
	s41	0.17		3.27869		0
UFGT	s13	0.11		0		0
	s14	0.23		0		0
	s15	0.1		0		0
	s16	0.3		4.91803		0
	s17	0.2		0		0
	s18	0.2		3.27869		0
	s19	0.1		0		0
	s20	0.31		4.91803		0
	s21	0.09		0		0
	s22	0.32		6.55738		1.63934
	s23	0.16		1.63934		0
	s24	0.33		1.63934		0
	s25	0.06		24.5902		26.2295
	s26	0.37		0		0
	s27	0.34		1.63934		0
	s28	0.25		1.63934		0
	s29	0.34		1.63934		0
	s30	0.37		3.27869		0
	s31	0.21		0		0
MRP	s95	0.26		16.3934		4.91803
	s96	0.33		1.63934		1.63934
	s97	0.18		13.1148		11.4754
	s98	0.42		9.83607		3.27869
	s99	0.06		0		0
	s100	0.3		14.7541		0
	s101	0.2		0		0
	s102	0.31		18.0328		0
	s103	0.49		3.27869		1.63934
	s104	0.1		0		0
	s105	0.03		0		0
	s106	0.1		9.83607		4.91803
	s107	0.21		0		0
	s108	0.22		0		0
CHI	s74	0.027027		4.91803		1.63934
	s75	0.438776		8.19672		1.63934
	s76	0.0486111		3.27869		3.27869
LDOX	s42	0.190476		9.83607		3.27869
	s43	0.312925		0		0
	s44	0.277397		3.27869		3.27869
GST	s59	0.14726		3.27869		0
	s60	0.231034		1.63934		1.63934
	s61	0.244828		1.63934		1.63934
DFR	s1	0.328571		4.91803		1.63934
	s2	0.192568		0		0
	s3	0.407801		1.63934		0
	s4	0.475694		0		0
	s5	0.262069		0		0
	s6	0.316901		0		0
	s7	0.234694		0		0
	s8	0.0608108		3.27869		3.27869
	s9	0.255102		0		0
	s10	0.396429		3.27869		6.55738
	s11	0.0342466		3.27869		3.27869
	s12	0.126712		1.63934		1.63934
MYCA	s53	0.152027		0		0
	s54	0.269231		0		1.63934
	s55	0.256757		1.63934		1.63934
	s56	0.0675676		6.55738		6.55738
	s57	0.375862		0		0
	s58	0.266892		1.63934		1.63934
CHSA	s48	0.426056		0		0
	s49	0.221477		6.55738		0
	s50	0.110738		0		0
	s51	0.33813		0		0
	s52	0.459459		3.27869		1.63934
F3H	s113	0.314189		0		0
	s114	0.222603		4.91803		9.83607
	s115	0.368243		1.63934		3.27869
	s116	0.353741		0		1.63934
	s117	0.192857		0		0
CHSC	s118	0.325503		0		0
	s119	0.375839		0		0
	s120	0.0671141		0		1.63934
	s121	0.0304054		0		0
	s122	0.0302013		0		0
	s123	0.175676		8.19672		4.91803
	s124	0.383562		0		0
MYB9	s109	0.166667		0		0
	s110	0.0816327		1.63934		0
	s111	0.322148		0		0
	s112	0.260274		0		0
F3'HB	s45	0.391156		0		0
	s46	0.336957		0		0
	s47	0.413194		0		0

## Sheet: S5b
Supporting Table S5b. Percentage of SNPs and phenotypes showing significant associations (P < 0.01) for each gene.
		Model A		Model B
Genes		Percentage of SNPs associated with at least one phenotype	Percentage of phenotypes associated with at least one SNP	Percentage of SNPs associated with at least one phenotype	Percentage of phenotypes associated with at least one SNP
Trancription factors	MYCA	50	8.2	66.67	9.84
	MYCB	80	44.26	50	36.07
	MYB9	25	1.64	0	0
	MYB11	83.33	52.46	77.78	44.26
	MYBCC	83.33	27.87	41.67	24.59
Biosynthethic pathway of anthocyanins	CHSA	40	9.84	20	1.64
	CHSC	14.29	8.2	28.57	6.56
	CHI	100	14.75	100	4.92
	F3H	40	6.56	60	11.48
	F3’HB	0	0	0	0
	DFR	50	13.11	41.67	14.75
	LDOX	66.67	9.84	66.67	4.92
	UFGT	57.89	34.43	10.53	27.87
Vacuole accumulation	MRP	57.14	39.34	42.86	18.03
	GST	100	4.92	66.67	1.64
For the percentage of phenotypes showing significant associations (P < 0.01) for each SNP see Table S4b.
