# Supplementary material for: A Candidate-Gene Association Study for Berry Colour and Anthocyanin Content in Vitis vinifera L
Source: PLoS One. 2012 Sep 28;7(9):e46021. doi: 10.1371/journal.pone.0046021 (PMC3461038; doi:10.1371/journal.pone.0046021)
Supplement: Table S7 — Pairwise LD values estimated between SNPs within each gene. (XLS) [file pone.0046021.s007.xls]

## Sheet: Sheet1
Supporting Table S7. Pairwise LD estimated between SNPs within each gene.
DFR
SNP 1	SNP 2	D'	Chi-square
s1	s2	1	16.68
s1	s3	1	42.74
s1	s4	1	57.08
s1	s5	1	101.72
s1	s6	0.703551	66.33
s1	s7	1	21.26
s1	s8	1	19.65
s1	s9	1	100.42
s1	s10	1	42.87
s1	s11	1	11.08
s1	s12	1	42.43
s2	s3	1	23.5
s2	s4	1	30.87
s2	s5	1	12.24
s2	s6	1	16.11
s2	s7	0.924256	93.54
s2	s8	0.858756	1.7
s2	s9	1	12.02
s2	s10	1	22.96
s2	s11	1	1.27
s2	s12	1	5.03
s3	s4	1	106.31
s3	s5	1	33.91
s3	s6	1	46.1
s3	s7	1	30.68
s3	s8	1	5.74
s3	s9	1	32.52
s3	s10	1	137
s3	s11	1	3.61
s3	s12	1	13.39
s4	s5	1	46.84
s4	s6	0.61766	24.24
s4	s7	0.543265	11.72
s4	s8	1	7.58
s4	s9	1	45.14
s4	s10	1	106.71
s4	s11	1	4.76
s4	s12	1	18.88
s5	s6	1	103.13
s5	s7	1	16.14
s5	s8	1	3.24
s5	s9	1	143
s5	s10	1	33.64
s5	s11	1	15.26
s5	s12	1	61.02
s6	s7	0.0284218	0.02
s6	s8	1	3.98
s6	s9	1	101.56
s6	s10	1	45.6
s6	s11	1	9.35
s6	s12	1	44.73
s7	s8	1	2.97
s7	s9	1	15.79
s7	s10	1	29.9
s7	s11	0.999999	1.6
s7	s12	1	6.69
s8	s9	1	3.31
s8	s10	1	5.47
s8	s11	0.434701	0.06
s8	s12	1	1.4
s9	s10	1	32.27
s9	s11	1	15.83
s9	s12	1	61.18
s10	s11	1	3.48
s10	s12	1	13.66
s11	s12	1	0.75
UFGT
SNP 1	SNP 2	D'	Chi-square
s13	s14	1	5.5
s13	s15	1	148
s13	s16	1	7.28
s13	s17	1	4.44
s13	s18	0.999997	4.43
s13	s19	1	132.11
s13	s20	1	7.68
s13	s21	0.304987	0.16
s13	s22	1	8.27
s13	s23	0.999998	3.51
s13	s24	1	8.65
s13	s25	1	1.08
s13	s26	1	29.82
s13	s27	1	9.36
s13	s28	1	5.63
s13	s29	1	8.56
s13	s30	1	10.12
s13	s31	1	4.49
s14	s15	1	5.26
s14	s16	1	18.95
s14	s17	1	120.62
s14	s18	1	11.13
s14	s19	1	5.13
s14	s20	1	20.21
s14	s21	0.999998	4.46
s14	s22	1	21.93
s14	s23	1	8.02
s14	s24	0.805729	52.73
s14	s25	0.260886	0.18
s14	s26	1	25.92
s14	s27	1	85.1
s14	s28	1	15.23
s14	s29	0.803024	50.08
s14	s30	1	73.51
s14	s31	0.932948	107.96
s15	s16	1	7.28
s15	s17	1	4.32
s15	s18	0.966303	4.03
s15	s19	1	130.83
s15	s20	1	7.49
s15	s21	0.245438	0.1
s15	s22	1	8.06
s15	s23	0.999922	3.42
s15	s24	1	8.65
s15	s25	1	1.05
s15	s26	1	28.89
s15	s27	1	9
s15	s28	1	5.63
s15	s29	1	8.56
s15	s30	1	9.72
s15	s31	1	4.37
s16	s17	1	15.95
s16	s18	0.944912	76.42
s16	s19	1	6.59
s16	s20	0.838709	17.25
s16	s21	1	33.87
s16	s22	0.80741	19.41
s16	s23	1	64.25
s16	s24	0.173552	3.72
s16	s25	1	21.37
s16	s26	0.575667	12.01
s16	s27	0.0365875	0.04
s16	s28	0.671116	9.11
s16	s29	0.00239528	0
s16	s30	0.0621329	0.14
s16	s31	1	16.36
s17	s18	1	9.25
s17	s19	1	4.11
s17	s20	1	16.34
s17	s21	0.879735	2.88
s17	s22	1	17.86
s17	s23	1	6.92
s17	s24	1	68.33
s17	s25	0.0368043	0.05
s17	s26	1	20.74
s17	s27	1	69.94
s17	s28	1	12.54
s17	s29	1	65.14
s17	s30	1	62.13
s17	s31	0.957429	131.07
s18	s19	0.999999	4.23
s18	s20	1	16.68
s18	s21	1	3.56
s18	s22	1	17.81
s18	s23	1	106.94
s18	s24	0.377158	2.48
s18	s25	1	36.01
s18	s26	0.566801	7.1
s18	s27	0.90245	15.16
s18	s28	0.540446	3.42
s18	s29	0.888538	14.46
s18	s30	0.905965	17.28
s18	s31	1	9.36
s19	s20	1	7.1
s19	s21	0.999991	1.5
s19	s22	1	7.53
s19	s23	0.999999	3.24
s19	s24	1	7.88
s19	s25	1	1.05
s19	s26	0.92029	23.11
s19	s27	1	8.57
s19	s28	1	5.13
s19	s29	1	7.82
s19	s30	1	9.28
s19	s31	0.760708	2.48
s20	s21	1	4.36
s20	s22	0.982245	125.56
s20	s23	1	12.79
s20	s24	0.9529	26.63
s20	s25	1	4.17
s20	s26	0.624153	36.58
s20	s27	1	30.09
s20	s28	0.862553	74.87
s20	s29	0.906381	24.87
s20	s30	1	33.51
s20	s31	0.911067	14.16
s21	s22	1	6.74
s21	s23	1	2.84
s21	s24	1	29.1
s21	s25	0.856529	0.66
s21	s26	1	8.27
s21	s27	1	27.28
s21	s28	1	4.9
s21	s29	1	28.36
s21	s30	1	24.4
s21	s31	0.999999	3.69
s22	s23	1	13.36
s22	s24	1	35.82
s22	s25	1	4.21
s22	s26	0.564126	35.65
s22	s27	1	36.53
s22	s28	0.838093	67.75
s22	s29	0.95622	33.22
s22	s30	1	40.52
s22	s31	0.831912	12.67
s23	s24	1	13.28
s23	s25	1	46.78
s23	s26	1	16.9
s23	s27	1	14.1
s23	s28	1	8.87
s23	s29	1	13.66
s23	s30	1	15.86
s23	s31	1	7
s24	s25	0.999997	4.43
s24	s26	0.792302	27.07
s24	s27	0.884304	108.52
s24	s28	0.802823	15.92
s24	s29	0.915727	112.85
s24	s30	0.894422	99.55
s24	s31	0.937071	60.93
s25	s26	1	5.43
s25	s27	0.999999	4.54
s25	s28	1	3.16
s25	s29	0.906912	3.53
s25	s30	1	5.2
s25	s31	0.0293186	0.03
s26	s27	1	43.21
s26	s28	1	74.2
s26	s29	0.921261	36.57
s26	s30	1	48.88
s26	s31	0.92757	18.55
s27	s28	1	24.86
s27	s29	0.866984	103.57
s27	s30	1	126.47
s27	s31	0.93975	62.14
s28	s29	1	25.63
s28	s30	1	28
s28	s31	1	13.14
s29	s30	0.966114	118.99
s29	s31	1	64.7
s30	s31	0.935488	55.23
MYCB
SNP 1	SNP 2	D'	Chi-square
s32	s33	1	4.41
s32	s34	1	4.46
s32	s35	0.742519	1.21
s32	s36	0.566555	0.51
s32	s37	1	4.24
s32	s38	1	0.89
s32	s39	0.570341	0.8
s32	s40	1	4.22
s32	s41	1	47.24
s33	s34	0.968077	135.62
s33	s35	1	16.25
s33	s36	1	11.95
s33	s37	1	142.42
s33	s38	0.999999	6.05
s33	s39	1	17.08
s33	s40	1	141.41
s33	s41	0.726985	7.54
s34	s35	1	17.11
s34	s36	0.340237	1.4
s34	s37	1	142.19
s34	s38	0.999999	6.11
s34	s39	1	17.95
s34	s40	1	141.18
s34	s41	1	14.4
s35	s36	1	6.16
s35	s37	1	16.31
s35	s38	1	3.27
s35	s39	0.978208	135.81
s35	s40	1	16.24
s35	s41	0.697157	3.58
s36	s37	1	11.49
s36	s38	1	2.3
s36	s39	1	6.51
s36	s40	1	11.43
s36	s41	1	5.05
s37	s38	0.999996	5.83
s37	s39	1	17.13
s37	s40	1	148
s37	s41	1	13.74
s38	s39	1	3.36
s38	s40	0.999999	5.53
s38	s41	1	63.21
s39	s40	1	17.05
s39	s41	1	7.92
s40	s41	1	13.35
LDOX
SNP 1	SNP 2	D'	Chi-square
s42	s43	1	15.62
s42	s44	0.805319	57.61
s43	s44	1	24.79
F3'HB
SNP 1	SNP 2	D'	Chi-square
s45	s46	1	47.89
s45	s47	1	125.43
s46	s47	1	52.48
CHSA
SNP 1	SNP 2	D'	Chi-square
s48	s49	0.0005688	0
s48	s50	1	13.86
s48	s51	1	52.84
s48	s52	1	95.94
s49	s50	1	65.22
s49	s51	1	21.67
s49	s52	0.110186	0.61
s50	s51	1	9.24
s50	s52	1	21.85
s51	s52	1	84.72
MYCA
SNP 1	SNP 2	D'	Chi-square
s53	s54	1	9.88
s53	s55	1	9.26
s53	s56	1	1.94
s53	s57	1	43.28
s53	s58	1	9.76
s54	s55	1	105.86
s54	s56	1	4.04
s54	s57	1	34.92
s54	s58	1	112.84
s55	s56	1	3.74
s55	s57	1	30.88
s55	s58	1	139.41
s56	s57	1	15.93
s56	s58	1	3.94
s57	s58	1	32.57
GST
SNP 1	SNP 2	D'	Chi-square
s59	s60	1	7.74
s59	s61	1	8.29
s60	s61	1	139.27
MYBCC
SNP 1	SNP 2	D'	Chi-square
s62	s63	1	138
s62	s64	1	4.06
s62	s65	1	19.53
s62	s66	1	14.94
s62	s67	1	11.86
s62	s68	1	4.76
s62	s69	1	138
s62	s70	1	22.3
s62	s71	1	71.47
s62	s72	1	136
s62	s73	1	13.08
s63	s64	1	3.85
s63	s65	1	20.45
s63	s66	1	14.89
s63	s67	1	11.92
s63	s68	1	5.03
s63	s69	1	146
s63	s70	1	22.38
s63	s71	1	73.76
s63	s72	1	144
s63	s73	1	13.53
s64	s65	1	1.7
s64	s66	1	36.76
s64	s67	1	1.02
s64	s68	0.798968	0.27
s64	s69	1	3.86
s64	s70	1	24.12
s64	s71	1	7.51
s64	s72	1	3.83
s64	s73	1	1.13
s65	s66	1	6.89
s65	s67	1	85.37
s65	s68	1	35.87
s65	s69	1	21.61
s65	s70	0.0173538	0.03
s65	s71	0.272749	2.5
s65	s72	1	21.5
s65	s73	1	97.53
s66	s67	1	3.68
s66	s68	1	1.7
s66	s69	1	14.8
s66	s70	1	89.5
s66	s71	1	29.33
s66	s72	1	13.95
s66	s73	1	4.43
s67	s68	1	1.45
s67	s69	1	11.96
s67	s70	1	5.26
s67	s71	1	19.22
s67	s72	1	11.88
s67	s73	1	133.63
s68	s69	1	5.33
s68	s70	1	26.74
s68	s71	1	9.96
s68	s72	1	5.29
s68	s73	1	1.7
s69	s70	1	22.38
s69	s71	1	74.48
s69	s72	1	147
s69	s73	1	14.21
s70	s71	0.87279	31.05
s70	s72	1	21.33
s70	s73	1	5.62
s71	s72	1	72.74
s71	s73	1	22.29
s72	s73	1	14.16
CHI
SNP 1	SNP 2	D'	Chi-square
s74	s75	1	3.21
s74	s76	0.729199	42.82
s75	s76	0.209199	0.25
MYB11
SNP 1	SNP 2	D'	Chi-square
s77	s78	1	40.2
s77	s79	0.322598	5.92
s77	s80	0.536067	10
s77	s81	1	32.67
s77	s82	1	26.98
s77	s83	0.94219	28.71
s77	s84	0.131745	0.88
s77	s85	1	35.28
s77	s86	0.887069	26
s77	s87	1	26.78
s77	s88	1	28.72
s77	s89	0.393617	3.98
s77	s90	0.885154	18.85
s77	s91	0.732893	13.4
s77	s92	1	25.19
s77	s93	1	28.12
s77	s94	0.23933	1.55
s78	s79	0.166447	0.45
s78	s80	0.716447	37.31
s78	s81	0.982576	109.91
s78	s82	0.596689	19.98
s78	s83	0.964833	104.73
s78	s84	0.767274	67.01
s78	s85	0.934279	107.12
s78	s86	0.864749	91.62
s78	s87	1	7.43
s78	s88	0.941681	89.94
s78	s89	1	53.49
s78	s90	0.678612	3.15
s78	s91	0.740221	29.31
s78	s92	1	7.18
s78	s93	1	8
s78	s94	1	57.23
s79	s80	0.941022	28.6
s79	s81	1	13.62
s79	s82	0.217063	2
s79	s83	0.876282	10.36
s79	s84	0.907087	16.48
s79	s85	0.551128	4.16
s79	s86	0.714145	7.25
s79	s87	1	72.29
s79	s88	1	11.55
s79	s89	0.27137	3.19
s79	s90	0.928057	57.69
s79	s91	0.31769	1
s79	s92	1	69.91
s79	s93	1	77.29
s79	s94	0.301492	3.52
s80	s81	1	63.29
s80	s82	0.946684	101.55
s80	s83	1	62.23
s80	s84	0.94141	83.54
s80	s85	0.808913	42.17
s80	s86	0.860184	47.43
s80	s87	1	15.56
s80	s88	0.901802	43.4
s80	s89	1	110.63
s80	s90	0.856745	10.01
s80	s91	0.844817	74.2
s80	s92	0.864999	11.08
s80	s93	0.884946	13.12
s80	s94	0.896056	95.38
s81	s82	0.927198	41.29
s81	s83	0.970298	134.46
s81	s84	0.921681	82.65
s81	s85	0.937472	118.49
s81	s86	0.932147	107.69
s81	s87	1	6.68
s81	s88	0.949957	114.39
s81	s89	1	46.6
s81	s90	1	5.34
s81	s91	0.888475	34.51
s81	s92	1	6.09
s81	s93	1	7.06
s81	s94	1	48.83
s82	s83	1	47.33
s82	s84	0.950131	64.58
s82	s85	0.790929	30.87
s82	s86	0.929047	42.03
s82	s87	1	5.62
s82	s88	0.916557	34.68
s82	s89	0.690802	69.57
s82	s90	1	4.71
s82	s91	0.882305	104.52
s82	s92	1	4.82
s82	s93	1	5.79
s82	s94	0.66694	58.4
s83	s84	1	96.47
s83	s85	0.984461	128.82
s83	s86	0.983164	118.12
s83	s87	1	6.51
s83	s88	0.951345	119.15
s83	s89	1	45.93
s83	s90	0.628895	2.2
s83	s91	0.925415	36.88
s83	s92	0.735403	3.31
s83	s93	0.764985	4.1
s83	s94	0.965099	44.79
s84	s85	0.924849	86.55
s84	s86	0.847005	74.38
s84	s87	1	10.02
s84	s88	1	83.27
s84	s89	1	70.68
s84	s90	0.802731	5.58
s84	s91	0.948267	60.45
s84	s92	0.826195	6.46
s84	s93	0.84793	7.7
s84	s94	0.976573	71.49
s85	s86	0.936159	115.56
s85	s87	1	7.02
s85	s88	1	118.49
s85	s89	1	49.34
s85	s90	0.693061	3
s85	s91	0.793181	29.1
s85	s92	1	6.62
s85	s93	1	7.55
s85	s94	1	53.31
s86	s87	1	6.66
s86	s88	1	108.3
s86	s89	1	47.93
s86	s90	0.679399	2.81
s86	s91	0.929556	40.72
s86	s92	1	6.56
s86	s93	1	7.18
s86	s94	0.867359	39.06
s87	s88	1	5.39
s87	s89	1	20.93
s87	s90	0.937164	123.84
s87	s91	1	4.73
s87	s92	1	134.55
s87	s93	1	139.49
s87	s94	1	19.19
s88	s89	1	39.37
s88	s90	1	4.84
s88	s91	1	39.26
s88	s92	1	5.17
s88	s93	1	5.71
s88	s94	1	42.54
s89	s90	0.886563	14.51
s89	s91	0.714056	71.76
s89	s92	0.893604	16.07
s89	s93	0.908248	18.55
s89	s94	1	131.29
s90	s91	1	4.15
s90	s92	0.929291	120.9
s90	s93	0.937224	125.61
s90	s94	0.882532	13.65
s91	s92	1	4.29
s91	s93	1	4.9
s91	s94	0.694733	60.88
s92	s93	1	145
s92	s94	1	18.44
s93	s94	1	20.65
MRP
SNP 1	SNP 2	D'	Chi-square
s95	s96	1	95.59
s95	s97	1	11.53
s95	s98	1	69.87
s95	s99	0.746495	1.75
s95	s100	1	21.89
s95	s101	1	12.87
s95	s102	0.867756	17.02
s95	s103	1	51.33
s95	s104	1	5.85
s95	s105	1	1.82
s95	s106	1	5.68
s95	s107	1	13.34
s95	s108	1	13.28
s96	s97	1	15.45
s96	s98	1	82.5
s96	s99	1	17.16
s96	s100	1	29.77
s96	s101	1	17.96
s96	s102	0.902411	25.08
s96	s103	0.974788	67.37
s96	s104	1	8.1
s96	s105	1	2.57
s96	s106	1	8.1
s96	s107	1	18.9
s96	s108	1	19.06
s97	s98	1	23.75
s97	s99	1	2.17
s97	s100	1	79.2
s97	s101	0.301635	11.97
s97	s102	1	76.71
s97	s103	1	31.15
s97	s104	1	3.78
s97	s105	1	23.19
s97	s106	0.860265	53.32
s97	s107	0.285848	9.8
s97	s108	0.29753	10.29
s98	s99	1	7.19
s98	s100	1	42.35
s98	s101	1	24.45
s98	s102	0.925262	37.54
s98	s103	0.981476	98.38
s98	s104	1	9.88
s98	s105	1	3.79
s98	s106	1	11.65
s98	s107	1	25.76
s98	s108	1	23.79
s99	s100	1	4.08
s99	s101	1	2.36
s99	s102	1	4.21
s99	s103	1	8.83
s99	s104	0.999997	1.05
s99	s105	1	0.34
s99	s106	1	1
s99	s107	1	2.6
s99	s108	1	2.49
s100	s101	1	87.38
s100	s102	0.983654	139.65
s100	s103	0.969955	56.25
s100	s104	1	39.33
s100	s105	1	12.23
s100	s106	1	37.59
s100	s107	0.921717	76.6
s100	s108	0.868742	69.01
s101	s102	0.972126	79.92
s101	s103	0.947707	31.77
s101	s104	1	67.33
s101	s105	1	21.06
s101	s106	1	59.07
s101	s107	1	133.01
s101	s108	1	123.28
s102	s103	0.940777	54.67
s102	s104	1	38.05
s102	s105	1	11.84
s102	s106	1	36.39
s102	s107	0.892757	69.52
s102	s108	0.838084	62.06
s103	s104	1	16.07
s103	s105	1	4.97
s103	s106	1	15.47
s103	s107	0.850493	26.68
s103	s108	0.851394	26.22
s104	s105	1	0.6
s104	s106	0.924042	1.61
s104	s107	1	58.82
s104	s108	1	52.79
s105	s106	1	46.61
s105	s107	1	17.14
s105	s108	1	18.84
s106	s107	1	55.85
s106	s108	1	56.09
s107	s108	1	130.17
MYB9
SNP 1	SNP 2	D'	Chi-square
s109	s110	0.762382	1.54
s109	s111	1	13.95
s109	s112	1	10.25
s110	s111	1	27.8
s110	s112	1	4.65
s111	s112	1	24.01
F3H
SNP 1	SNP 2	D'	Chi-square
s113	s114	1	19.46
s113	s115	1	118.87
s113	s116	0.982149	116.88
s113	s117	0.659246	6.86
s114	s115	1	24.37
s114	s116	1	22.91
s114	s117	1	9.52
s115	s116	1	141.72
s115	s117	0.633916	7.82
s116	s117	0.618197	7.18
CHSC
SNP 1	SNP 2	D'	Chi-square
s118	s119	1	119.41
s118	s120	0.0783505	0.03
s118	s121	0.504188	2.42
s118	s122	0.505804	2.46
s118	s123	1	15.37
s118	s124	1	43.81
s119	s120	1	17.8
s119	s121	1	7.62
s119	s122	1	7.71
s119	s123	1	18.92
s119	s124	0.825324	37.4
s120	s121	1	64.05
s120	s122	1	64.5
s120	s123	0.999999	2.16
s120	s124	0.132197	0.3
s121	s122	1	148
s121	s123	1	0.97
s121	s124	1	2.92
s122	s123	1	0.99
s122	s124	1	2.89
s123	s124	1	19.19
