# Supplementary material for: A Candidate-Gene Association Study for Berry Colour and Anthocyanin Content in Vitis vinifera L
Source: PLoS One. 2012 Sep 28;7(9):e46021. doi: 10.1371/journal.pone.0046021 (PMC3461038; doi:10.1371/journal.pone.0046021)
Supplement: Table S9 — Model and interaction P -values of significant interactions between SNPs in different genes ( P <0.001). (XLS) [file pone.0046021.s009.xls]

## Sheet: Sheet1
Supporting Table S9. Significant gene-gene interactions (Model P < 0.001).
MYB11-CHI
Interaction	MYB11	CHI	Model p-value	Interaction p-value
s89s75	s89	s75	2.4e-05	0.0026
s94s75	s94	s75	0.0002	0.0036
s86s75	s86	s75	0.0002	0.00039
s90s75	s90	s75	0.00026	0.039
s80s75	s80	s75	0.00075	0.016
MYB11-CHSA
Interaction	MYB11	CHSA	Model p-value	Interaction p-value
s90s49	s90	s49	0.0001	0.0096
MYB11-F3H
Interaction	MYB11	F3H	Model p-value	Interaction p-value
s90s114	s90	s114	0.00082	0.019
MYB11-LDOX
Interaction	MYB11	LDOX	Model p-value	Interaction p-value
s90s42	s90	s42	7.4e-05	0.51
s93s42	s93	s42	0.00043	0.0012
s80s44	s80	s44	0.00048	0.0017
s92s42	s92	s42	0.00053	0.0026
s78s43	s78	s43	0.00066	4.5e-05
s87s42	s87	s42	0.00084	0.0077
MYB11-UFGT
Interaction	MYB11	UFGT	Model p-value	Interaction p-value
s90s25	s90	s25	0.00067	0.052
MYB11-MRP
Interaction	MYB11	MRP	Model p-value	Interaction p-value
s87s106	s87	s106	0.00021	0.00065
s93s106	s93	s106	0.0003	0.00027
s90s103	s90	s103	0.00036	0.0085
s91s106	s91	s106	0.00047	0.0015
s90s104	s90	s104	0.00056	0.45
s90s106	s90	s106	0.00065	0.029
s90s98	s90	s98	0.00065	0.027
s91s97	s91	s97	0.00074	0.003
s93s103	s93	s103	0.00066	0.00066
s87s103	s87	s103	0.00095	0.0036
MYB11-MYCB
Interaction	MYB11	MYCB	Model p-value	Interaction p-value
s90s36	s90	s36	1.2e-06	0.016
s91s36	s91	s36	1.5e-06	0.11
s87s36	s87	s36	1.7e-06	0.011
s89s36	s89	s36	5.6e-06	0.98
s80s36	s80	s36	1.2e-05	0.87
s93s36	s93	s36	1.4e-05	0.059
s94s36	s94	s36	1.8e-05	0.88
s82s36	s82	s36	2.1e-05	0.33
s79s36	s79	s36	2.2e-05	0.074
s77s36	s77	s36	2.7e-05	0.71
s84s36	s84	s36	3.6e-05	0.51
s92s36	s92	s36	3.8e-05	0.041
s85s36	s85	s36	6.1e-05	0.39
s88s36	s88	s36	6.4e-05	0.59
s81s36	s81	s36	6.8e-05	0.6
s78s36	s78	s36	8.8e-05	0.32
s83s36	s83	s36	9e-05	0.52
s86s36	s86	s36	0.00014	0.63
s89s35	s89	s35	0.00017	0.0036
s89s39	s89	s39	0.00034	0.0045
s94s35	s94	s35	0.00087	0.0046
MYB11-MYBCC
Interaction	MYB11	MYCBCC	Model p-value	Interaction p-value
s90s68	s90	s68	1.3e-05	0.74
s91s65	s91	s65	5e-05	0.001
s89s65	s89	s65	6.2e-05	0.018
s86s68	s86	s68	0.0001	0.23
s94s65	s94	s65	0.00012	0.0058
s91s68	s91	s68	0.00016	0.63
s88s68	s88	s68	0.00018	0.27
s94s68	s94	s68	0.00019	0.37
s89s68	s89	s68	0.00023	0.48
s80s65	s80	s65	0.0003	0.015
s90s69	s90	s69	0.00047	0.83
s90s65	s90	s65	0.00048	0.95
s90s72	s90	s72	0.00054	0.83
s87s68	s87	s68	0.00057	0.92
s78s68	s78	s68	0.00059	0.49
s90s66	s90	s66	0.00071	0.1
s92s68	s92	s68	0.00073	0.54
s77s68	s77	s68	0.00082	0.38
s80s68	s80	s68	0.00083	0.83
s93s68	s93	s68	0.00083	0.87
s85s68	s85	s68	0.00099	0.4
MYB11-MYB9
Interaction	pVal	pVal	Model p-value	Interaction p-value
s90s109	s90	s109	0.00083	0.22
MYB11-MYCA
Interaction	pVal	pVal	Model p-value	Interaction p-value
s90s53	s90	s53	0.00053	0.042
s90s57	s90	s57	0.00058	0.029
MYCB-CHSA
Interaction	MYCB	CHSA	Model p-value	Interaction p-value
s36s48	s36	s48	9e-05	0.42
s36s49	s36	s49	2.4e-05	0.27
s36s50	s36	s50	6.3e-05	0.93
s36s51	s36	s51	6.2e-05	0.095
s36s52	s36	s52	2.3e-05	0.069
MYCB-CHSc
Interaction	MYCB	CHSC	Model p-value	Interaction p-value
s36s118	s36	s118	6.9e-05	0.48
s36s119	s36	s119	9.5e-05	0.64
s36s120	s36	s120	8.8e-05	0.98
s36s121	s36	s121	8.1e-05	0.53
s36s122	s36	s122	7.6e-05	0.52
s36s123	s36	s123	1.8e-05	0.48
s36s124	s36	s124	5.5e-05	0.11
MYCB-CHI
Interaction	MYCB	CHI	Model p-value	Interaction p-value
s36s74	s36	s74	8.1e-05	0.7
s36s75	s36	s75	1.8e-05	0.87
s36s76	s36	s76	1.4e-05	0.65
MYCB-F3H
Interaction	MYCB	F3H	Model p-value	Interaction p-value
s36s113	s36	s113	1.5e-05	0.071
s36s114	s36	s114	9.1e-05	0.41
s36s115	s36	s115	1.4e-05	0.077
s36s116	s36	s116	1.6e-05	0.092
s36s117	s36	s117	1.6e-05	0.092
MYCB-F3'HB
Interaction	MYCB	F3'HB	Model p-value	Interaction p-value
s36s45	s36	s45	1.2e-05	0.024
s36s47	s36	s47	3.8e-05	0.099
s36s46	s36	s46	0.00034	0.68
MYCB-DFR
Interaction	MYCB	DFR	Model p-value	Interaction p-value
s36s10	s36	s10	1.4e-06	0.013
s36s6	s36	s6	6e-06	0.9
s36s3	s36	s3	8.5e-06	0.028
s36s7	s36	s7	1.4e-05	0.62
s36s2	s36	s2	1.6e-05	0.68
s36s4	s36	s4	3.7e-05	0.05
s36s5	s36	s5	6.5e-05	0.74
s36s1	s36	s1	7.7e-05	0.77
s36s9	s36	s9	8.7e-05	0.8
s36s8	s36	s8	9.7e-05	0.54
s36s12	s36	s12	0.00011	0.66
s36s11	s36	s11	0.00014	0.93
MYCB-LDOX
Interaction	MYCB	LDOX	Model p-value	Interaction p-value
s36s42	s36	s42	4.5e-06	0.016
s36s43	s36	s43	6.1e-06	0.65
s35s42	s35	s42	2.3e-05	8.3e-05
s39s42	s39	s42	6.1e-05	9.5e-05
s36s44	s36	s44	6.5e-05	0.31
s39s44	s39	s44	0.00022	0.0005
s35s44	s35	s44	0.00078	0.0028
MYCB-UFGT
Interaction	MYCB	UFGT	Model p-value	Interaction p-value
s36s16	s36	s16	6.9e-08	0.00031
s36s22	s36	s22	9.9e-08	0.00013
s36s28	s36	s28	2.3e-07	0.00085
s36s20	s36	s20	2.9e-07	0.00031
s36s18	s36	s18	4.6e-06	0.013
s36s21	s36	s21	9.4e-06	0.016
s36s23	s36	s23	1.5e-05	0.067
s36s24	s36	s24	1.7e-05	0.079
s36s25	s36	s25	2.6e-05	0.11
s36s30	s36	s30	3.2e-05	0.094
s36s26	s36	s26	3.4e-05	0.046
s36s31	s36	s31	4.9e-05	0.7
s36s14	s36	s14	5e-05	0.63
s36s27	s36	s27	5.6e-05	0.34
s36s17	s36	s17	7.4e-05	0.4
s36s29	s36	s29	7.5e-05	0.05
s36s13	s36	s13	0.00012	0.89
s36s15	s36	s15	0.00012	0.89
s36s19	s36	s19	0.00013	0.55
MYCB-MRP
Interaction	MYCB	MRP	Model p-value	Interaction p-value
s36s97	s36	s97	6.3e-06	0.027
s36s106	s36	s106	1.2e-05	0.028
s36s95	s36	s95	2.6e-05	0.28
s36s102	s36	s102	2.9e-05	0.09
s36s96	s36	s96	3.1e-05	0.085
s36s100	s36	s100	3.6e-05	0.12
s36s101	s36	s101	4.4e-05	0.12
s36s104	s36	s104	5.9e-05	0.86
s36s103	s36	s103	7.4e-05	0.33
s36s108	s36	s108	0.00011	0.3
s36s107	s36	s107	0.00017	0.23
s36s98	s36	s98	0.00056	0.47
MYCB-GST
Interaction	MYCB	GST	Model p-value	Interaction p-value
s36s59	s36	s59	9.8e-05	0.79
s36s60	s36	s60	4e-05	0.058
s36s61	s36	s61	1.3e-05	0.063
MYCB-MYBCC
Interaction	MYCB	MYBCC	Model p-value	Interaction p-value
s36s63	s36	s63	4.9e-07	0.0043
s36s69	s36	s69	4.9e-07	0.0043
s36s72	s36	s72	6.4e-07	0.0049
s36s65	s36	s65	1.5e-06	0.096
s36s62	s36	s62	1.5e-06	0.005
s36s64	s36	s64	5.4e-06	0.094
s36s66	s36	s66	9.7e-06	0.45
s36s68	s36	s68	1.1e-05	0.68
s36s71	s36	s71	1.5e-05	0.014
s36s73	s36	s73	3.3e-05	0.44
s36s67	s36	s67	3.8e-05	0.35
s36s70	s36	s70	4.2e-05	0.31
s39s68	s39	s68	4.6e-05	0.008
s35s68	s35	s68	0.00011	0.042
s32s68	s32	s68	0.00026	0.57
s37s68	s37	s68	0.00048	0.13
s40s68	s40	s68	0.0005	0.13
s33s68	s33	s68	0.00051	0.13
s34s68	s34	s68	0.00094	0.3
MYCB-MYB9
Interaction	pVal	pVal	Model p-value	Interaction p-value
s36s109	s36	s109	1.4e-06	0.015
s36s111	s36	s111	7.3e-05	0.33
s36s112	s36	s112	8.1e-05	0.45
s36s110	s36	s110	0.00012	0.71
MYCB-MYCA
Interaction	pVal	pVal	Model p-value	Interaction p-value
s36s57	s36	s57	9.1e-06	0.14
s36s53	s36	s53	3.8e-05	0.71
s36s58	s36	s58	7.4e-05	0.35
s36s56	s36	s56	0.0001	0.92
s36s55	s36	s55	0.00016	0.33
MYBCC-CHSA
Interaction	MYBCC	CHSA	Model p-value	Interaction p-value
s68s51	s68	s51	0.0002	0.56
MYBCC-CHSC
Interaction	MYBCC	CHSC	Model p-value	Interaction p-value
s68s123	s68	s123	0.00026	0.2
s68s118	s68	s118	0.00066	0.16
s68s119	s68	s119	0.00084	0.19
MYBCC-CHI
Interaction	MYBCC	CHI	Model p-value	Interaction p-value
s68s76	s68	s76	0.00011	0.72
s68s75	s68	s75	0.00015	0.82
s65s75	s65	s75	0.0008	0.028
MYBCC-F3H
Interaction	MYBCC	F3H	Model p-value	Interaction p-value
s68s115	s68	s115	0.00041	0.66
MYBCC-F3'HB
Interaction	MYBCC	F3'HB	Model p-value	Interaction p-value
s68s47	s68	s47	8.1e-05	0.53
s68s46	s68	s46	0.00091	0.19
MYBCC-DFR
Interaction	MYBCC	DFR	Model p-value	Interaction p-value
s68s10	s68	s10	6.8e-06	0.016
s68s4	s68	s4	2.8e-05	0.0078
s68s3	s68	s3	3.9e-05	0.02
s68s5	s68	s5	9.9e-05	0.17
s68s6	s68	s6	0.0004	0.24
s68s2	s68	s2	0.00045	0.35
s68s12	s68	s12	0.00053	0.18
s68s7	s68	s7	0.00065	0.51
s68s9	s68	s9	0.00071	0.22
s68s1	s68	s1	0.00079	0.31
MYBCC-LDOX
Interaction	MYBCC	LDOX	Model p-value	Interaction p-value
s68s44	s68	s44	8.0554e-05	0.0233
s68s43	s68	s43	0.00031173	0.045
MYBCC-UFGT
Interaction	MYBCC	UFGT	Model p-value	Interaction p-value
s68s17	s68	s17	9.7711e-05	0.347
s68s27	s68	s27	0.00011254	0.9972
s68s30	s68	s30	0.00024561	0.8383
s68s18	s68	s18	0.00036057	0.1313
s68s16	s68	s16	0.00036701	0.0542
s68s14	s68	s14	0.00075802	0.3445
s68s31	s68	s31	0.00080998	0.3573
s68s23	s68	s23	0.00084083	0.4009
MYBCC-MRP
Interaction	MYBCC	MRP	Model p-value	Interaction p-value
s68s106	s68	s106	5.3e-06	0.017
s68s103	s68	s103	9e-06	0.017
s68s96	s68	s96	1.3e-05	0.0025
s68s97	s68	s97	1.5e-05	0.028
s68s95	s68	s95	1.6e-05	0.0095
s68s105	s68	s105	0.00015	0.036
s68s102	s68	s102	0.00016	0.048
s68s108	s68	s108	0.00016	0.051
s68s100	s68	s100	0.0002	0.052
s68s101	s68	s101	0.00021	0.052
s68s98	s68	s98	0.00024	0.015
s70s95	s70	s95	0.0003	6.4e-05
s68s99	s68	s99	0.00056	0.73
MYBCC-GST
Interaction	MYBCC	GST	Model p-value	Interaction p-value
s68s61	s68	s61	0.0001	0.18
s68s59	s68	s59	0.00055	0.055
MYBCC-MYB9
Interaction	pVal	pVal	Model p-value	Interaction p-value
s68s109	s68	s109	0.00012	0.36
s68s112	s68	s112	0.00019	0.92
s65s109	s65	s109	0.00063	0.02
MYBCC-MYCA
Interaction	pVal	pVal	Model p-value	Interaction p-value
s68s57	s68	s57	0.00021	0.06
s68s53	s68	s53	0.0003	0.69
s68s58	s68	s58	0.00081	0.27
