# Supplementary material for: A Candidate-Gene Association Study for Berry Colour and Anthocyanin Content in Vitis vinifera L
Source: PLoS One. 2012 Sep 28;7(9):e46021. doi: 10.1371/journal.pone.0046021 (PMC3461038; doi:10.1371/journal.pone.0046021)
Supplement: Table S10 — Percentage of SNPs involved in significant interactions. (XLS) [file pone.0046021.s010.xls]

## Sheet: Sheet1
Supporting Table S10. Number and percentage of SNPs within each gene involved in significant SNP-SNP interactions (P < 0.001).
MYB11							MYCB							MYBCC
Second gene tested to interact with MYB11	Number of significant interactions (P < 0.001)	SNPs within MYB11 involved in significant interactions		SNPs within the second gene involved in significant interactions			Second gene tested to interact with MYCB	Number of significant interactions (P < 0.001)	SNPs within MYCB involved in significant interactions		SNPs within the second gene involved in significant interactions			Second gene tested to interact with MYBCC	Number of significant interactions (P < 0.001)	SNPs within MYBCC involved in significant interactions		SNPs within the second gene involved in significant interactions
		Number	Percentage	Number	Percentage				Number	Percentage	Number	Percentage				Number	Percentage	Number	Percentage
CHSA	1	1	5.55556	1	20		CHSA	5	1	10	5	100		CHSA	1	1	8.33333	1	20
CHSC	0	0	0	0	0		CHSC	7	1	10	7	100		CHSC	3	1	8.33333	3	42.8571
CHI	5	5	27.7778	1	33.3333		CHI	3	1	10	3	100		CHI	3	2	16.6667	2	66.6667
F3H	1	1	5.55556	1	20		F3H	5	1	10	5	100		F3H	1	1	8.33333	1	20
F3’HB	0	0	0	0	0		F3’HB	3	1	10	3	100		F3’HB	2	1	8.33333	2	66.6667
DFR	0	0	0	0	0		DFR	12	1	10	12	100		DFR	10	1	8.33333	10	83.3333
LDOX	6	6	33.3333	3	100		LDOX	7	4	40	3	100		LDOX	2	1	8.33333	2	66.6667
UFGT	1	1	5.55556	1	5.26316		UFGT	19	1	10	19	100		UFGT	8	1	8.33333	8	42.1053
MRP	10	4	22.2222	6	42.8571		MRP	12	1	10	12	85.7143		MRP	13	2	16.6667	12	85.7143
GST	0	0	0	0	0		GST	3	1	10	3	50		GST	2	1	8.33333	2	33.3333
MYCA	2	1	5.55556	2	16.6667		MYCA	5	1	10	5	41.6667		MYCA	3	1	8.33333	3	25
MYB9	1	1	5.55556	1	10		MYB9	4	1	10	4	40		MYB9	3	2	16.6667	2	20
MYBCC	21	13	72.2222	5	41.6667		MYBCC	19	8	80	12	100		MYBCC	_	_	_	_	_
MYCB	21	18	100	3	30		MYCB	_	_	_	_	_		MYCB	_	_	_	_	_
MYB11	_	_	_	_	_		MYB11	_	_	_	_	_		MYB11	_	_	_	_	_
